# Supplementary material for: One-shot K-region-selective annulative π-extension for nanographene synthesis and functionalization
Source: PubMed Central journal article supplement (PMC4339889; doi:10.1038/ncomms7251), 2015-02-16
Supplement: ncomms7251-s1.pdf [file ncomms7251-s1.pdf]

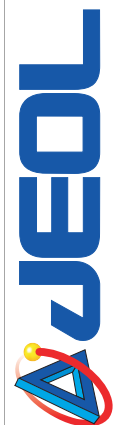

```

/Users/kyoheiozaki/Desktop
= itami
= single_pulse.ex2
= S#837585
= CHLOROFORM-D
= 7-JAN-2013 23:01:58
= 30-SEP-2014 23:27:58
= 30-SEP-2014 23:27:58
= single_pulse
= 1D COMPLEX
= 26214
= 1H
= [ppm]
= X
= ECA600
= JNM-ECA600
Spectrometer
Field Strength = 14.08462569 [T] (600 [MHz])
X_Acq_Duration = 2.9097984 [s]
X_Domain
X_Freq = 599.67230511 [MHz]
X_Offset = 5 [ppm]
X_Points = 32768
X_Prescans = 1
X_Resolution = 0.34366642 [Hz]
X_Sweep = 11.26126126 [kHz]
Irr_Domain = 1H
Irr_Freq = 599.67230511 [MHz]
Irr_Offset = 5 [ppm]
Tri_Domain = 1H
Tri_Freq = 599.67230511 [MHz]
Tri_Offset = 5 [ppm]
Clipped = FALSE
Acc_Return = 8
Sca1 = 8
Total_Scans = 8
X_90_Width = 14.2 [us]
X_Acq_Time = 2.9097984 [s]
X_Angle = 45 [deg]
X_Atn = 3.3 [dB]
X_Pulse = 7.1 [us]
Irr_Mode = Off
Tri_Mode = Off
Dante_Preset = FALSE
Initial_Wait = 1 [s]
Recvr_Gain = 18
Relaxation_Delay = 5 [s]
Repetition_Time = 7.9097984 [s]
Temp_Get = 22.6 [dC]

```

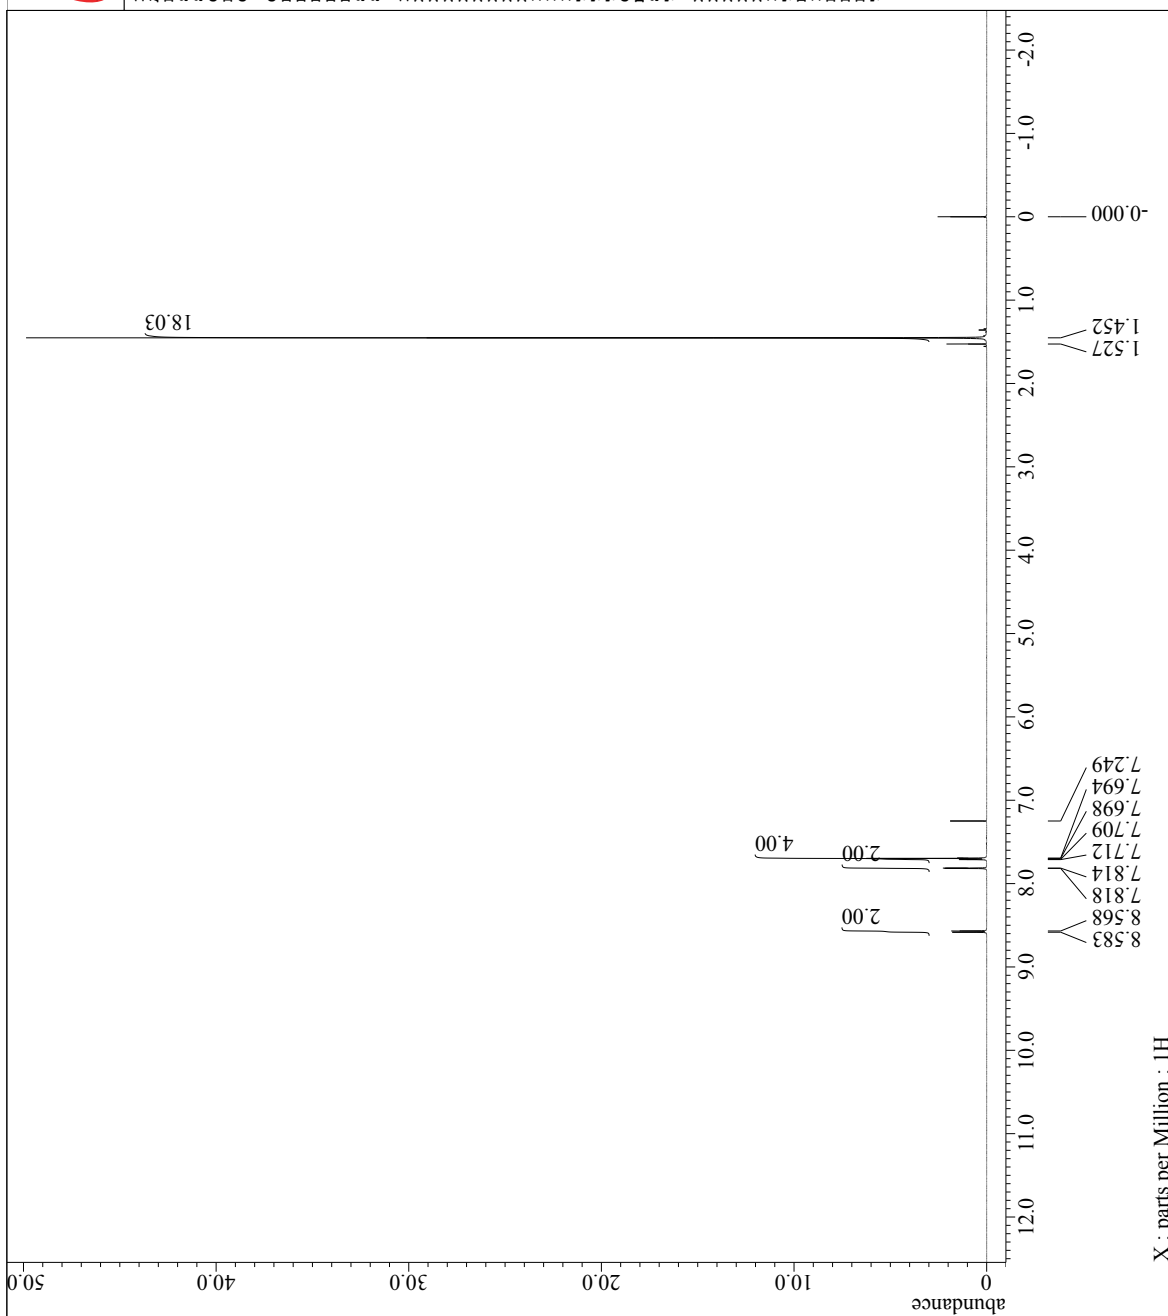

Supplementary Figure 1. <sup>1</sup>H NMR (600 MHz, CDCl<sub>3</sub>) of 1a

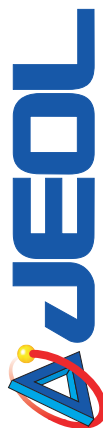

```

/Users/kyoheiozaki/Desktop
= itami
= single_pulse_dec
= S839803
= CHLORFORM-D
= 30-SEP-2014 23:17:43
= 30-SEP-2014 23:28:58
= 30-SEP-2014 23:29:21
= single_pulse_decoupled_gat
= 1D COMPLEX
= 26214
= 13C
= [ppm]
= X
= ECA600
= JNM-ECA600
Field Strength = 14.08462569[T] (600[MHz])
X_Acq_Duration = 0.69206016[s]
X_Domain = 13C
X_Freq = 78770543[MHz]
X_Offset = 100[ppm]
X_Points = 32768
X_Prescans = 4
X_Resolution = 1.44496109[Hz]
X_Sweep = 47.34848485[kHz]
Irr_Domain = 1H
Irr_Freq = 599.67230511[MHz]
Irr_Offset = 5[ppm]
Clipped = FALSE
Mod_Return = 1
Scans = 256
Total_Scans = 256
X_90_Width = 11.2[us]
X_Acq_Time = 90.9206016[s]
X_Angle = 0[deg]
X_Pulse = 7.8[dB]
X_Pulse_Prog = 3.73333333[us]
Irr_Atn_Dec = 17.871[dB]
Irr_Atn_Noise = 17.871[dB]
WALTZ = WALTZ
Decoupling = TRUE
Initial_Wait = 1[s]
Noe = TRUE
Noe_Time = 2[s]
Recvr_Gain = 60
Relaxation_Delay = 2[s]
Repetition_Time = 2.69206016[s]
Temp_Get = 23.8[degC]

```

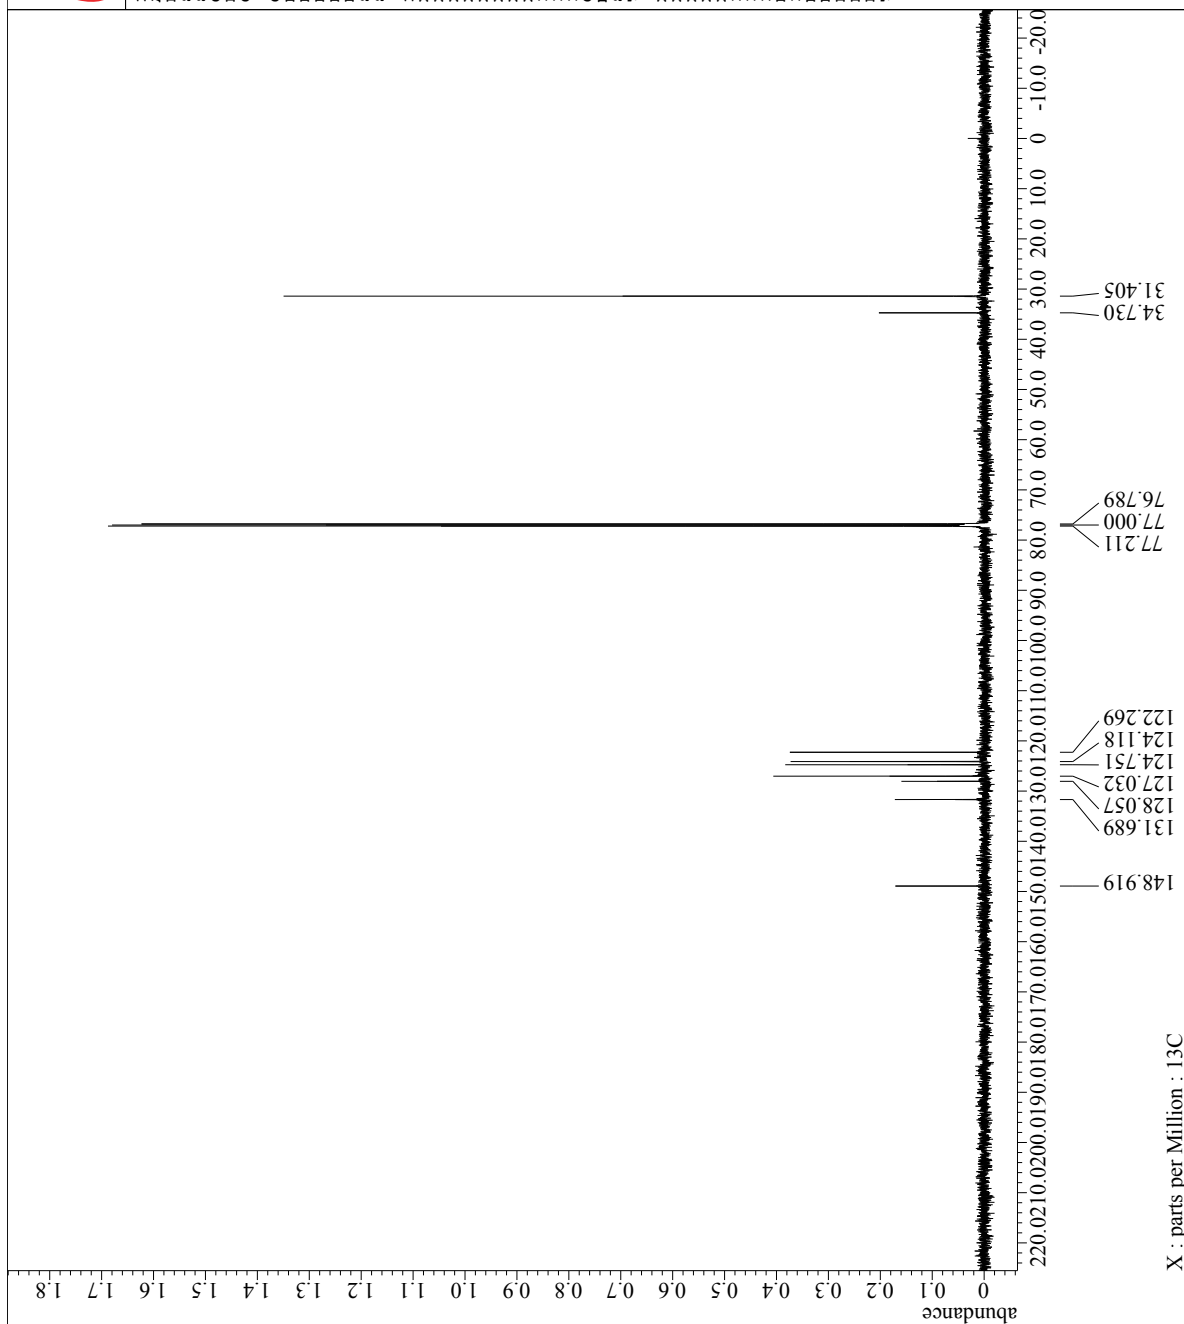

Supplementary Figure 2. <sup>13</sup>C NMR (150 MHz, CDCl<sub>3</sub>) of 1a

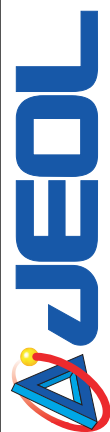

```

/Users/kyoheioraki/Desktop
= itami
= single_pulse.ex2
= S#32761
= CHLOROFORM-D
= 12-SEP-2014 00:57:41
= 30-SEP-2014 23:33:27
= 30-SEP-2014 23:33:41
= single_pulse
= ID COMPLEX
= 26214
= 1H
= [ppm]
= KCA600
= JNM-ECA600
Spectrometer
Field Strength = 14.08462569[T] (600[MHz])
X Acq_Duration = 2.9097984[s]
X Domain = 1H
X Freq = 599.67230511[MHz]
X Points = 32768
X Prescans = 1
X Resolution = 0.34366642[Hz]
X Sweep = 11.26126126[kHz]
Irr Domain = 1H
Irr Freq = 599.67230511[MHz]
Irr Offset = 5[ppm]
Irr_Domain = 1H
Irr_Freq = 599.67230511[MHz]
Irr_Offset = 5[ppm]
C11_Offset = FALSE
Magsreturn = 1
Scans = 8
Total_Scans = 8
X 90_Width = 13.8[us]
X Acq_Time = 2.9097984[s]
X Angle = 45[deg]
X Atn = 3.3[dB]
X Pulse = 6.9[us]
Irr_Mode = Off
Tri_Mode = Off
Dante_Preset = FALSE
Initial_Wait = 1[s]
Recvr_Gain = 50
Relaxation_Delay = 7[s]
Repetition_Time = 7.9097984[s]
Temp_Get = 24.5[degC]
  
```

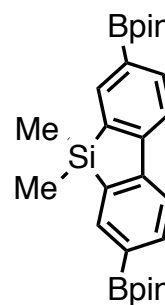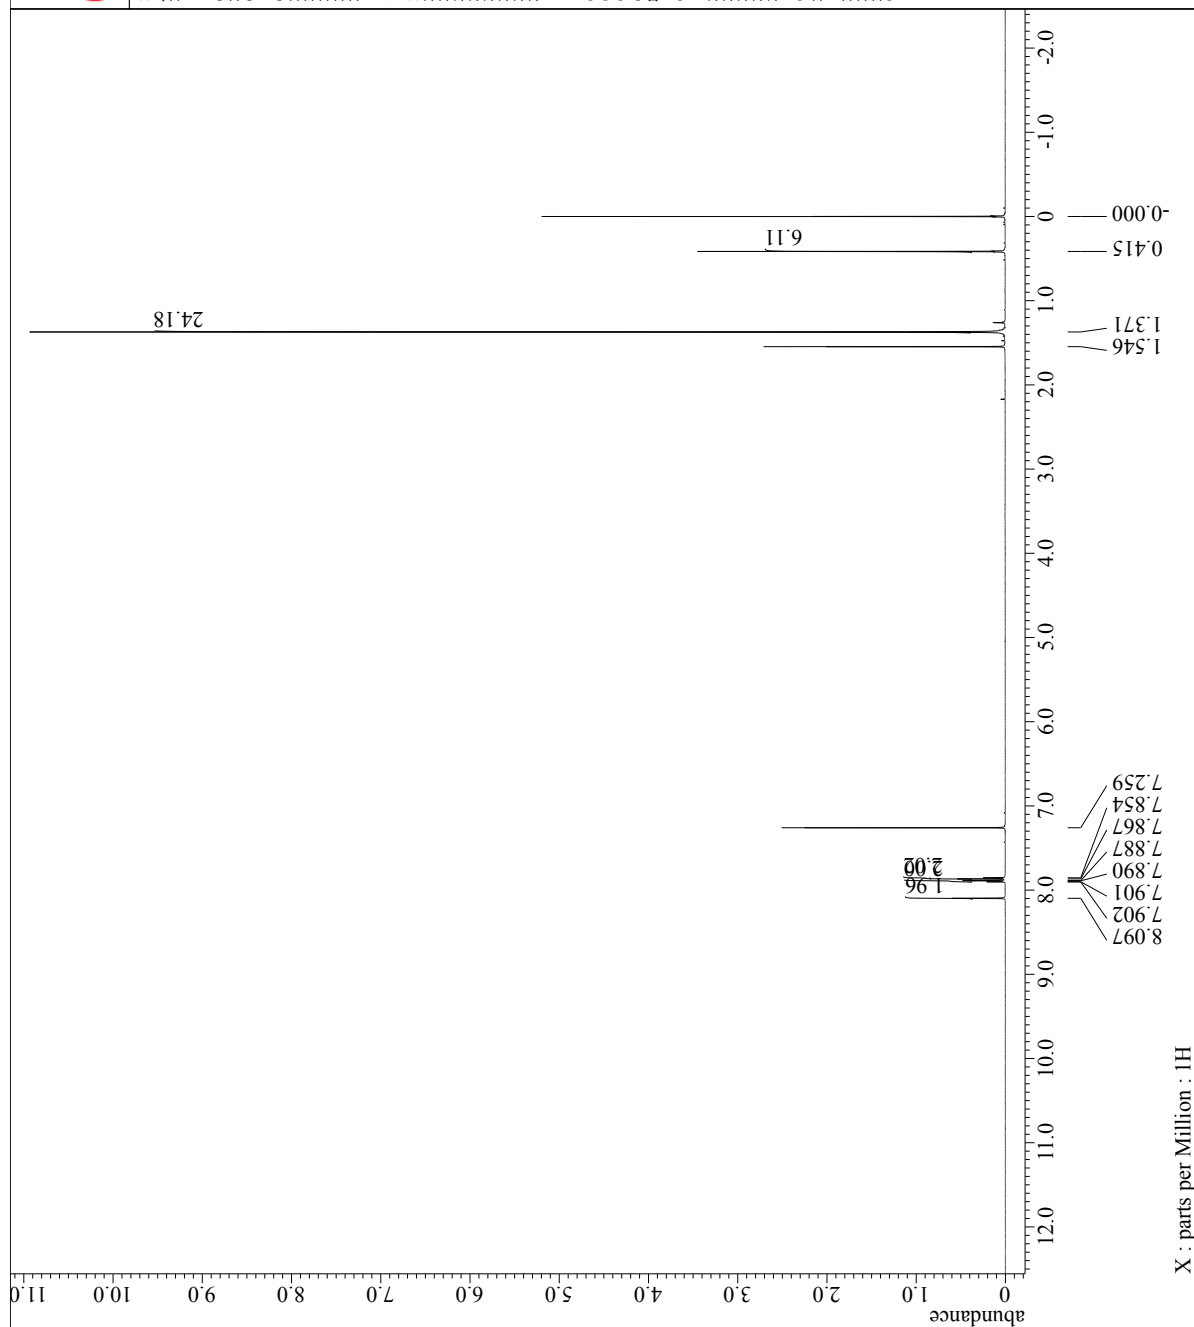

Supplementary Figure 3. <sup>1</sup>H NMR (600 MHz, CDCl<sub>3</sub>) of 2f

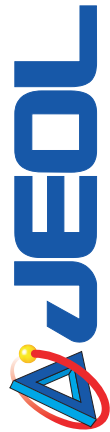

Filename = /users/kycheiozaki/Desktop  
Author = itami  
Experiment = single\_pulse\_dec  
Sample Id = 1  
Solvent = CHLOROFORM-D  
Creation Time = 12-SEP-2014 09:20:32  
Revision Time = 12-SEP-2014 09:21:03  
Current Time = 30-SEP-2014 23:34:27  
Comment = single pulse decoupled gat  
Data Format = 1D COMPLEX  
Dim Size = 26214  
Dim Title = 13C  
Dim Units = [ppm]  
Dimensions = X  
Site = ECA600  
Spectrometer = JNM-ECA600  
Field Strength = 14.08462569[T] (600 [MHz])  
X\_Acq Duration = 0.69206016[s]  
X\_Domain = 13C  
X\_Freq = 150.78770543 [MHz]  
X\_Offset = 100 [ppm]  
X\_Points = 32768  
X\_Prescans = 4  
X\_Resolution = 1.44496109 [Hz]  
X\_Sweep = 47.34848485 [kHz]  
Irr\_Domain = 1H  
Irr\_Freq = 599.67230511 [MHz]  
Irr\_Offset = 5 [ppm]  
Clipped = FALSE  
Mod Return = 1  
Scans = 10099  
Total\_Scans = 10099  
X\_90\_Width = 11.6 [us]  
X\_Acq Time = 0.69206016 [s]  
X\_Angle = 30 [deg]  
X\_Pulse = 7.8 [dB]  
X\_Pulse = 3.86666667 [us]  
Irr\_Atn Dec = 18.119 [dB]  
Irr\_Atn Noe = 18.119 [dB]  
Decoupling = WALTZ  
Initial\_Wait = TRUE  
Noe = 1 [s]  
Noe\_Time = TRUE  
Recvr Gain = 2 [s]  
Relaxation\_Delay = 60  
Repetition\_Time = 2 [s]  
Temp\_Get = 2.69206016 [s]  
Temp\_Set = 24.9 [dC]

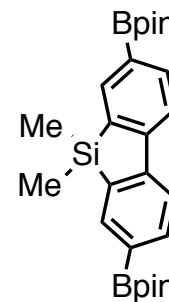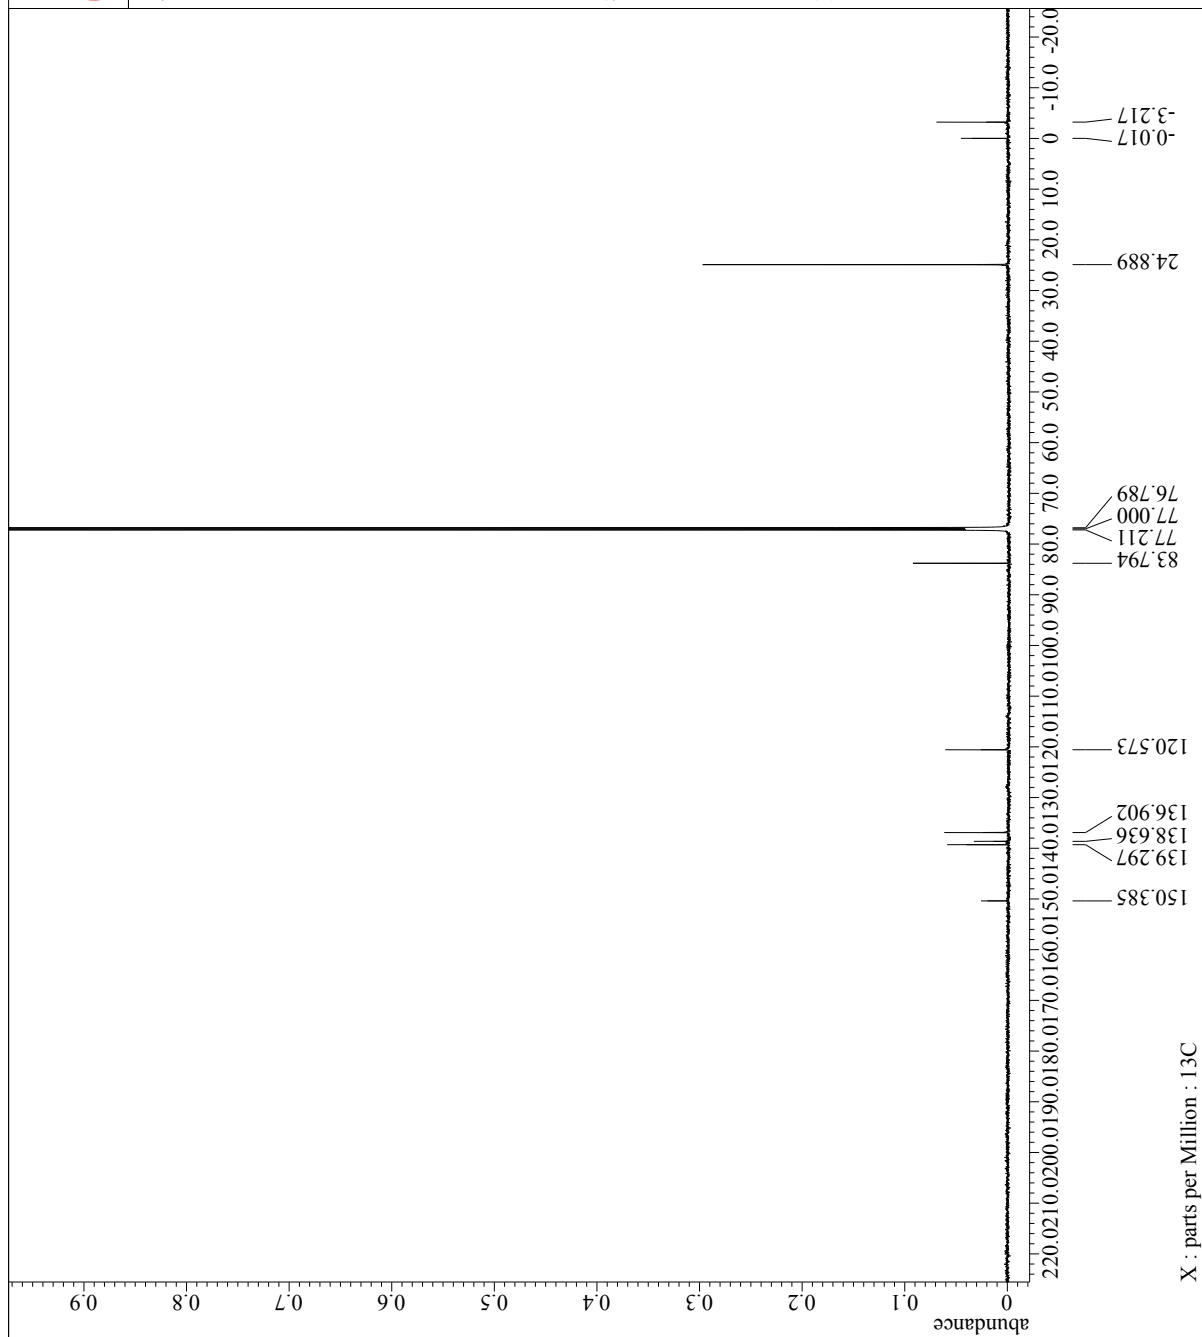

Supplementary Figure 4.  $^{13}\text{C}$  NMR (150 MHz,  $\text{CDCl}_3$ ) of **2f**

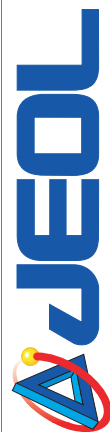

```

/Users/kyoheiozaki/Desktop
= test
= single_pulse.ex2
= S#765771
= CHLOROFORM-D
= 17-DEC-2012 21:04:17
= 30-SEP-2014 23:36:19
= 30-SEP-2014 23:36:25

Comment = single_pulse
Data_Format = 1D COMPLEX
Dim_Size = 26214
Dim_Title = 1H
Dim_Units = [ppm]
Dimensions = X
Site = ECA600
Spectrometer = JNM-ECA600

Field_Strength = 14.08462569[T] (600 [MHz])
X_Acq_Duration = 2.9097984[s]
X_Domain = 1H
X_Freq = 599.67230511[MHz]
X_Offset = 5[ppm]
X_Points = 32768
X_Prescans = 1
X_Resolution = 0.34366642[Hz]
X_Sweep = 11.26126126[kHz]
Irr_Domain = 1H
Irr_Freq = 599.67230511[MHz]
Irr_Offset = 5[ppm]
Tri_Domain = 1H
Tri_Freq = 599.67230511[MHz]
Tri_Offset = 5[ppm]
Clipped = FALSE
Mod_Return = 1
Scans = 8
Total_Scans = 8
X_90_Width = 14.2[us]
X_Acq_Time = 2.9097984[s]
X_Angle = 45[deg]
X_Atn = 3.3[dB]
X_Pulse = 7.1[us]
Irr_Mode = Off
Tri_Mode = Off
Dante_Presat = FALSE
Initial_Wait = 1[s]
Recvr_Gain = 38
Relaxation_Delay = 5[s]
Repetition_Time = 7.9097984[s]
Temp_Get = 22.4[degC]

```

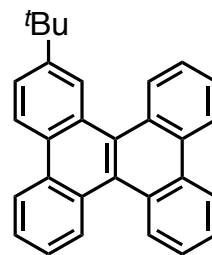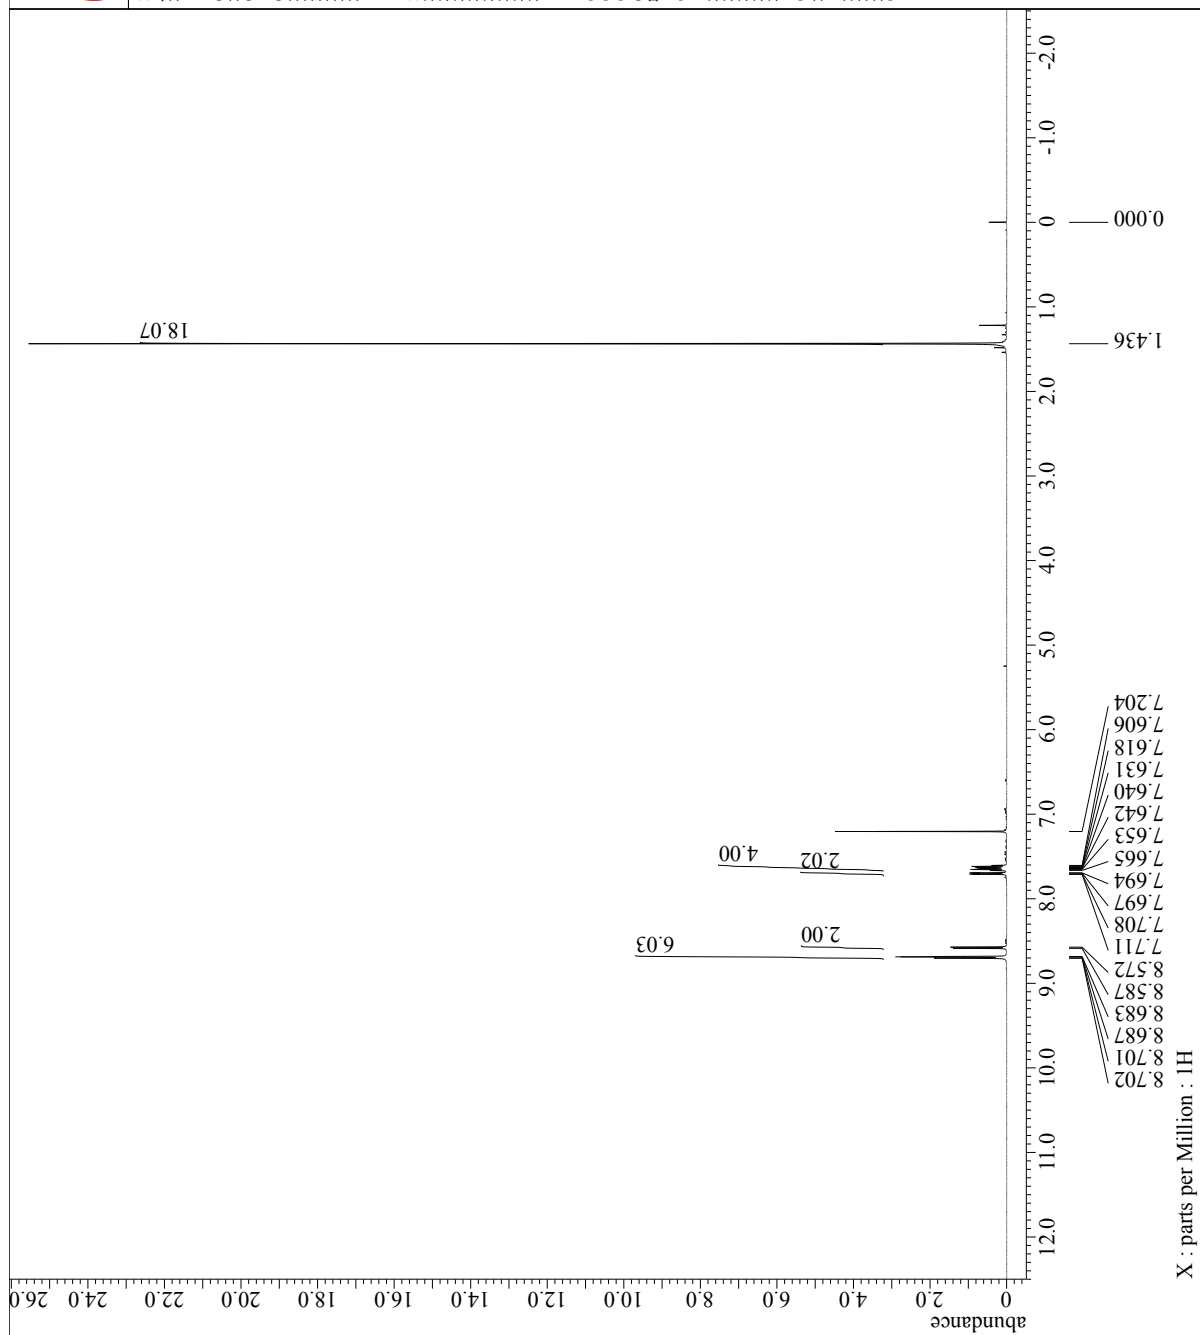

Supplementary Figure 5. <sup>1</sup>H NMR (600 MHz, CDCl<sub>3</sub>) of 3aa

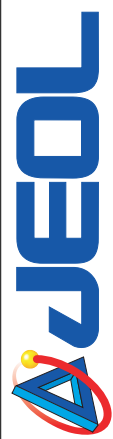

```

= /Users/kycheioraki/Desktop
= item
= single_pulse_dec
= S#767284
= CHLOROFORM-D
= 17-DEC-2012 21:23:52
= 28-MAY-2014 20:33:36
= 20-NOV-2014 01:03:34

= single pulse decoupled gat
= 1D COMPLEX
= 26214
= 13C
= [ppm]
= X
= ECA600
= JNM-ECA600

Field Strength = 14.08462569[T] (600 [MHz])
X_Acquisition = 0.69206016[s]
X_Domain = 13C
X_Freq = 150.78770543 [MHz]
X_Offset = 100 [ppm]
X_Points = 32768
X_Prescans = 4
X_Resolution = 1.44496109 [Hz]
X_Sweep = 47.34848485 [kHz]
Irr_Domain = 1H
Irr_Freq = 599.67230511 [MHz]
Irr_Offset = 5 [ppm]
Clipped = FALSE
Mod Return = 1
Scans = 385
Total_Scans = 385

X_90_Width = 11.2 [us]
X_Acq_Time = 0.69206016 [s]
X_Angle = 30 [deg]
X_Attn = 7.8 [dB]
X_Pulse = 3.73333333 [us]
Irr_Atn_Dec = 17.871 [dB]
Irr_Atn_Noise = 17.871 [dB]
WALTZ = TRUE
Decoupling = TRUE
Initial_Wait = 1 [s]
Noe = TRUE
Noe_Time = 2 [s]
Recvr_Gain = 60
Relaxation_Delay = 2 [s]
Repetition_Time = 2.69206016 [s]
Temp_Get = 23.6 [dC]

```

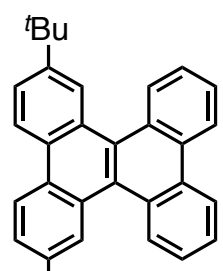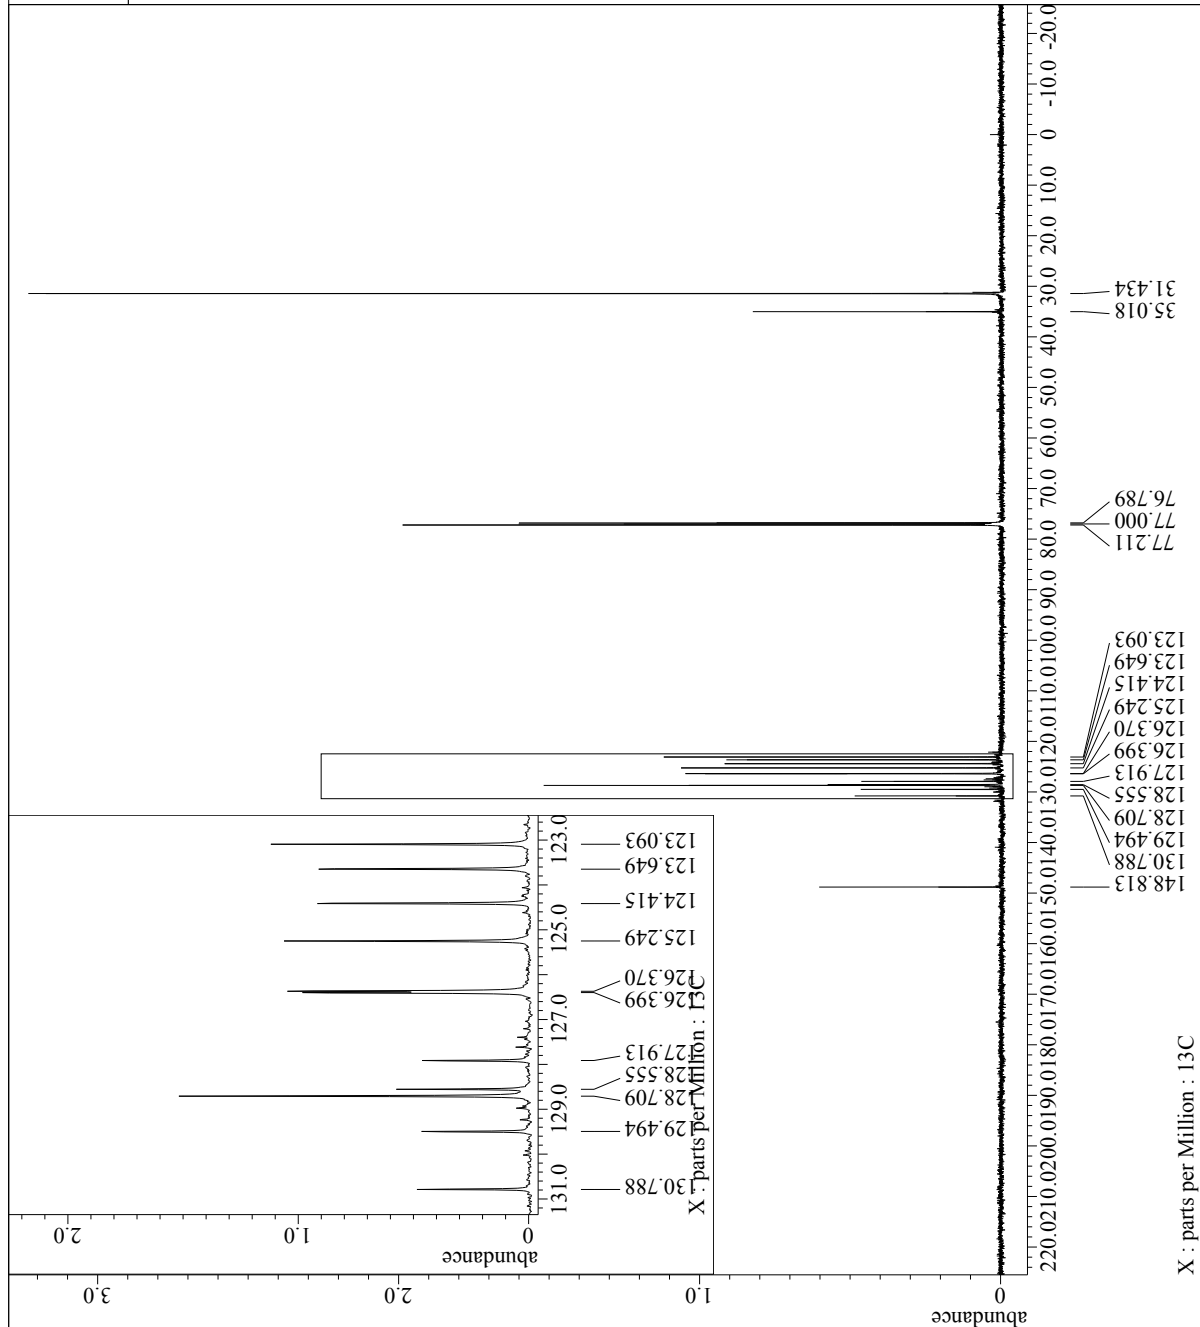

Supplementary Figure 6. <sup>13</sup>C NMR (150 MHz, CDCl<sub>3</sub>) of 3aa

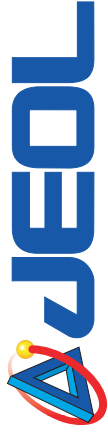

```
Filename = /Users/kyoheiozaki/Desktop
Author = itami
Experiment = single_pulse.ex2
Sample_Id = S#851409
Solvent = CHLOROFORM-D
Creation_Time = 7-JAN-2013 23:25:18
Revision_Time = 30-SEP-2014 23:38:24
Current_Time = 30-SEP-2014 23:38:32

Comment = single_pulse
Data_Format = ID COMPLEX
Dim_Size = 26214
Dim_1 = 1H
Dim_2 = 1H
Dim_3 = 13C
Dimensions = X
Sited = ECA600
Spectrometer = JNM-ECA600

Field_Strength = 14.08462569[T] (600[MHz])
X_Acq_Duration = 2.9097984[s]
X_Domain = 1H
X_Freq = 599.67230511[MHz]
X_Offset = 5[ppm]
X_Points = 32768
X_Prescans = 1
X_Resolution = 0.34366642[Hz]
X_Sweep = 11.26126126[kHz]
Irr_Domain = 1H
Irr_Freq = 599.67230511[MHz]
Irr_Offset = 5[ppm]
Irr_Domain = 1H
Irr_Freq = 599.67230511[MHz]
Irr_Offset = 5[ppm]
T1_Offset = 57[sec]
Clipped = FALSE
Med_Return = 1
Scans = 8
Total_Scans = 8

X_90_Width = 14.2[us]
X_Acq_Time = 2.9097984[s]
X_Angle = 45[deg]
X_Atn = 3.3[dB]
X_Pulse = 7.1[us]
Irr_Mode = Off
Tri_Mode = Off
Dante_Preset = FALSE
Initial_Wait = 1[s]
Recvr_Gain = 40
Relaxation_Delay = 7[s]
Repetition_Time = 7.9097984[s]
Temp_Get = 22.9[degC]
```

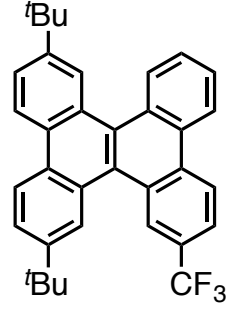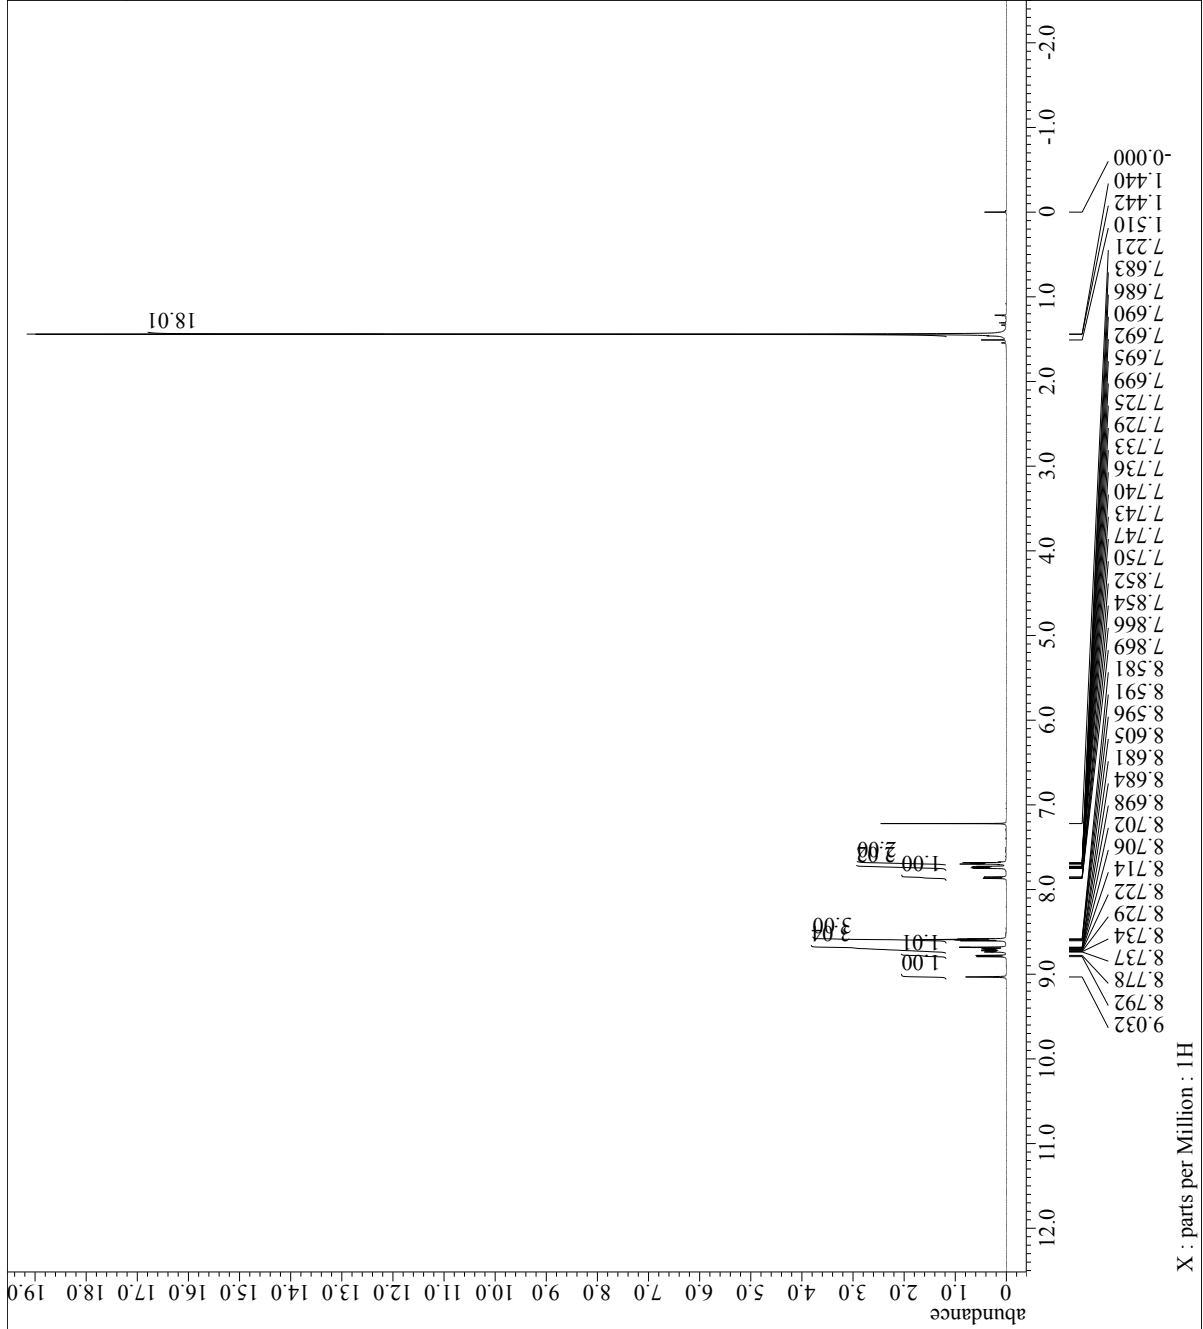

Supplementary Figure 7. <sup>1</sup>H NMR (600 MHz, CDCl<sub>3</sub>) of 3ab

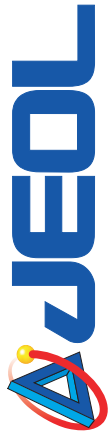

```

/Users/kycheiozaki/Desktop
= itami
= single_pulse_dec
= S#85801
= CHLOROFORM-D
= 18-DEC-2012 07:46:49
= 20-NOV-2014 01:05:06
= 20-NOV-2014 01:05:12
= single pulse decoupled gat
= 1D COMPLEX
= 26214
= 13C
= [ppm]
=
= ECA600
= JNM-ECA600
Spectrometer
=
Field Strength = 14.08462569[T] (600 [MHz])
X_Acq_Duration = 0.69206016[s]
X_Domain = 13C
X_Freq = 150.78770543 [MHz]
X_Offset = 100 [ppm]
X_Points = 32768
X_Prescans = 4
X_Sweep = 1.44496109 [Hz]
X_Resolution = 47.34848485 [kHz]
Irr_Domain = 1H
Irr_Freq = 599.67230511 [MHz]
Irr_Offset = 5 [ppm]
Clipped = FALSE
Mod_Return = 1
Scans = 7479
Total_Scans = 7479
X_90_Width = 11.2 [us]
X_Acq_Time = 0.69206016 [s]
X_Ang = 30 [deg]
X_Atn = 7.8 [dB]
X_Pulse = 3.733333333 [us]
Irr_Atn_Dec = 17.871 [dB]
Irr_Atn_Noise = 17.871 [dB]
WALTZ = TRUE
Decoupling = TRUE
Initial_Wait = 1 [s]
Noe = TRUE
Noe_Time = 2 [s]
Recvr_Gain = 60
Relaxation_Delay = 2 [s]
Repetition_Time = 2.69206016 [s]
Temp_Get = 23.5 [dC]
  
```

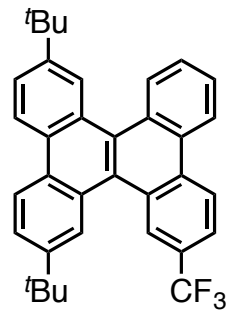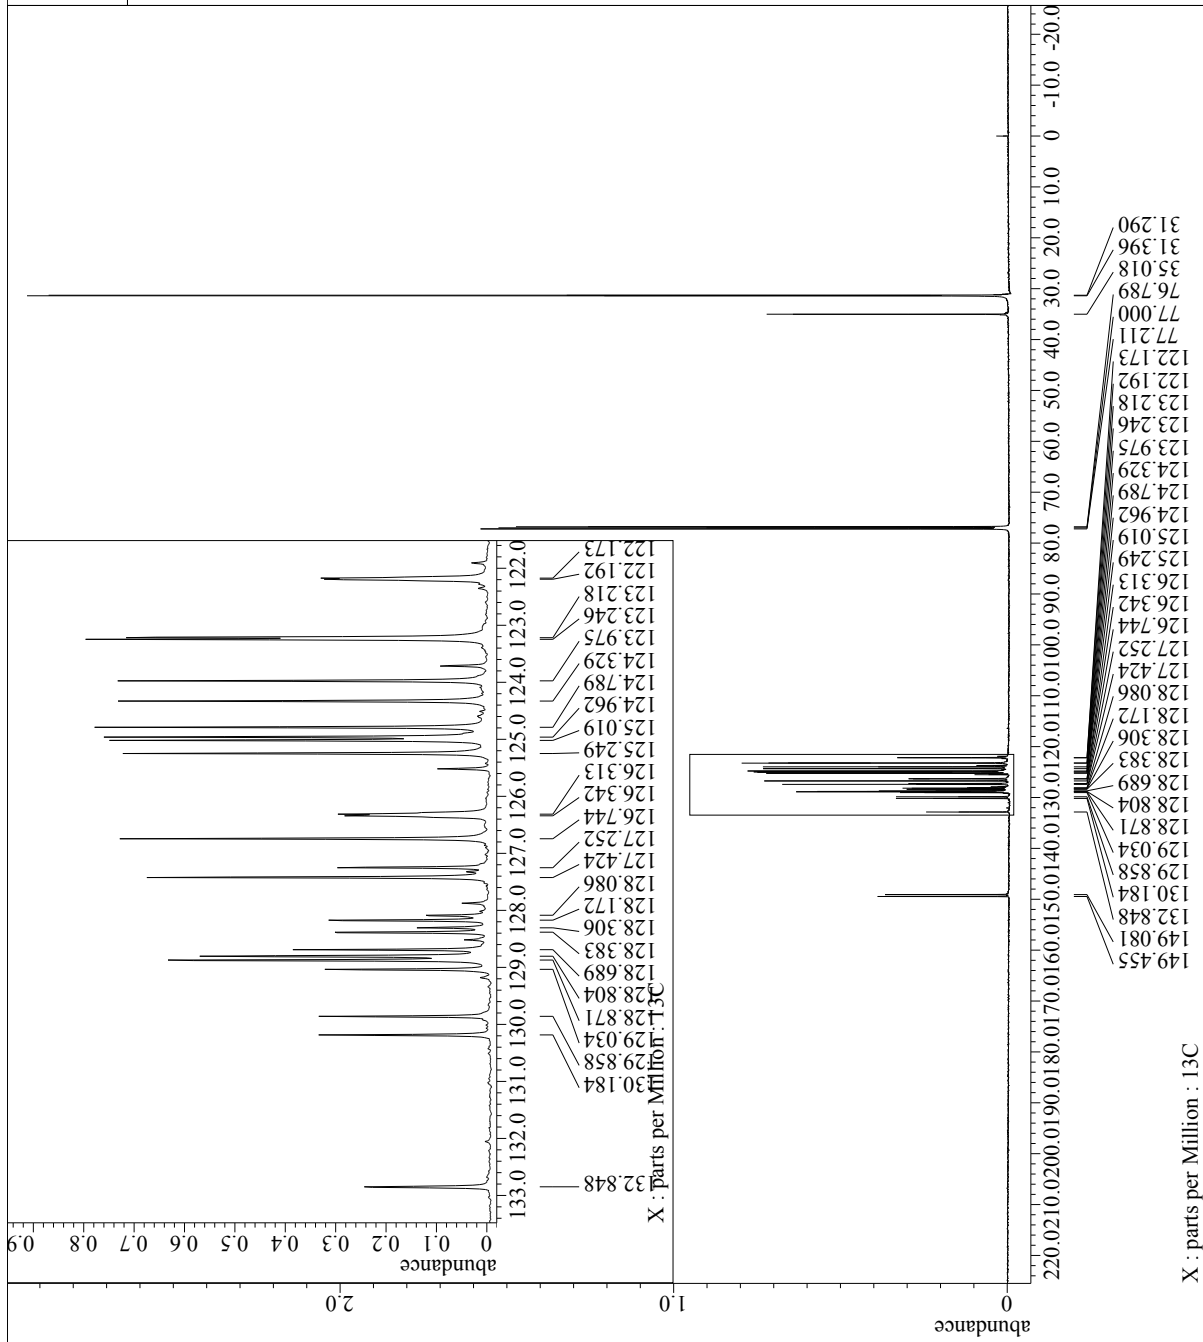

Supplementary Figure 8. <sup>13</sup>C NMR (150 MHz, CDCl<sub>3</sub>) of 3ab



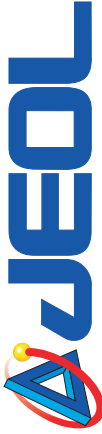

File Name = /Users/kyoheiozaki/desktop  
Author = WPI  
Experiment = single\_pulse.ex2  
Sample\_Id = S#855699  
Solvent = CHLOROFORM-D  
Creation Time = 18-NOV-2014 23:47:21  
Revision\_Time = 20-NOV-2014 11:22:10  
Current\_Time = 20-NOV-2014 11:22:30  
Comment = 19F  
Data format = 1D\_COMPLEX  
Dim Size = 51428  
Dim Units = 19F  
Dimensions = [ppm]  
Spectrometer = JNM-ECA600  
Site = JNM-ECA600  
Field Strength = 14.08462569[T] (600 [MHz])  
X\_Acq\_Duration = 0.229376[s]  
X\_Domain = 19F  
X\_Freq = 564.25564705 [MHz]  
X\_Offset = 0 [ppm]  
X\_Points = 65536  
X\_Prescans = 1  
X\_Resolution = 4.35965402 [Hz]  
X\_Sweep = 285.71428571 [kHz]  
Irr\_Domain = 19F  
Irr\_Freq = 564.25564705 [MHz]  
Irr\_Offset = 5 [ppm]  
Tri\_Domain = 19F  
Tri\_Freq = 564.25564705 [MHz]  
Tri\_Offset = 5 [ppm]  
Clipped = FALSE  
Scan\_Return = 1  
Scans = 8  
Total\_Scans = 8  
X\_90\_Width = 16.4 [us]  
X\_Acq\_Time = 0.229376[s]  
X\_Angle = 45 [deg]  
X\_Atn = 4.4 [dB]  
X\_Pulse = 8.2 [us]  
Irr\_Mode = Off  
Tri\_Mode = Off  
Dante\_Preset = FALSE  
Initial\_Wait = 1[s]  
Recvr\_Gain = 56  
Relaxation\_Delay = 5[s]  
Repetition\_Time = 5.229376[s]  
Temp\_Get = 23.2 [dC]

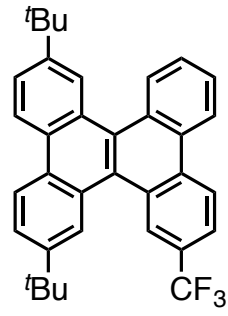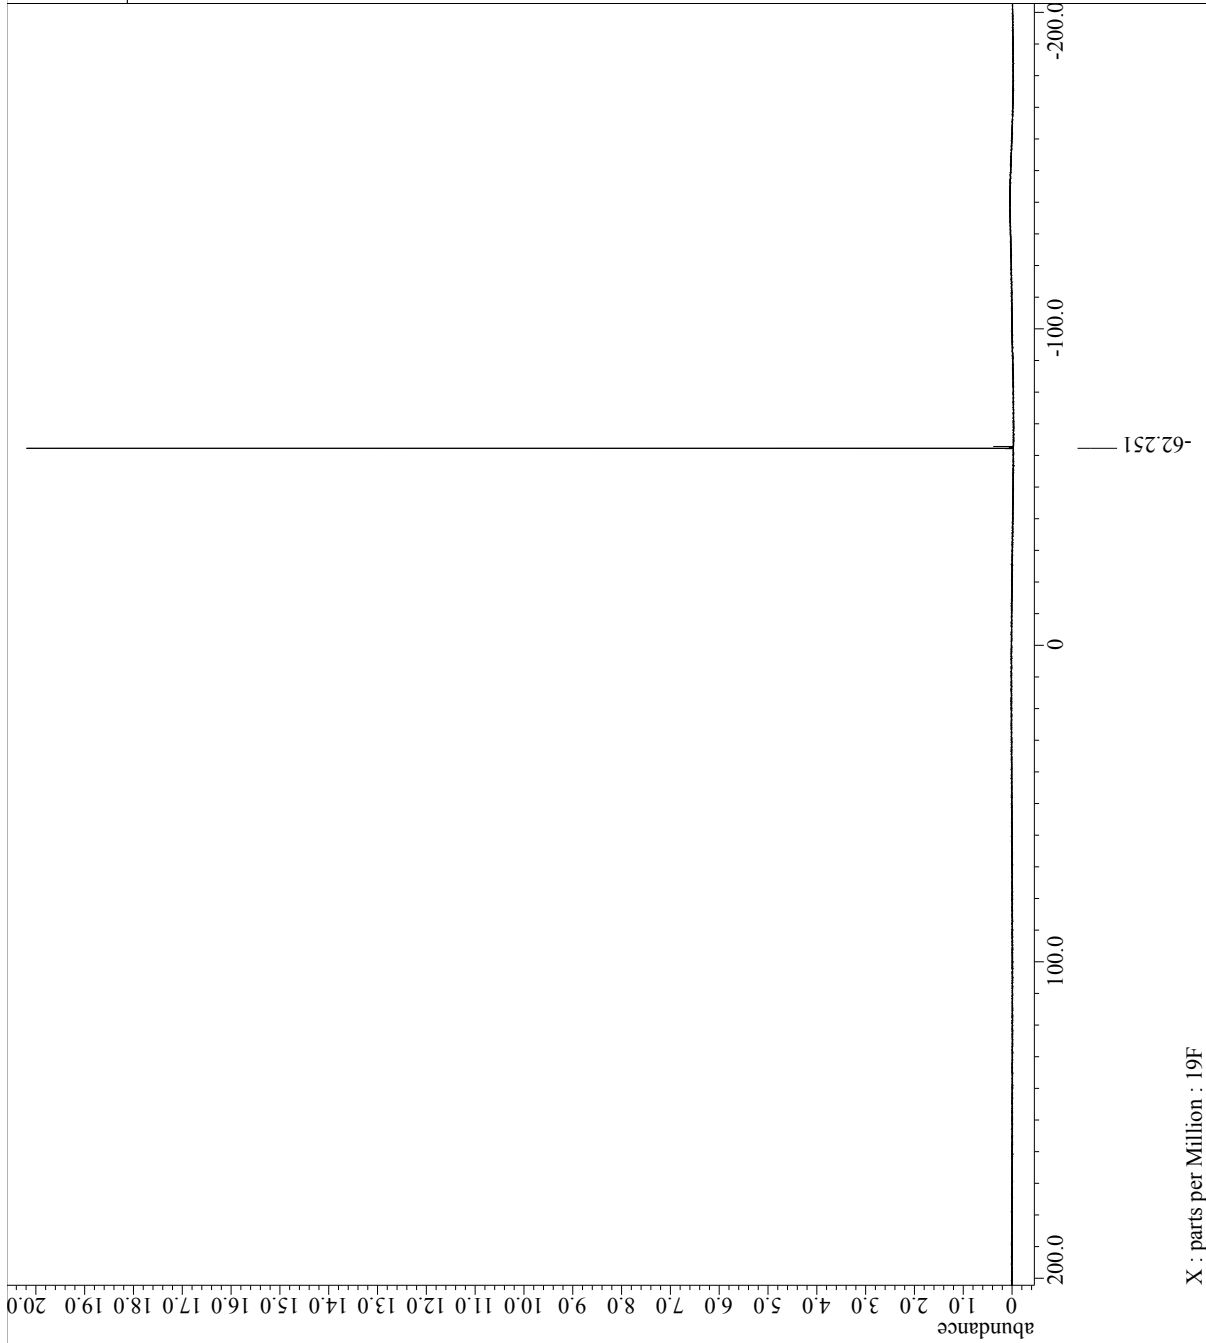

Supplementary Figure 9. <sup>19</sup>F NMR (565 MHz, CDCl<sub>3</sub>) of 3ab

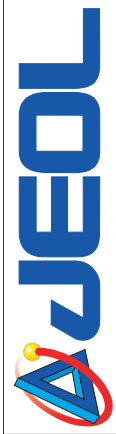

```

/Users/kyohei.ozaki/Desktop
= itami
= single_pulse.ex2
= S#85796
= CHLOROFORM-D
= 20-NOV-2014 02:28:30
= 20-NOV-2014 01:19:30
= 20-NOV-2014 01:19:43
= single_pulse
= 1D COMPLEX
= 26214
= 1H
= [ppm]
= X
= ECA600
= JNM-ECA600
= 14.08462569[T] (600[MHz])
= 2.9097984[s]
= 1H
= 599.67230511[MHz]
= 5[ppm]
= 32768
= 1
= 0.34366642[Hz]
= 11.26126126[kHz]
= 1H
= 599.67230511[MHz]
= 5[ppm]
= 1H
= 599.67230511[MHz]
= 5[ppm]
= FALSE
= 8
= 8
= 13.8[us]
= 2.9097984[s]
= 45[deg]
= 3.3[dB]
= 6.9[us]
= Off
= Off
= Dants Presat
= FALSE
= 1[s]
= 44
= 7[s]
= 7.9097984[s]
= 24.4[deg]
  
```

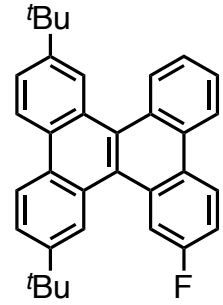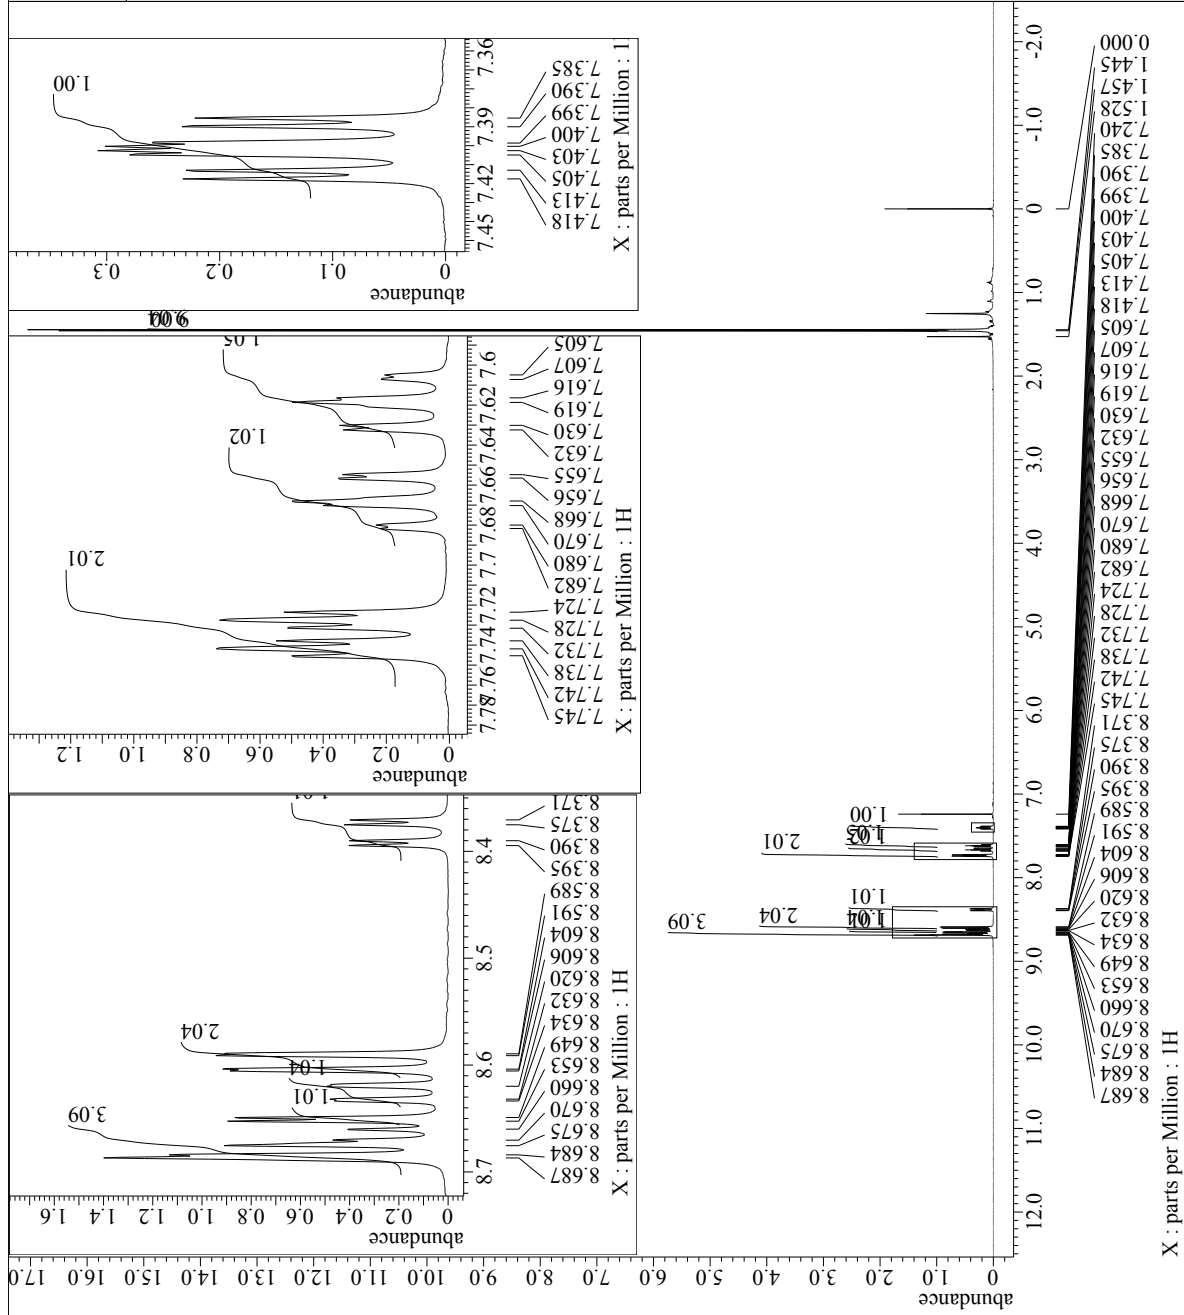

Supplementary Figure 10. <sup>1</sup>H NMR (600 MHz, CDCl<sub>3</sub>) of 3ac

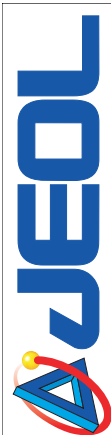

```

= /Users/kyohsuzaki/Desktop
= file:
= single_pulse_dec
= S#92057
= CHLOROFORM-D
= 3-OCT-2014 02:55:26
= 20-NOV-2014 01:07:23
= 20-NOV-2014 01:08:00

Comment = single pulse decoupled gat
Data_Format = 1D COMPLEX
Dim_Size = 26214
Dim_Title = 13C
Dim_Units = [ppm]
Dimensions = X
Site = ECA600
Spectrometer = JNM-ECA600

Field_Strength = 14.08462569 [T] (600 [MHz])
X_Acq_Duration = 0.69206016 [s]
X_Domain = 13C
X_Freq = 150.78770543 [MHz]
X_Offset = 100 [ppm]
X_Points = 32768
X_Prescans = 4
X_Resolution = 1.44496109 [Hz]
X_Sweep = 47.34848485 [kHz]
Irr_Domain = 1H
Irr_Freq = 599.67230511 [MHz]
Irr_Offset = 5 [ppm]
Mod_Return = FALSE
Scan = 446
Total_Scans = 446

X_90_Width = 11.6 [us]
X_Acq_Time = 0.69206016 [s]
X_Angle = 30 [deg]
X_Atn = 7.8 [dB]
X_Pulse = 3.86666667 [us]
Irr_Atn_Dec = 18.119 [dB]
Irr_Atn_Noise = 18.119 [dB]
Decoupling = WALTZ
Initial_Wait = 1 [s]
Noe_Time = TRUE
Noe_Delay = 2 [s]
Recvr_Gain = 60
Relaxation_Delay = 2 [s]
Relaxation_Time = 2.69206016 [s]
Temp_Get = 25.2 [dC]
  
```

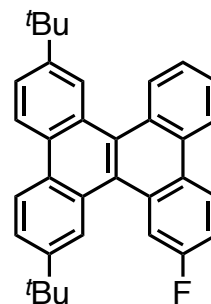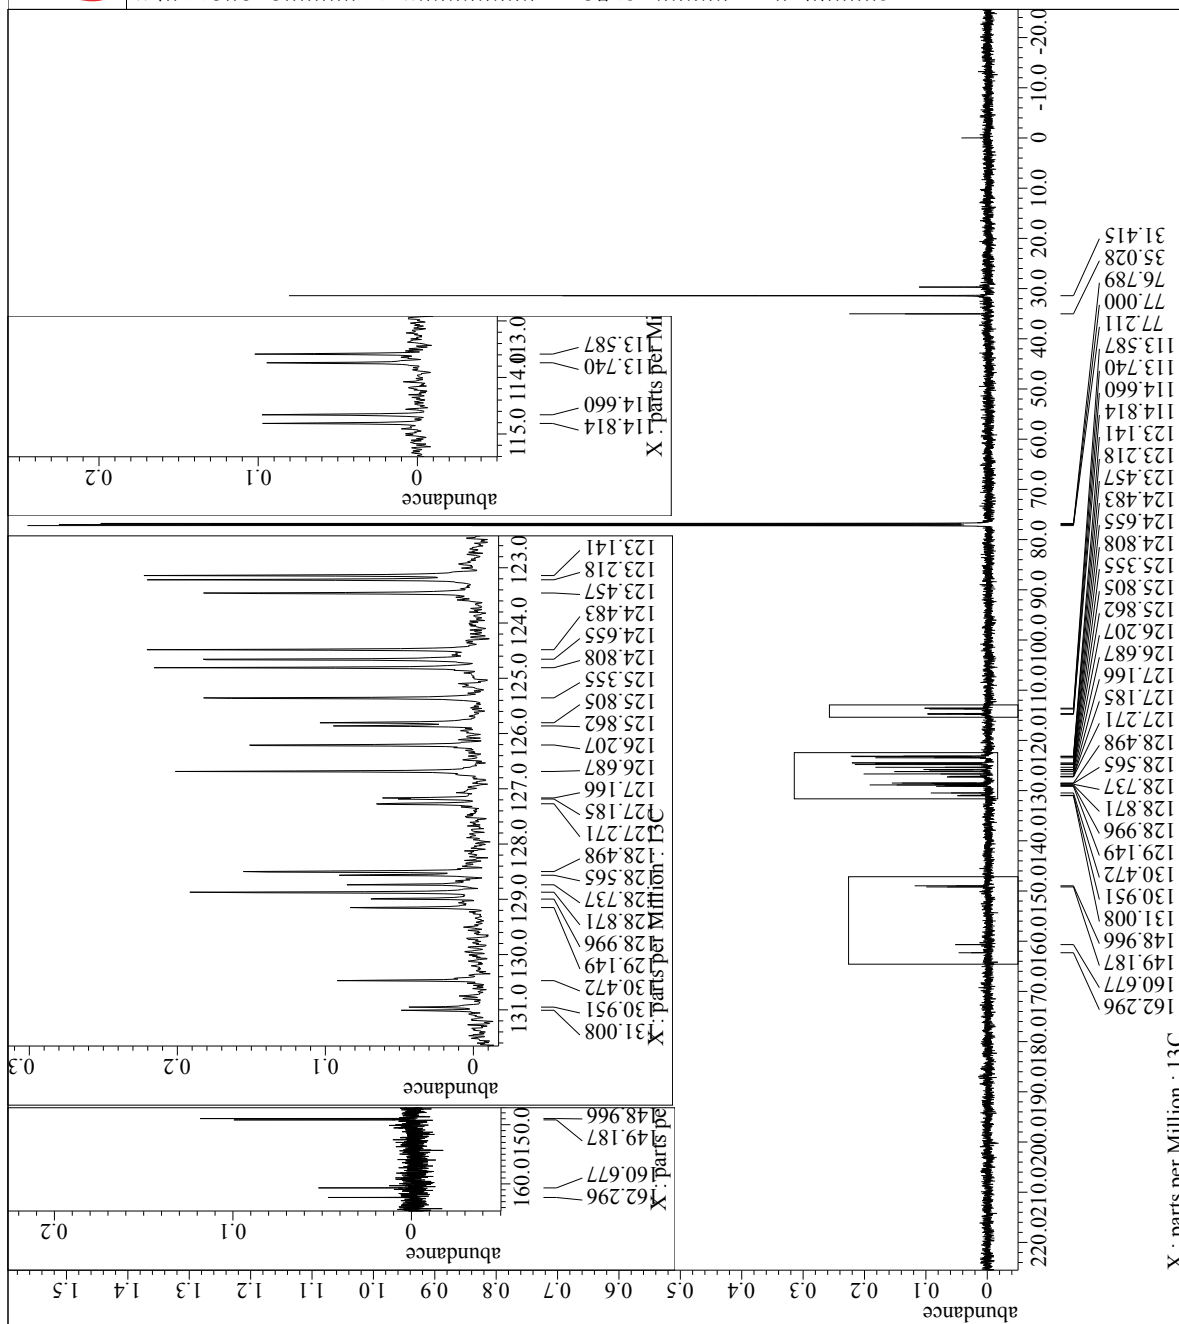

Supplementary Figure 11. <sup>13</sup>C NMR (150 MHz, CDCl<sub>3</sub>) of 3ac

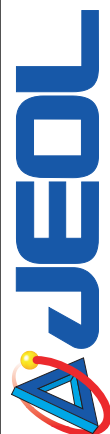

Filename = /Users/kyoheiozaki/Desktop  
Title =  
Experiment = single\_pulse\_ex2  
Sample Id = single\_pulse-19F  
Solvent = CHLOROFORM-D  
Creation\_Time = 19-NOV-2014 01:37:38  
Revision\_Time = 20-NOV-2014 11:24:02  
Current\_Time = 20-NOV-2014 11:25:51  
Comment = single\_pulse-19F  
Data\_Format = 1D COMPLEX  
Dim\_Size = 52428  
Dim\_Title =  
Dim\_Units = 19F  
Dimensions = [ppm]  
Site = X  
Spectrometer = ECA 600  
DELTA2\_NMR =  
Field\_Strength = 14.09636928[T] (600 [MHz])  
X\_Acq\_Duration = 1.229376 [s]  
X\_Domain = 19F  
X\_Freq = 564.72611656 [MHz]  
X\_Offset = 0 [ppm]  
X\_Points = 65536  
X\_Prescans = 1  
X\_Resolution = 4.35965402 [Hz]  
X\_Sweep = 285.71428571 [kHz]  
Irr\_Domain = 19F  
Irr\_Freq = 564.72611656 [MHz]  
Irr\_Offset = 5 [ppm]  
Tr1\_Domain = 19F  
Tr1\_Freq = 564.72611656 [MHz]  
Tr1\_Offset = 5 [ppm]  
Clipped = FALSE  
Mod\_Return = 1  
Scans = 1  
Total\_Scans = 8  
X\_90\_Width = 15.5 [us]  
X\_Acq\_Time = 0.229376 [s]  
X\_Angle = 0.9 [deg]  
X\_Pulse = 7.75 [us]  
Tr1\_Mode = Off  
Tr1\_Offset = Off  
DnTe\_Preset = FALSE  
Initial\_Wait = 1 [s]  
Recvr\_Gain = 78  
Relaxation\_Delay = 5 [s]  
Repetition\_Time = 5.229376 [s]  
Temp\_Get = 23.8 [dC]

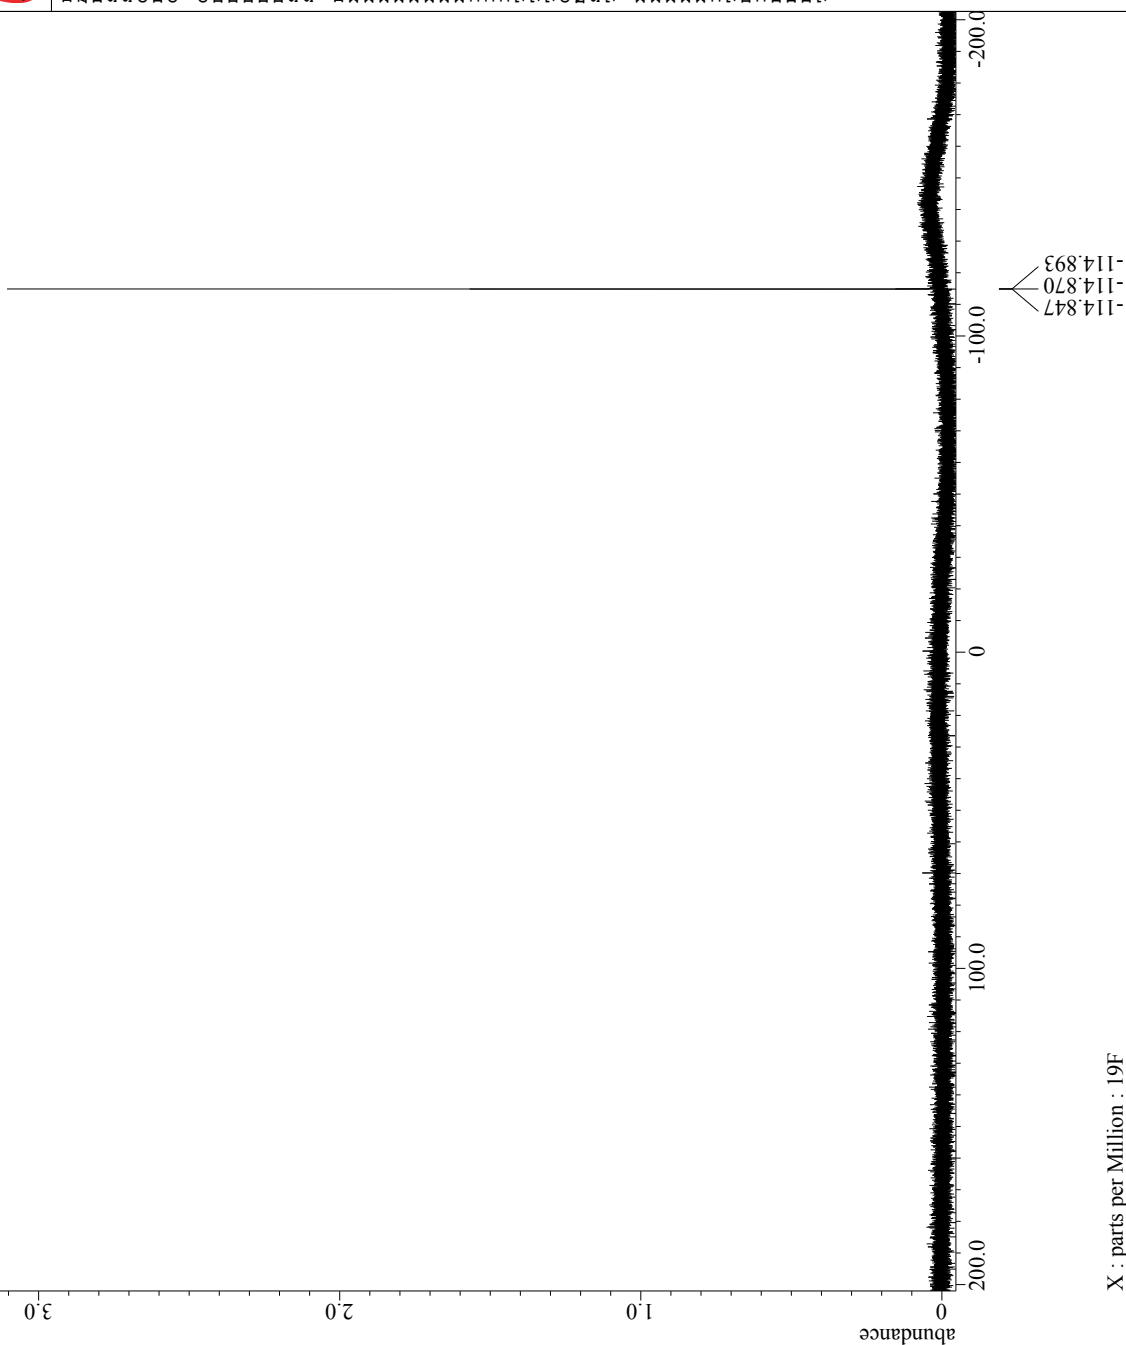

Supplementary Figure 12.  $^{19}\text{F}$  NMR (565 MHz,  $\text{CDCl}_3$ ) of 3ac

```

/Users/kyoheiozaki/Desktop
= itami
Experiment single_pulse.ex2
Sample Id S#709336
Solvent CHLOROFORM-D
Creation_Time 17-DEC-2012 19:30:14
Revision_Time 30-SEP-2014 23:46:00
Current_Time 30-SEP-2014 23:46:04

Comment = single_pulse
Data Format = JD COMPLEX
Dim Size = 26214
Dim Title = H
Dim Units = [ppm]
Dimensions = X
Site = ECA600
Spectrometer = JNM-ECA600

Field Strength = 14.08462569[T] (600[MHz])
X_Acq_Duration = 2.9097984[s]
X_Domain = 1H
X_Freq = 599.67230511[MHz]
X_Offset = 5[ppm]
X_Points = 32768
X_Prescans = 1
X_Resolution = 0.34366642[Hz]
X_Sweep = 11.26126126[kHz]
Irr_Domain = 1H
Irr_Freq = 599.67230511[MHz]
Irr_Offset = 5[ppm]
Tri_Domain = 1H
Tri_Freq = 599.67230511[MHz]
Tri_Offset = 5[ppm]
Clip_Level = FALSE
Mod_Return = 1
Scans = 8
Total_Scans = 8

X_90_Width = 14.2[us]
X_Acq_Time = 2.9097984[s]
X_Angle = 45[deg]
X_Atn = 3.3[dB]
X_Pulse = 7.1[us]
Irr_Mode = Off
Tri_Mode = Off
Dante_Preset = FALSE
Initial_Wait = 1[s]
Recvr_Gain = 40
Relaxation_Delay = 5[s]
Repetition_Time = 2.9097984[s]
Temp_Get = 22[degC]

```

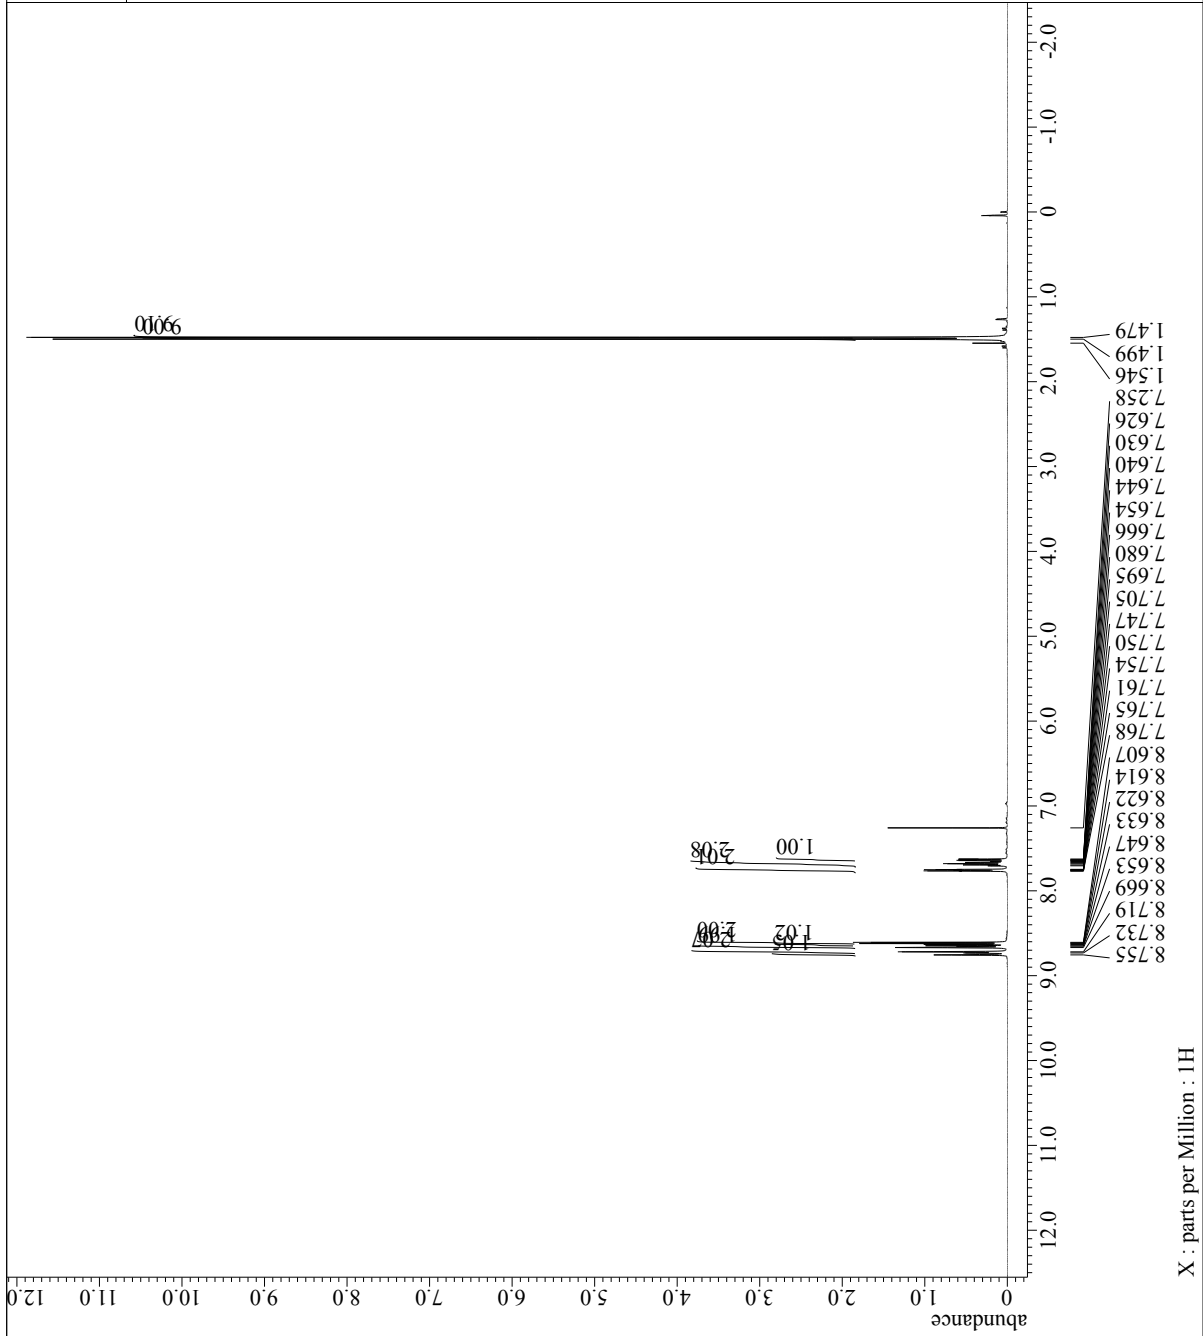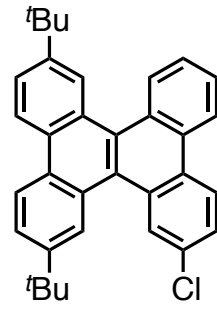

Supplementary Figure 13.  $^1\text{H}$  NMR (600 MHz,  $\text{CDCl}_3$ ) of 3ad

```

= /Users/kyoheiozaki/desktop
File Name =
Author = itami
Experiment = single_pulse_dec
Sample_Id = #F711155
Solvent = CHLOROFORM-D
Creation_Time = 20-NOV-2014 01:26:01
Revision_Time = 20-NOV-2014 01:26:46
Current_Time = 20-NOV-2014 01:25:17
Comment = single pulse decoupled gat
Data Format = 1D COMPLEX
Dim Size = 26214
Dim Title = 13C
Dim Units = [ppm]
Dimensions = X
Site = ECA600
Spectrometer = JNM-ECA600
Field_Strength = 14.08462569 [T] (600 [MHz])
Acq_Duration = 5.69206016 [s]
X_Freq = 150.78770543 [MHz]
X_Offset = 100 [ppm]
X_Points = 32768
X_Prescans = 4
X_Resolution = 1.44496109 [Hz]
X_Sweep = 47.34848485 [kHz]
Irr_Domain = 1H
Irr_Freq = 599.67230511 [MHz]
Irr_Offset = 5 [ppm]
Clipped = FALSE
Mod_Return = 1
Scans = 512
Total_Scans = 512
X_90_Width = 11.2 [us]
X_Acq_Time = 0.69206016 [s]
X_Angle = 30 [deg]
X_Atn = 7.8 [dB]
X_Pulse = 3.73333333 [us]
Irr_Atn_Dec = 17.871 [dB]
Irr_Atn_Noise = 17.871 [dB]
Decoupling = WALTZ
Initial_Wait = TRUE
Noe_Time = 1 [s]
Noe_Delay = TRUE
Recvr_Gain_Delay = 2 [s]
Relaxation_Delay = 90 [s]
Relaxation_Time = 2.69206016 [s]
Temp_Get = 23.4 [dC]
  
```

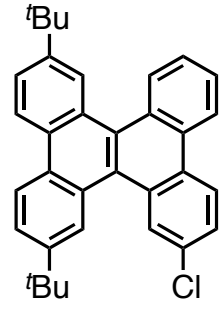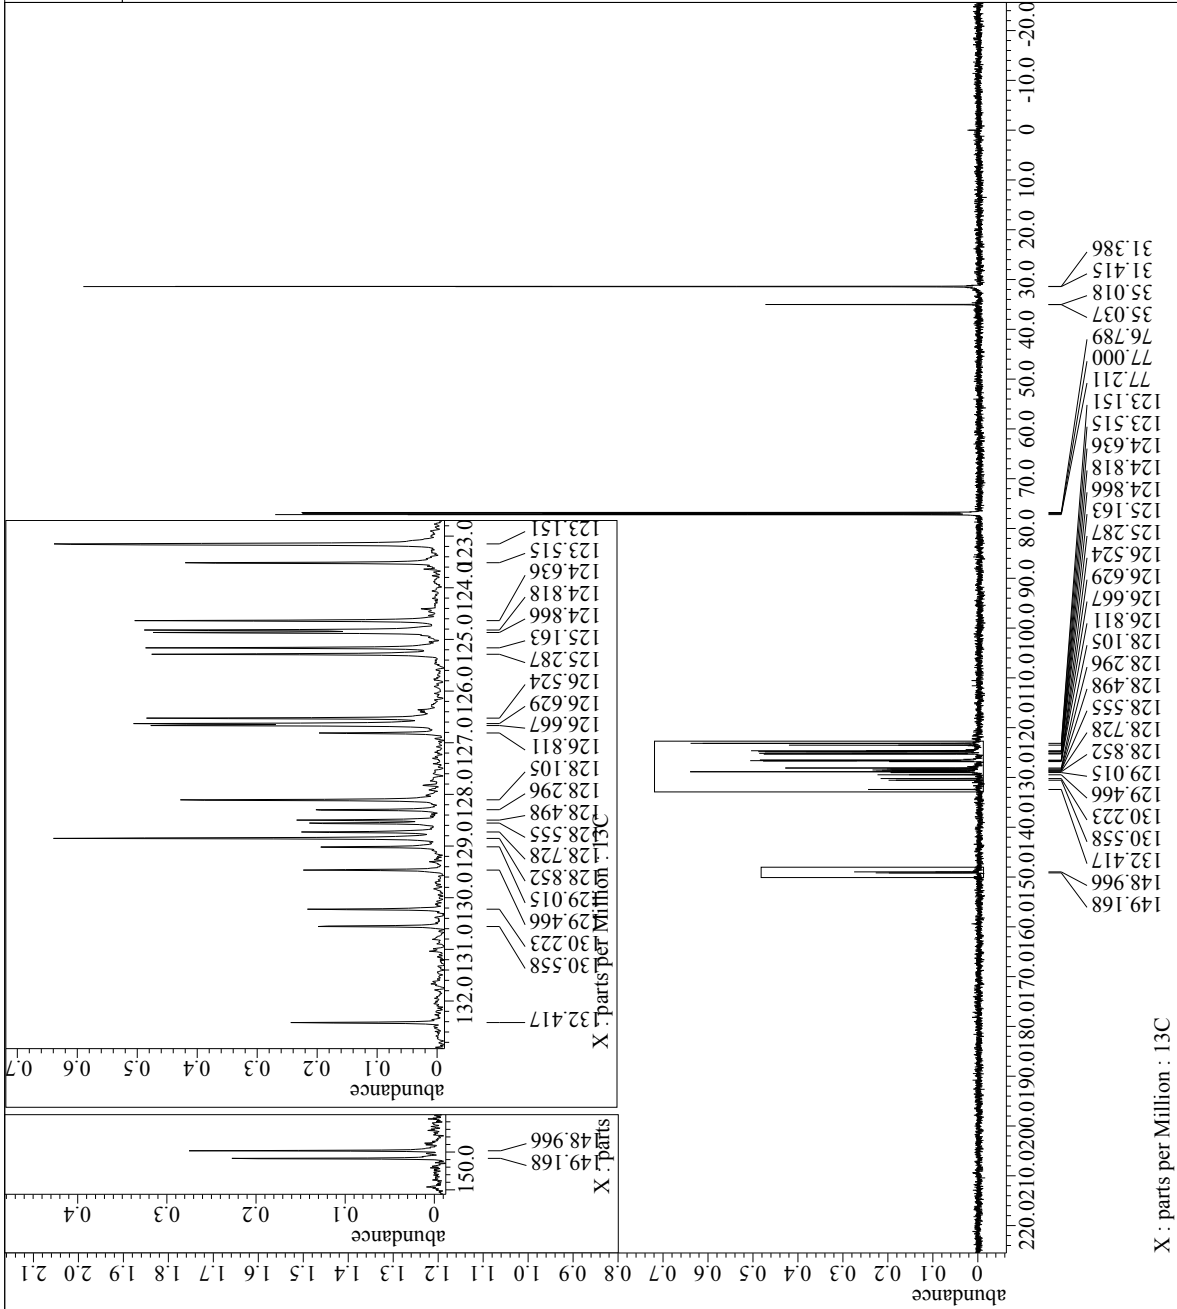

Supplementary Figure 14. <sup>13</sup>C NMR (150 MHz, CDCl<sub>3</sub>) of 3ad

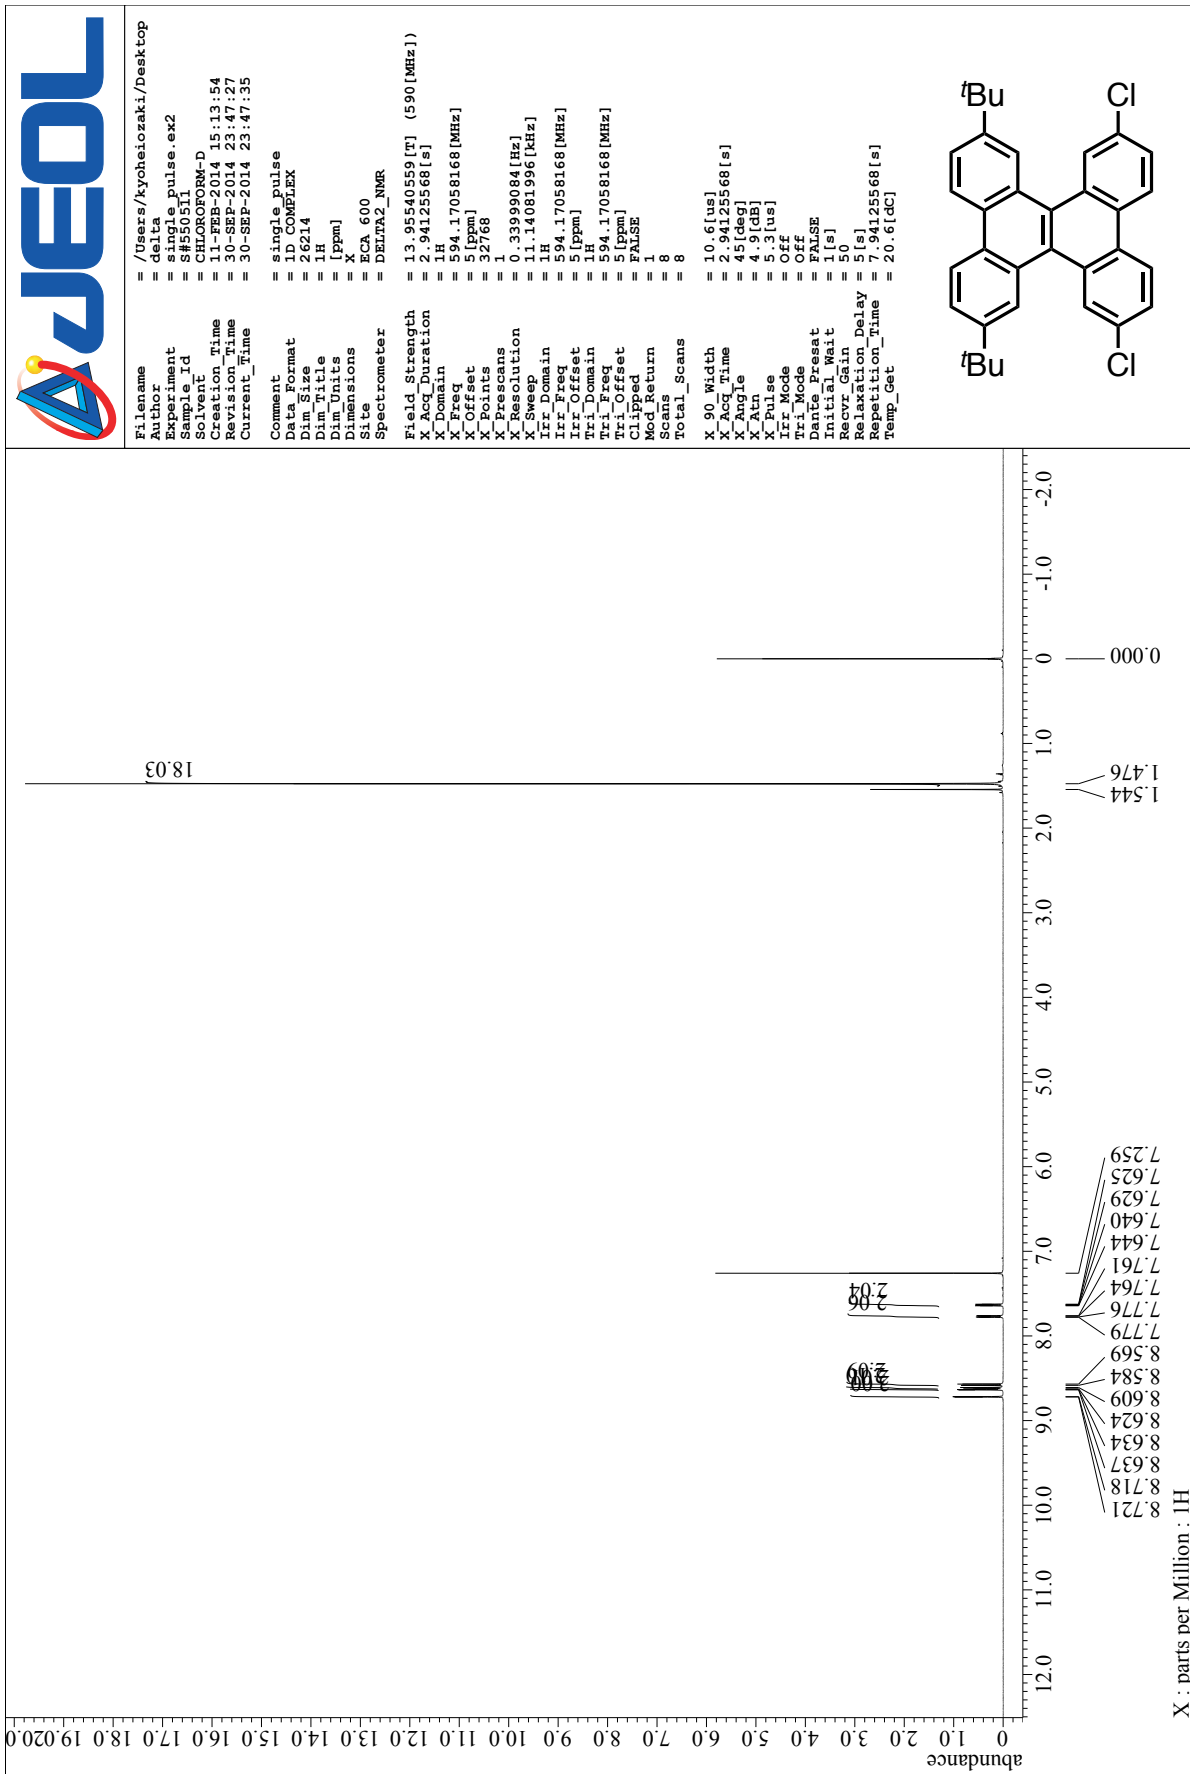

Supplementary Figure 15. <sup>1</sup>H NMR (600 MHz, CDCl<sub>3</sub>) of 3ae

```

File Name      = /Users/kyoheiozaki/desktop
Author        = delta
Experiment    = carbon_jxp
Sample Id     = ez2-300-GPC-5_CDCl3_600C
Solvent       = CHLOROFORM-D
Creation Time = 11-FEB-2014 23:03:49
Revision Time = 20-NOV-2014 01:26:30
Current Time  = 20-NOV-2014 01:26:37

Comment       = single pulse decoupled gat
Data Format   = ID COMPLEX
Dim Size     = 26214
Dim Title    = Carbon13
Dim Units    = [ppm]
Dimensions   = X
Site         = NM-FGA600II
Spectrometer = DELTA_NMR

Field Strength = 14.09636928 [T] (600 [MHz])
X Acq Duration = 0.69206016 [s]
X Domain      = 13C
X Freq        = 150.91343039 [MHz]
X Offset      = 100 [ppm]
X Points      = 32768
X Prescans    = 4
X Resolution  = 1.44496109 [Hz]
X Sweep Clipped = 47.34848485 [kHz]
Irr Domain    = Proton
Irr Freq      = 600.1723046 [MHz]
Irr Offset    = 5 [ppm]
Lock Acquirn  = FALSE
Pulse_Progr   = zgpg30
Pulse_Recovery = 75.0 [us]
Total_Scans   = 127

X 90 Width    = 9.5 [us]
X Acq Time    = 0.69206016 [s]
X Angle       = 30 [deg]
X Atn         = 10.2 [dB]
X Pulse       = 3.16666667 [us]
Irr Atn_Dec  = 19.11 [dB]
Irr Atn_Noise = 19.11 [dB]
Irr Noise     = WALTZ
Irr Fwidth    = 73 [us]
Decoupling    = TRUE
Initial_Wait  = 1 [s]
Acq Time      = TRUE
Relaxation_Delay = 2 [s]
Repetition_Time = 2.69206016 [s]
Temp_Get      = 21.5 [dC]
  
```

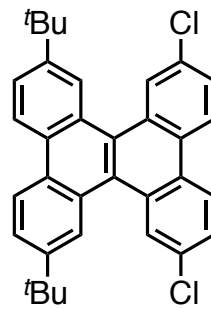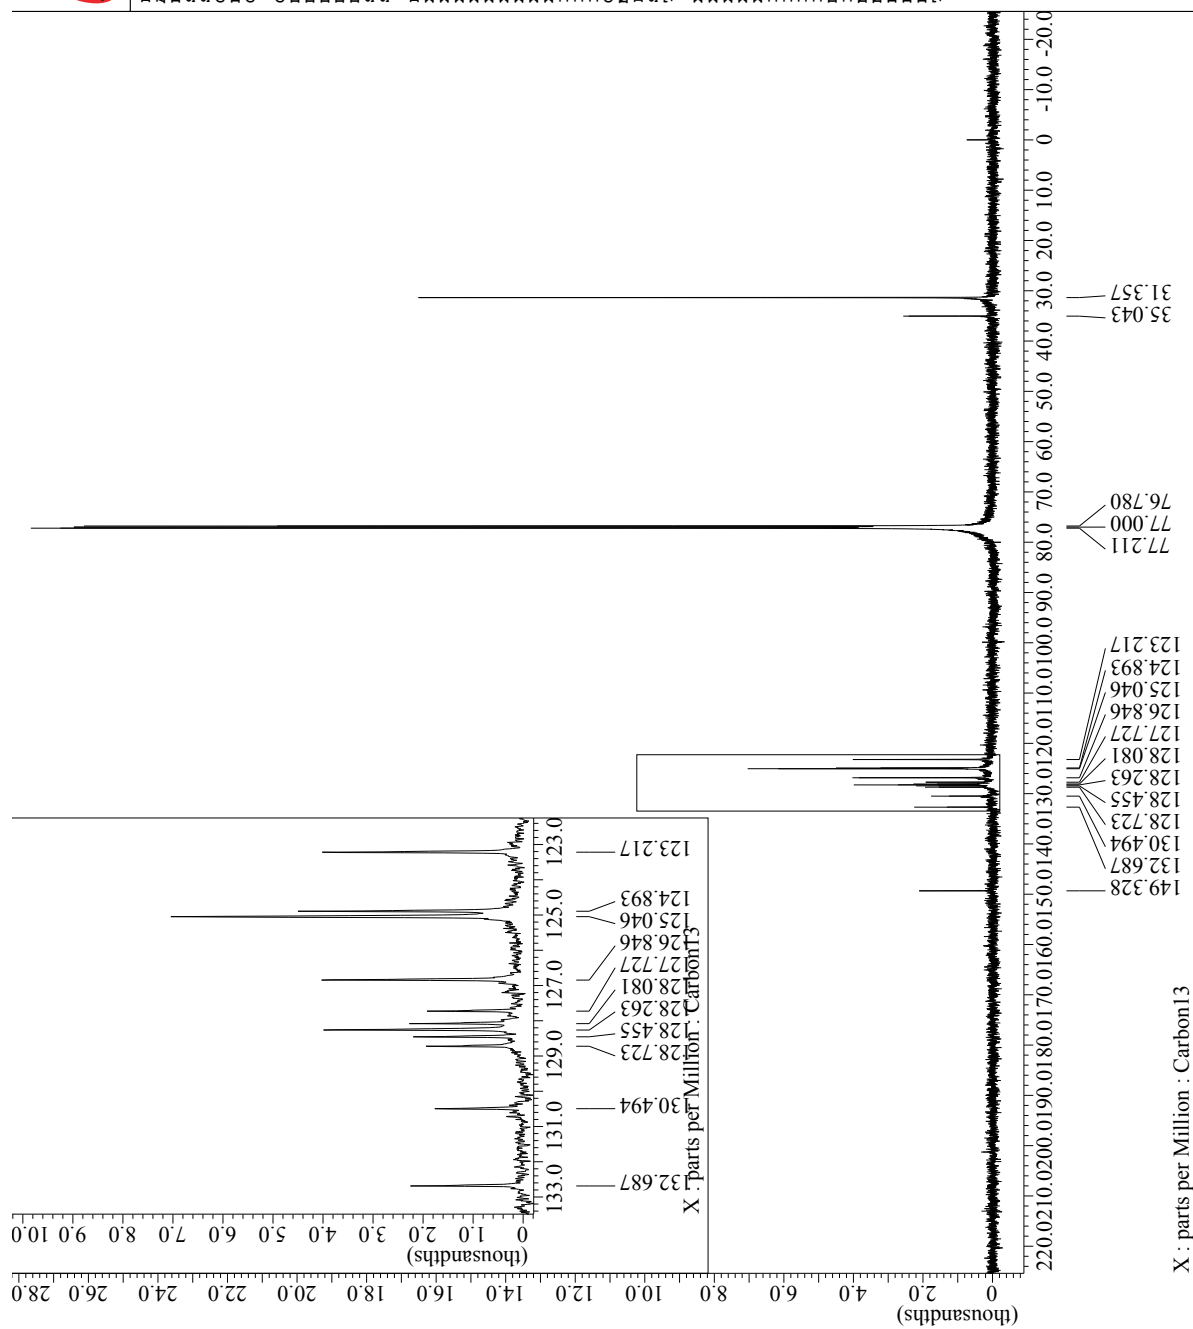

Supplementary Figure 16.  $^{13}\text{C}$  NMR (150 MHz,  $\text{CDCl}_3$ ) of 3ae



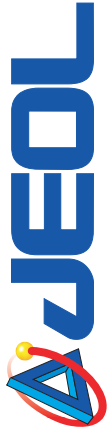

```

/Users/kyohei.ozaki/Desktop
= itami
Experiment single_pulse.ex2
Sample_Id S#8237
Solvent CHLOROFORM-D
Creation_Time 7-SEP-2014 00:19:50
Revision_Time 7-SEP-2014 11:06:28
Current_Time 1-OCT-2014 23:49:11

Comment = single_pulse
Data_Format = ID COMPLEX
Dim_Size = 52428
Dim_Title = H
Dim_Units = [ppm]
Dimensions = X
Site = ECA 600
Spectrometer = DELTA2_NMR

Field_Strength = 14.09636928[T] (600 [MHz])
X_Acq_Duration = 5.8195968[s]
X_Domain = 1H
X_Freq = 600.1723046 [MHz]
X_Offset = 5 [ppm]
X_Points = 65536
X_Prescans = 1
X_Resolution = 0.17183321 [Hz]
X_Sweep = 11.26126126 [kHz]
Irr_Domain = 1H
Irr_Freq = 600.1723046 [MHz]
Irr_Offset = 5 [ppm]
Tri_Domain = H
Tri_Freq = 600.1723046 [MHz]
Tri_Offset = 5 [ppm]
C13_Offset = FALSE
Mod_Return = 1
Scans = 8
Total_Scans = 8

X_90_Width = 14.3 [us]
X_Acq_Time = 5.8195968 [s]
X_Angle = 45 [deg]
X_Atn = 3.8 [dB]
X_Pulse = 7.15 [us]
Irr_Mode = Off
Tri_Mode = Off
Dante_Preset = FALSE
Initial_Wait = 1 [s]
Recvr_Gain = 46
Relaxation_Delay = 5 [s]
Repetition_Time = 10.8195968 [s]
Temp_Get = 25.7 [dC]

```

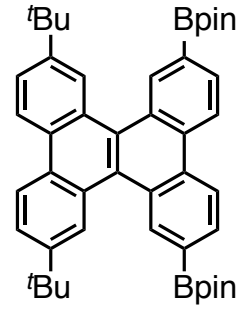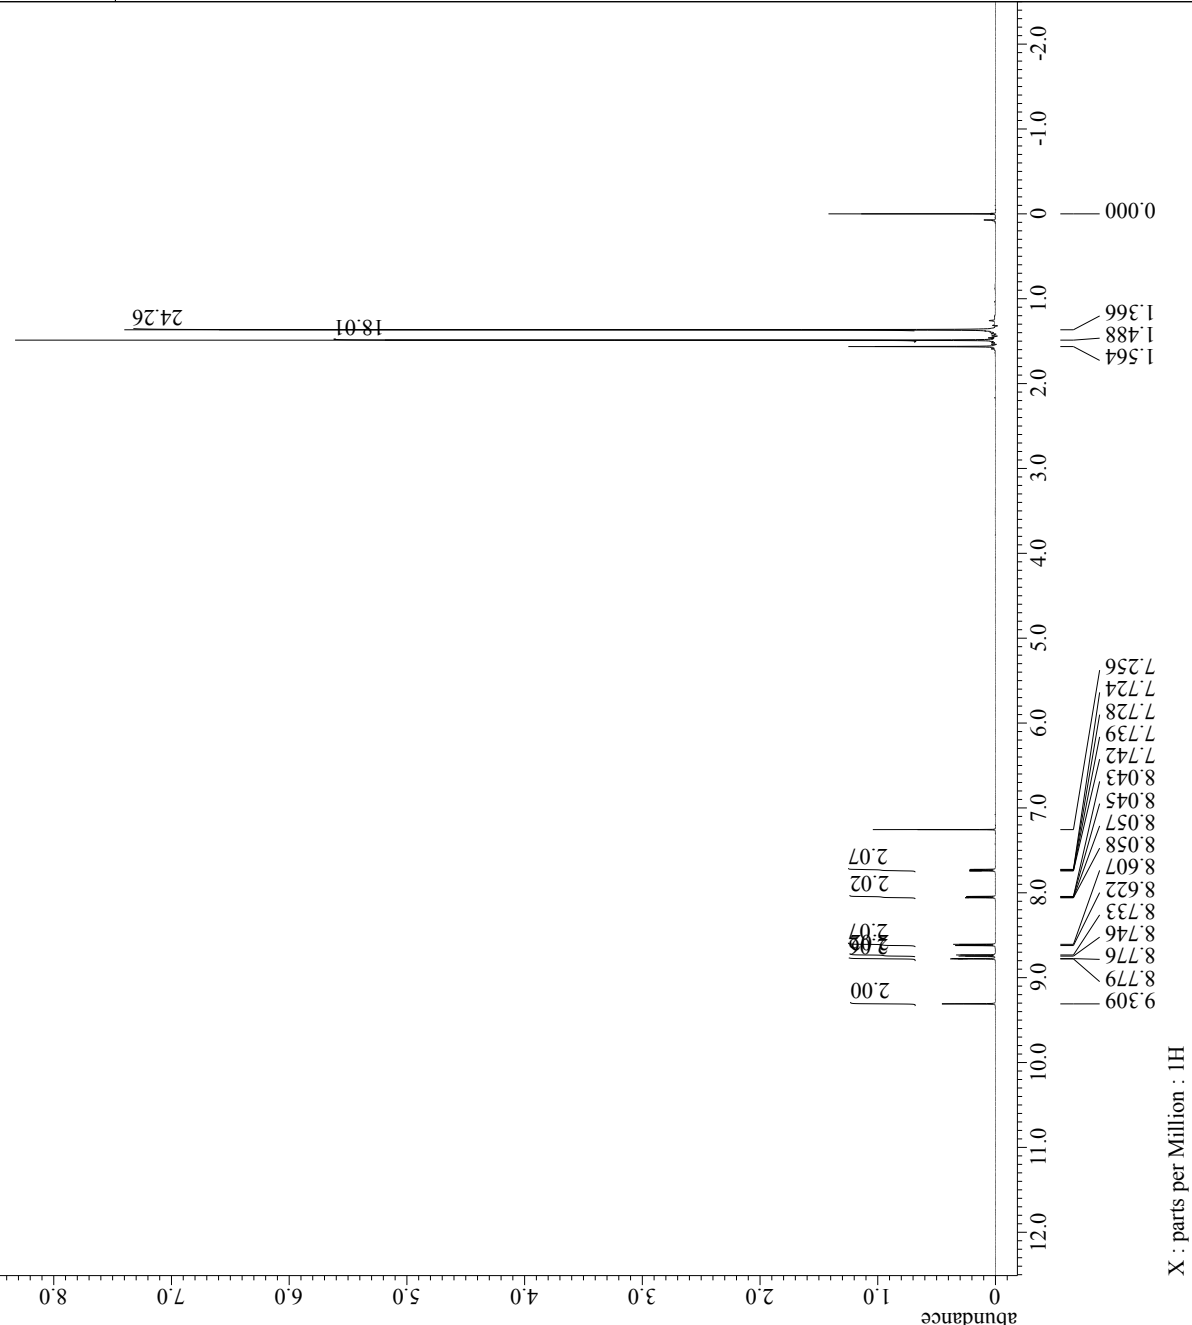

Supplementary Figure 17. <sup>1</sup>H NMR (600 MHz, CDCl<sub>3</sub>) of 3af

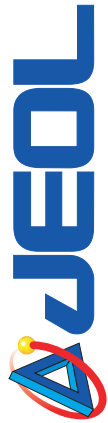

```
File Name = /Users/kyoheiozaki/Desktop
Author = itami
Experiment = single_pulse_dec
Sample_ID =
Solvent = CHLOROFORM-D
Session Time = 7-SEP-2014 11:11:23
Revision Time = 20-NOV-2014 01:27:28
Current Time = 20-NOV-2014 01:27:54
Comment = single pulse decoupled gat
Data Format = 1D COMPLEX
Dim Size = 26214
Dim Title = 13C
Dim Units = [ppm]
Dimensions = X
Site = ECA 600
Spectrometer = DELTA2_NMR
Field Strength = 14.09636928[T] (600 [MHz])
X_Acq_Duration = 0.69206016[s]
X_Domain = 13C
X_Freq = 150.91343039 [MHz]
X_Offset = 100 [ppm]
X_Points = 32768
X_Prescans = 4
X_Resolution = 1.44496109 [Hz]
X_Sweep = 47.34848485 [kHz]
Irr_Domain = 1H
Irr_Freq = 600.1723046 [MHz]
Irr_Offset = 5 [ppm]
X_Return = FALSE
Scan_Return = 1
Total_Scans = 13395
X_90_Width = 11.5 [us]
X_Acq_Time = 0.69206016 [s]
X_Angle = 30 [deg]
X_Atn = 10 [dB]
X_Pulse = 3.83333333 [us]
Irr_Atn_Dec = 18.31 [dB]
Irr_Atn_No = 18.31 [dB]
Decoupling = WALTZ
Initial_Wait = TRUE
Noe_Time = 1 [s]
Reovr_Time = 2 [s]
Relaxation_Delay = 2 [s]
Repetition_Time = 2.69206016 [s]
Temp_Get = 26.7 [dC]
```

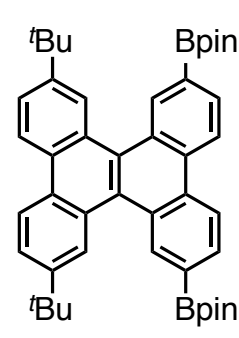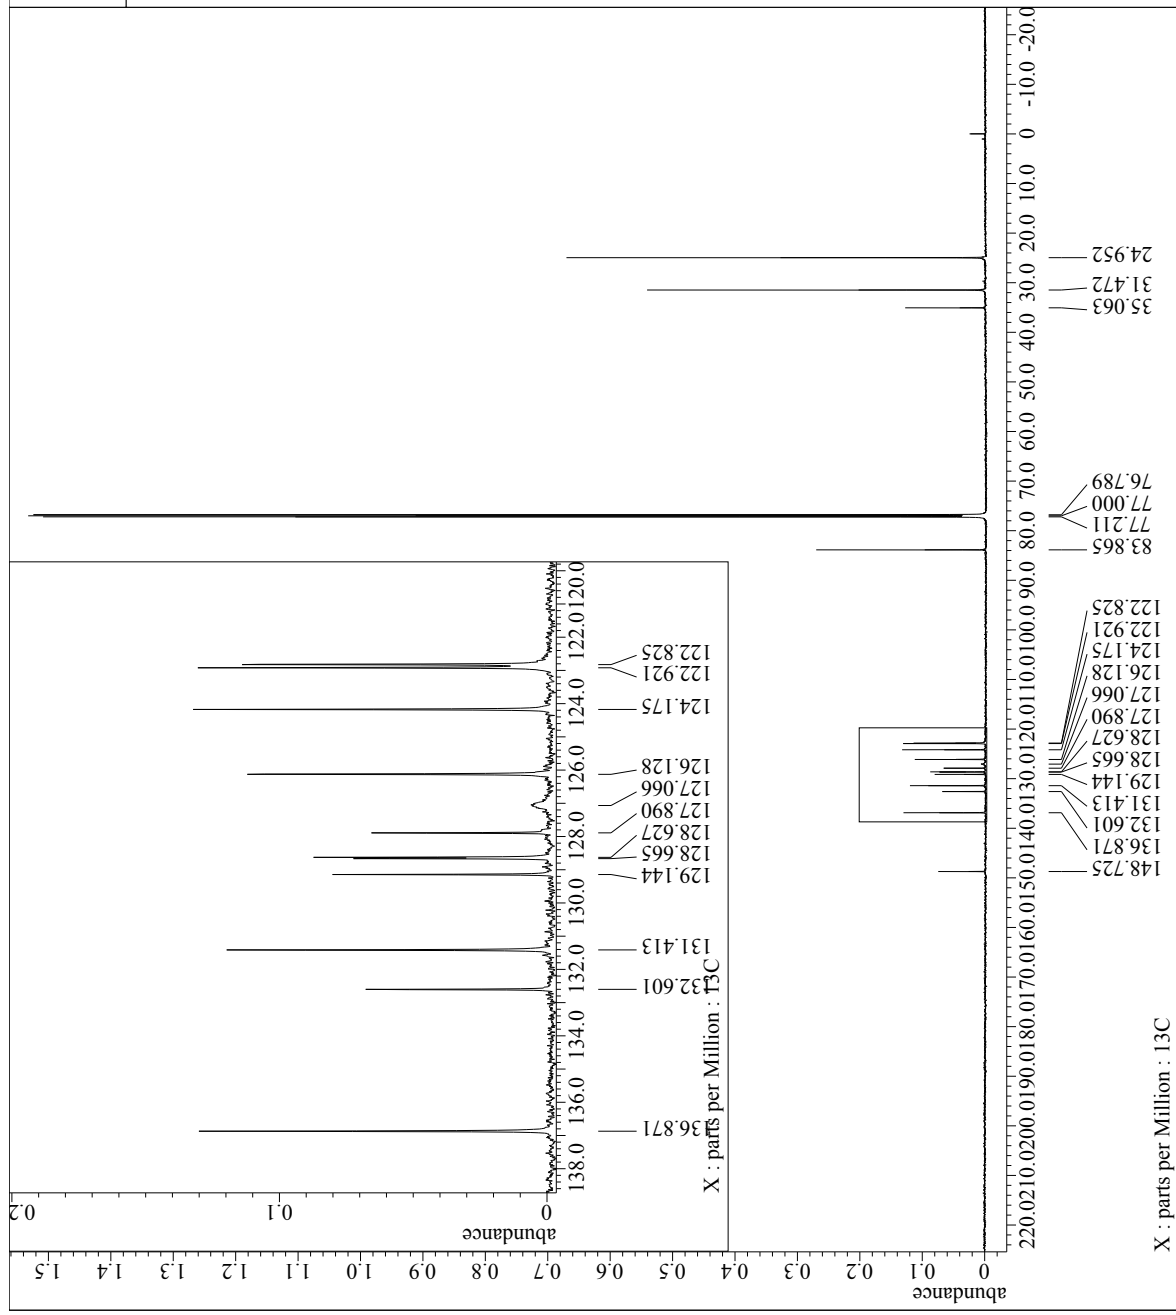

Supplementary Figure 18. <sup>13</sup>C NMR (150 MHz, CDCl<sub>3</sub>) of 3af

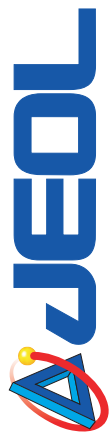

```

/Users/kyoheiozaki/Desktop
= itami
Experiment = single_pulse.ex2
Sample_Id = S#737857
Solvent = CHLOROFORM-D
Creation_Time = 21-DEC-2012 20:17:30
Revision_Time = 1-OCT-2014 00:02:00
Current_Time = 1-OCT-2014 00:02:14

Comment = single_pulse
Data_Format = ID COMPLEX
Dim_Size = 26214
Dim_Title = 1H
Dim_Units = [ppm]
Dimensions = X
Spectrometer = ECA600
= JNM-ECA600

Field_Strength = 14.08462569[T] (600[Mhz])
X_Acq_Duration = 2.9097984[s]
X_Domain = 1H
X_Freq = 599.67230511[MHz]
X_Offset = 5[ppm]
X_Points = 32768
X_Prescans = 1
X_Resolution = 0.34366642[Hz]
X_Sweep = 11.26126126[MHz]
Irr_Domain = 1H
Irr_Freq = 599.67230511[MHz]
Irr_Offset = 5[ppm]
Tri_Domain = 1H
Tri_Freq = 599.67230511[MHz]
Tri_Offset = 5[ppm]
Cli_Read = FALSE
Mod_Return = 1
Scans = 8
Total_Scans = 8

X_90_Width = 14.2[us]
X_Acq_Time = 2.9097984[s]
X_Angle = 45[deg]
X_Atn = 3.3[dB]
X_Pulse = 7.1[us]
Irr_Mode = Off
Tri_Mode = Off
Dants_Preset = FALSE
Initial_Wait = 1[s]
Recvr_Gain = 88
Relaxation_Delay = 7[s]
Repetition_Time = 7.9097984[s]
Temp_Get = 24.8[degC]

```

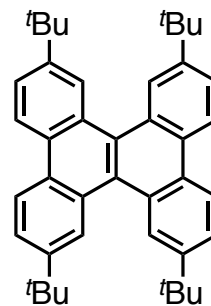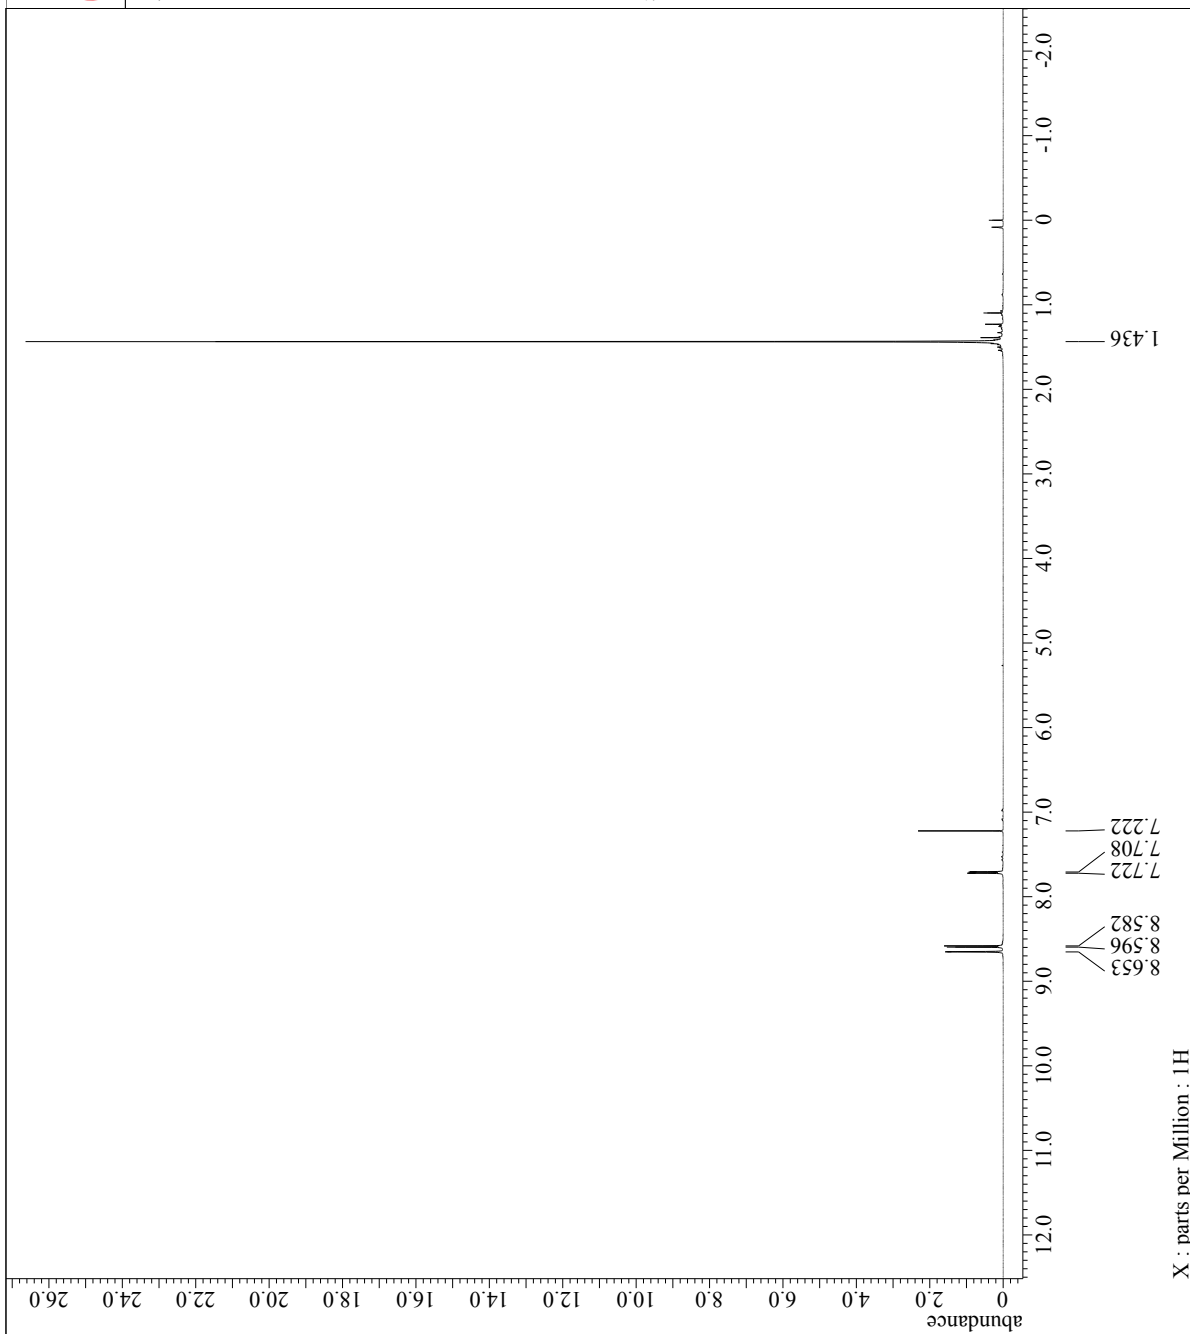

Supplementary Figure 19. <sup>1</sup>H NMR (600 MHz, CDCl<sub>3</sub>) of 3ag

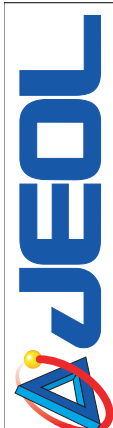

```

/Users/kyoheiozaki/Desktop
=====
Filename =
Path =
Experiment =
Sample_Id = S#73937
Solvent = CHLOROFORM-D
Creation_Time = 21-DEC-2012 21:06:00
Revision_Time = 20-NOV-2014 01:29:10
Current_Time = 20-NOV-2014 01:29:27
=====
Comment = single pulse decoupled gat
Data_Format = 1D COMPLEX
Dim_Size = 26214
Dim_Title =
Dim_Units = 13C
Dimensions = X
Site = ECA600
Spectrometer = JNM-ECA600
=====
Field_Strength = 14.08462569[T] (600 [MHz])
X_Acq_Duration = 0.69206016[s]
X_Domain = 13C
X_Freq = 150.78770543 [MHz]
X_Offset = 100 [ppm]
X_Points = 32768
X_Prescans = 4
X_Resolution = 1.44496109 [Hz]
X_Sweep = 47.34848485 [kHz]
Irr_Domain = 1H
Irr_Freq = 599.67230511 [MHz]
Irr_Offset = 5 [ppm]
Clipped = FALSE
Mod_Return = 1
Scans = 1024
Total_Scans = 1024
=====
X_90_Width = 11.2 [us]
X_Acq_Time = 0.69206016 [s]
X_Angle = 30 [deg]
X_Atn = 7.8 [dB]
X_Pulse = 3.73333333 [us]
Irr_Atn_Dec = 17.871 [dB]
Irr_Atn_Noise = 17.871 [dB]
Decoupling = WALTZ
Initial_Wait = 1 [s]
Noe_Time = TRUE
Noe_Time = 2 [s]
Recycle_Delay = 0 [s]
Relaxation_Delay = 2 [s]
Repetition_Time = 2.69206016 [s]
Temp_Get = 25.2 [dC]

```

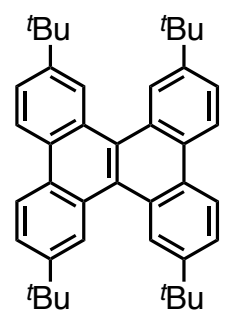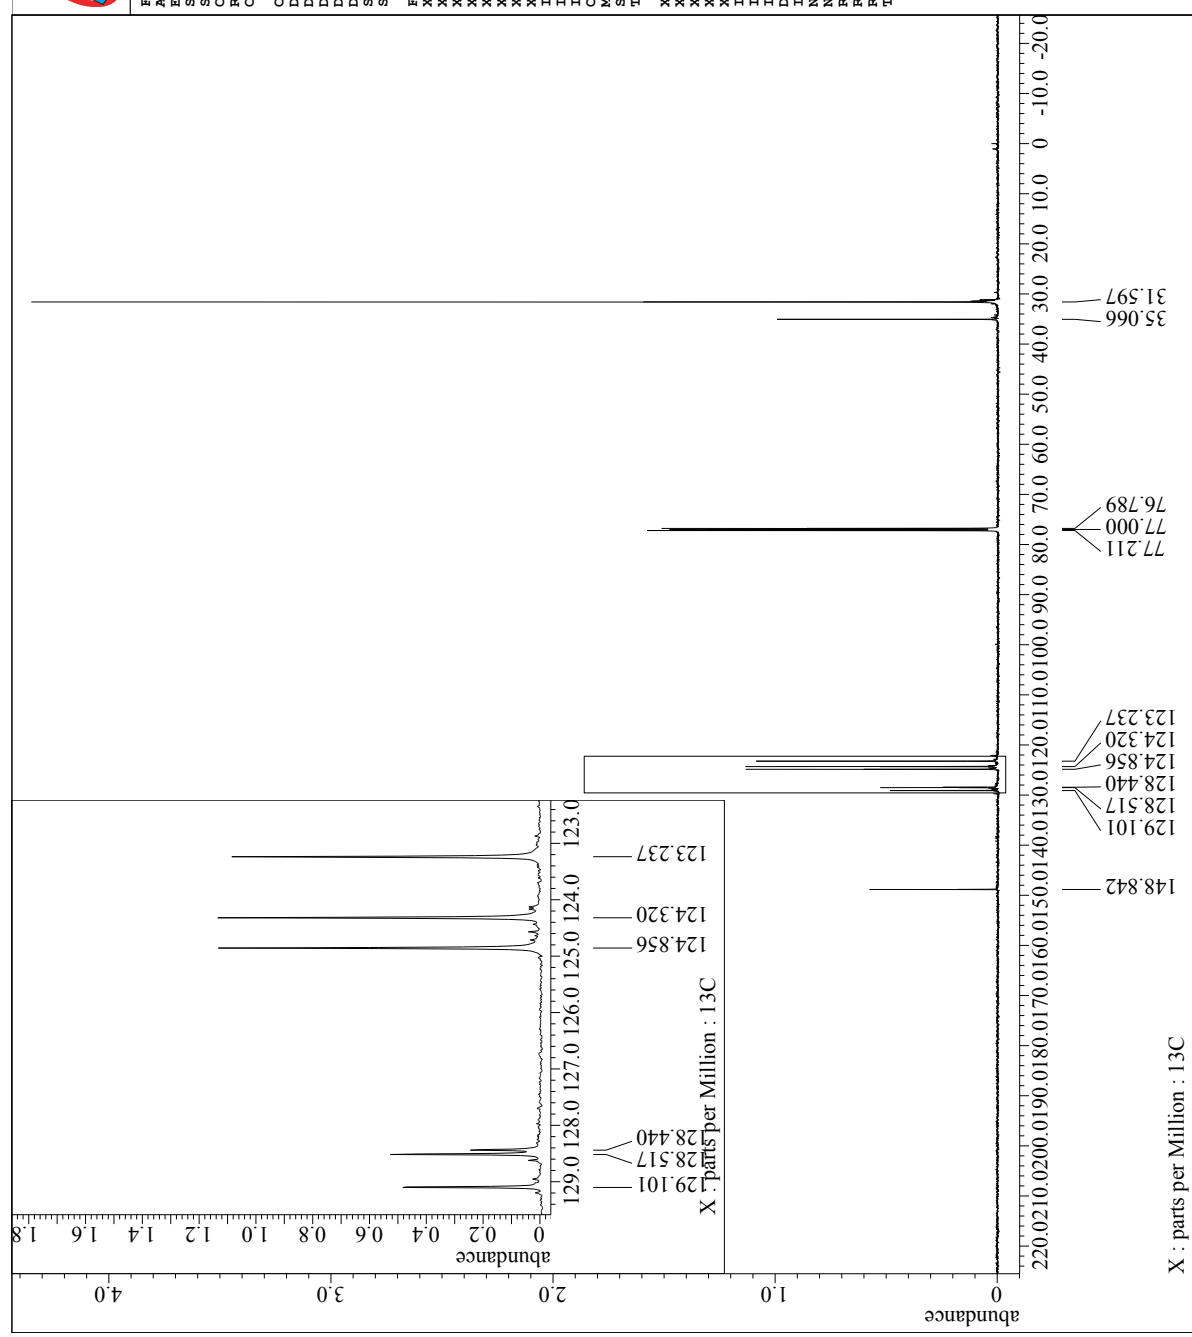

Supplementary Figure 20.  $^{13}\text{C}$  NMR (150 MHz,  $\text{CDCl}_3$ ) of 3ag

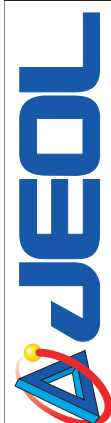

```

= /Users/kyoheiozaki/Desktop
= WPI
= single_pulse.exe
= S#10765
= CHLOROFORM-D
= 19-NOV-2014 00:18:17
= 19-NOV-2014 10:46:04
= 19-NOV-2014 10:51:54
= single_pulse
= ID COMPLEX
= 13107
= 1H
= [ppm]
= X
= ECA600
= JNM-ECA600
Spectrometer
Field Strength = 14.08462569 [T] (600 [MHz])
X_Acq_Duration = 1.4548992 [s]
X_Domain = 1H
X_Freq = 599.67230511 [MHz]
X_Offset = 0.00000000 [ppm]
X_Phase = 163.84
X_Points = 1
X_Prescans = 1
X_Resolution = 0.68733284 [Hz]
X_Sweep = 11.26126126 [kHz]
Irr_Domain = 1H
Irr_Freq = 599.67230511 [MHz]
Irr_Offset = 5 [ppm]
Tri_Domain = 1H
Tri_Freq = 599.67230511 [MHz]
Tri_Offset = 5 [ppm]
Clipped = FALSE
Recd_Return = 1
Scans = 8
Total_Scans = 8
X_90_Width = 13.8 [us]
X_Acq_Time = 1.4548992 [s]
X_Angle = 45 [deg]
X_Atn = 3.3 [dB]
X_Pulse = 6.9 [us]
Irr_Mode = Off
Tri_Mode = Off
Dante_Preset = FALSE
Initial_Wait = 5 [s]
Recvr_Gain_Delay = 5 [s]
Sensitivity = 51
Repetition_Time = 6.4548992 [s]
Temp_Get = 23.2 [dC]

```

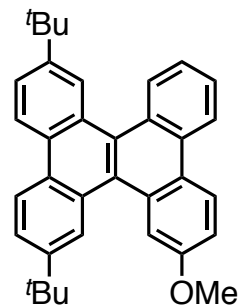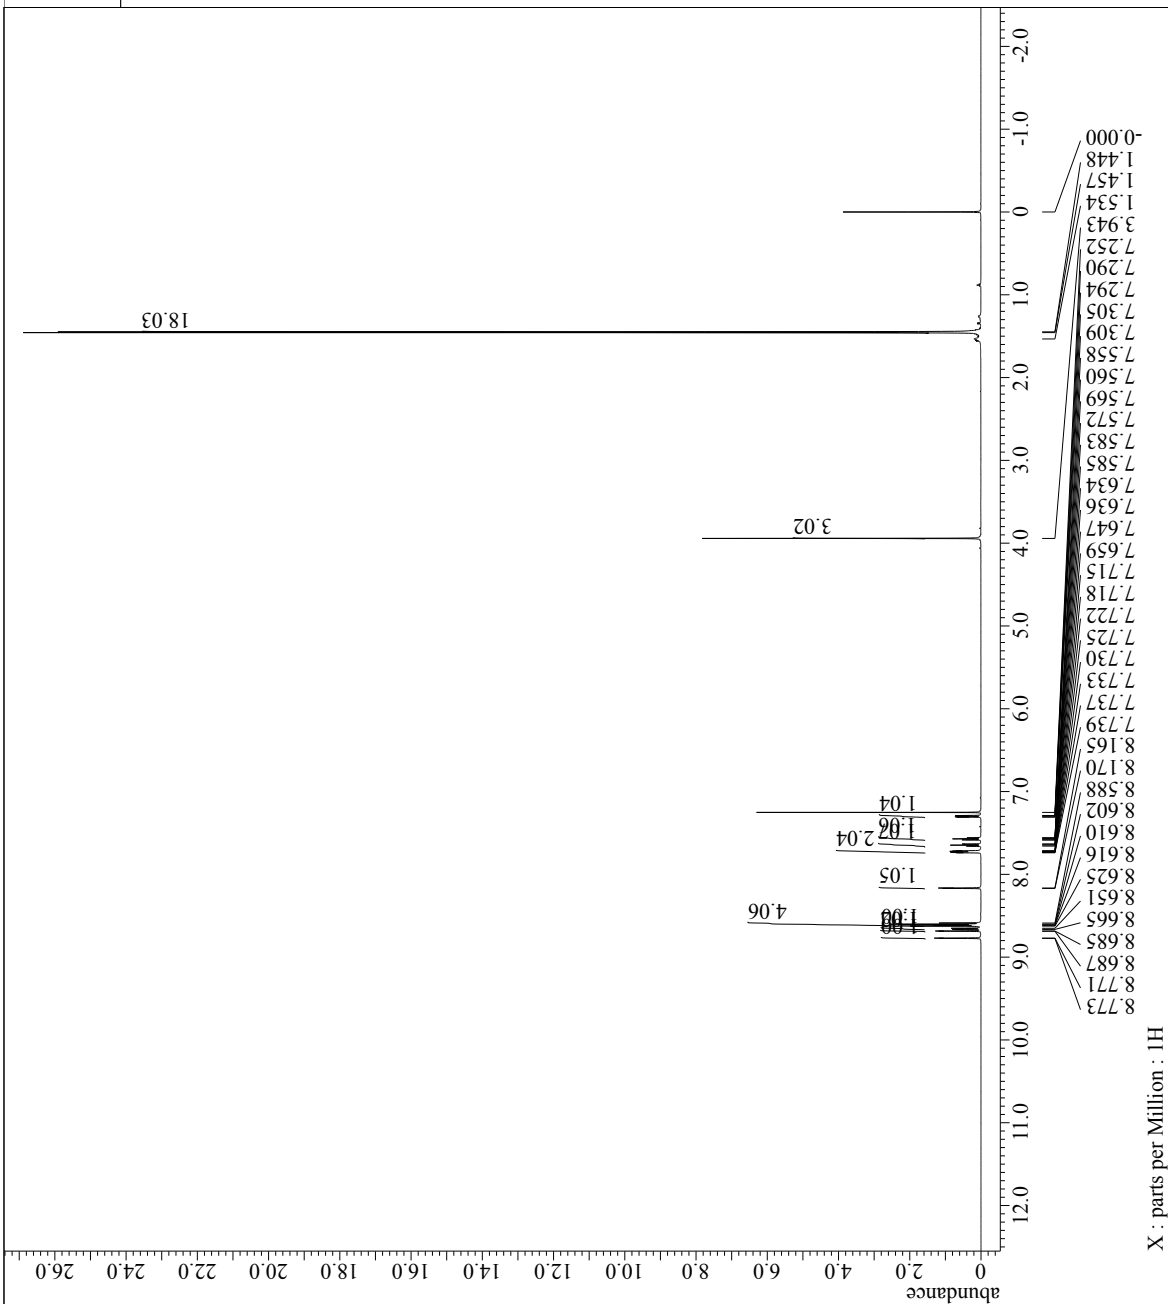

Supplementary Figure 21. <sup>1</sup>H NMR (600 MHz, CDCl<sub>3</sub>) of 3ah

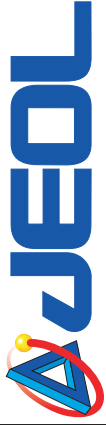

File Name = /Users/kyoheiozaki/desktop  
Author = WFI  
Experiment = single\_pulse\_dec  
Sample Id = 1  
Solvent = CHLOROFORM-D  
Creation\_Time = 19-NOV-2014 02:09:31  
Revision\_Time = 20-NOV-2014 01:33:09  
Current\_Time = 20-NOV-2014 01:33:43  
Comment = single pulse decoupled gat  
Data Format = 3D COMPLEX  
Dim Size = 26214  
Dim Title = 13C  
Dim Units = [ppm]  
Dimensions = X  
Site = ECA600  
Spectrometer = JNM-ECA600  
Field Strength = 14.08462569[T] (600 [MHz])  
X\_AcqDuration = 0.69206016[s]  
X\_Domain = 13C  
X\_Freq = 100.78770543 [MHz]  
X\_Offset = 10.1 [ppm]  
X\_Points = 32768  
X\_Prescans = 4  
X\_Resolution = 1.44496109 [Hz]  
X\_Sweep = 47.34848485 [kHz]  
Irr\_Domain = 1H  
Irr\_Freq = 599.67230511 [MHz]  
Irr\_Offset = 5 [ppm]  
Clipped = FALSE  
Mod\_Return = 1  
Scans = 1840  
Total\_Scans = 1840  
X\_90\_Width = 11.6 [us]  
X\_AcqTime = 0.69206016 [s]  
X\_Angle = 30 [deg]  
X\_Atn = 7.8 [dB]  
X\_Pulse = 3.86666667 [us]  
Irr\_Atn\_Dec = 18.119 [dB]  
Irr\_Atn\_Noise = 18.119 [dB]  
Irr\_Noise = WALTZ  
Decoupling = TRUE  
Initial\_Wait = 1 [s]  
Noe = TRUE  
Noe\_Time = 2 [s]  
Recvr\_Gain = 60  
Relaxation\_Delay = 2 [s]  
Repetition\_Time = 0.69206016 [s]  
Temp\_Get = 23.9 [dC]

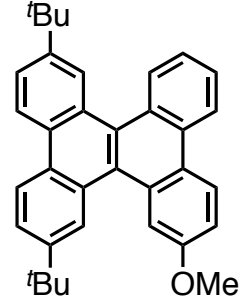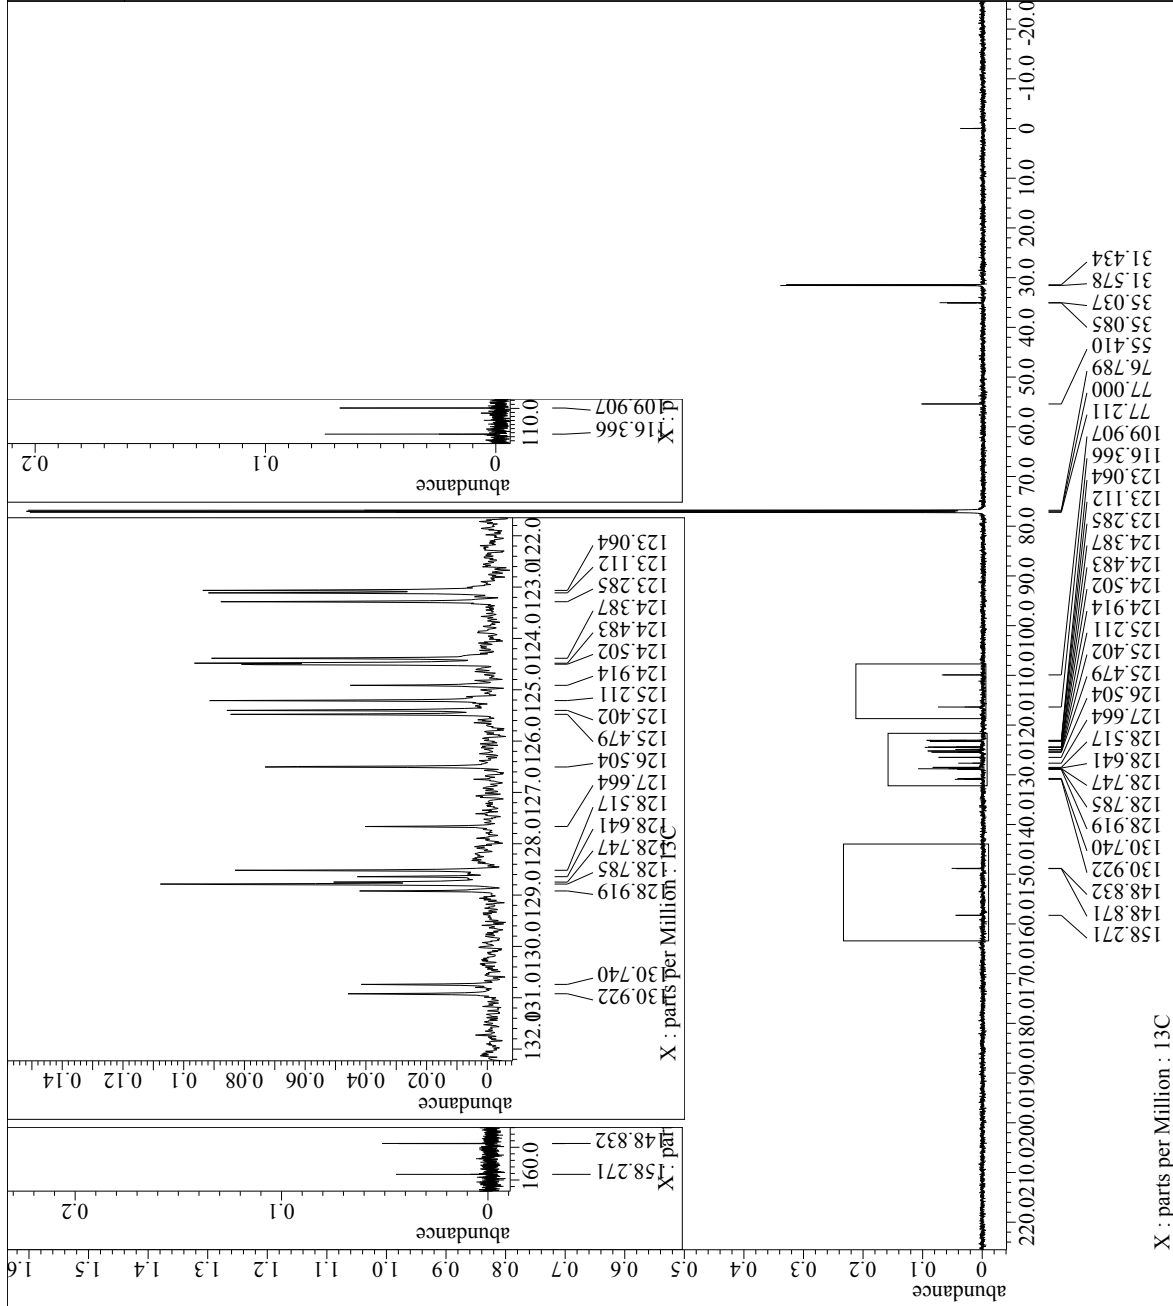

Supplementary Figure 22. <sup>13</sup>C NMR (150 MHz, CDCl<sub>3</sub>) of 3ah

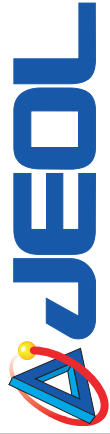

```

/Users/kyoheiozaki/Desktop
= itami
Experiment = single_pulse.ex2
Sample Id = S#29370
Solvent = CHLOROFORM-D
Creation Time = 1-MAY-2014 00:40:02
Revision Time = 1-OCT-2014 00:12:13
Current Time = 1-OCT-2014 00:12:33

Comment = single_pulse
Data Format = ID COMPLEX
Dim Size = 26214
Dim Title = 1H
Dim Units = [ppm]
Dimensions = X
Spectrometer = JNM-ECA600

Field Strength = 14.08462569[T] (600[MHz])
X_Acq Duration = 2.9097984[s]
X_Domain = 1H
X_Freq = 599.67230511[MHz]
X_Offset = 5[ppm]
X_Points = 32768
X_Prescans = 1
X_Resolution = 0.34366642[Hz]
X_Sweep = 11.26126126[MHz]
Irr_Domain = 1H
Irr_Freq = 599.67230511[MHz]
Irr_Offset = 5[ppm]
Tri_Domain = 1H
Tri_Freq = 599.67230511[MHz]
Tri_Offset = 5[ppm]
C13_Offset = FALSE
Mod Return = 1
Scans = 16
Total_Scans = 16

X_90 Width = 13.8[us]
X_Acq Time = 2.9097984[s]
X_Angle = 45[deg]
X_Atn = 3.3[dB]
X_Pulse = 6.9[us]
Irr_Mode = Off
Tri_Mode = Off
Dante Preset = FALSE
Initial Wait = 1[s]
Recvr Gain = 38
Relaxation_Delay = 5[s]
Repetition_Time = 7.9097984[s]
Temp_Get = 23.6[degC]
  
```

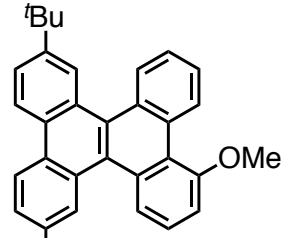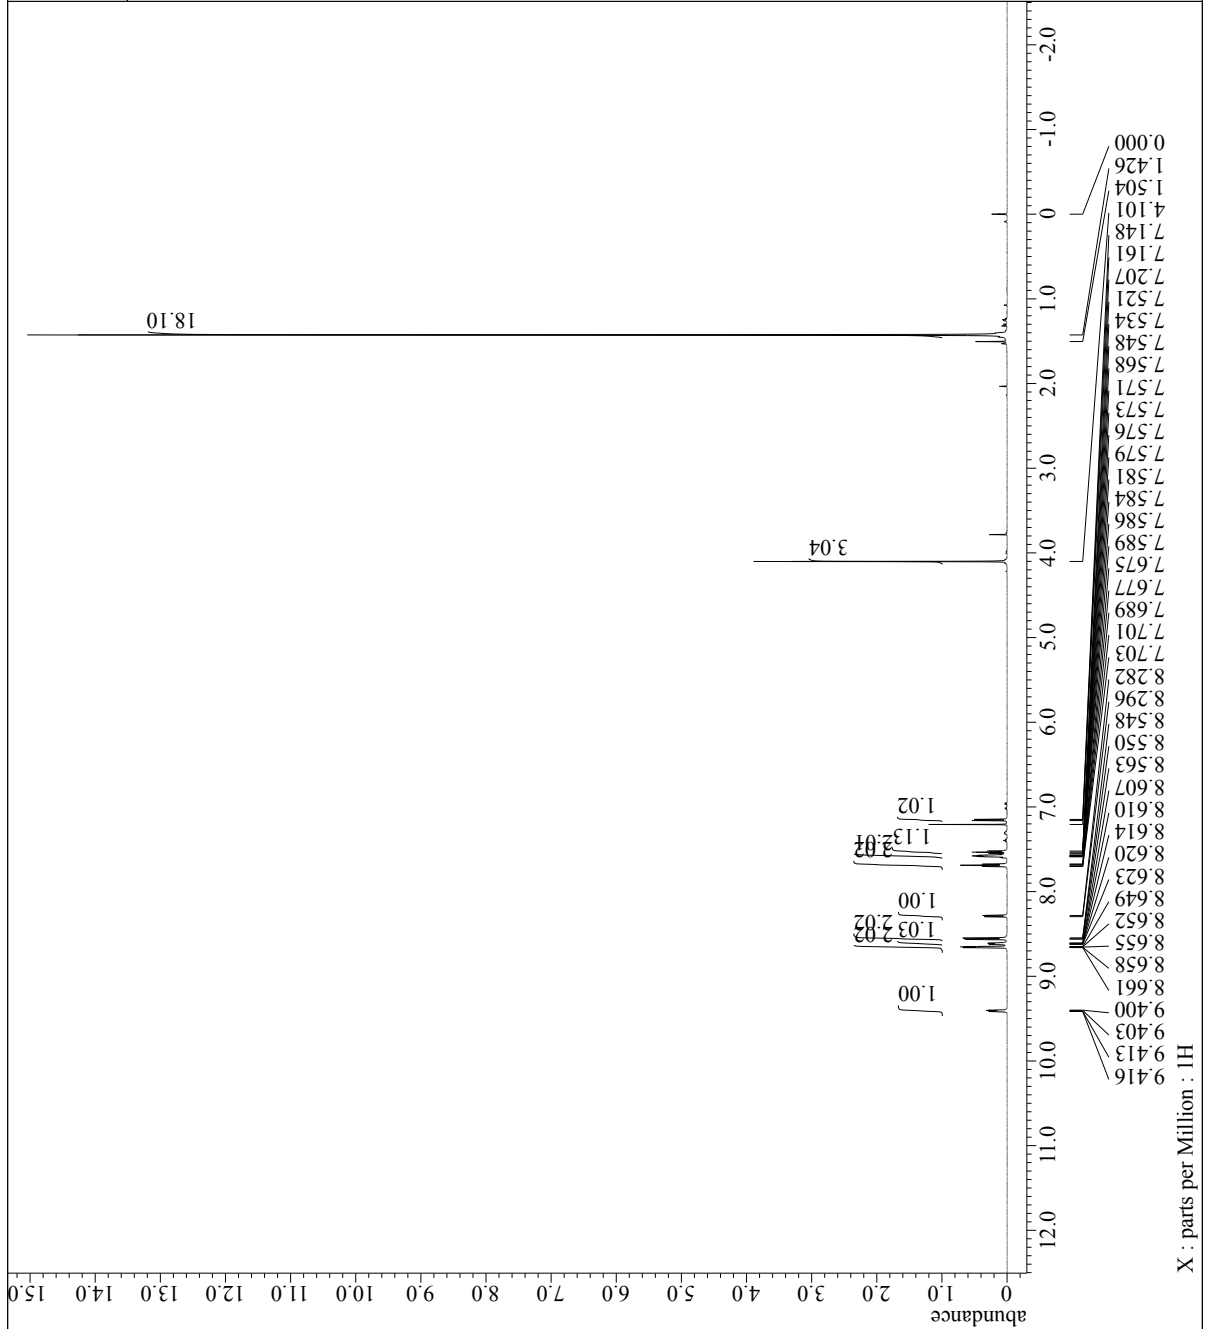

Supplementary Figure 23. <sup>1</sup>H NMR (600 MHz, CDCl<sub>3</sub>) of 3ai

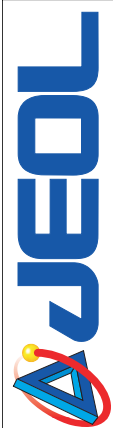

```

= /Users/kyoheiozaki/Desktop
= itami
Experiment = single_pulse_dec
Sample_id = 1
Solvent = CHLOROFORM-D
Creation_Time = 09:32:16
Accession_Time = 20-NOV-2014 01:36:02
Current_Time = 20-NOV-2014 01:36:42
Comment = single pulse decoupled gat
Data Format = 1D COMPLEX
Dim Size = 26214
Dim Title = 13C
Dim Units = [ppm]
Dimensions = X
Site = ECA600
Spectrometer = JNM-ECA600
Field_Strength = 14.08462569[T] (600 [MHz])
Acq_Duration = 0.69206016[s]
Decoupling = 130
X_Freq = 150.78770543 [MHz]
X_Offset = 100 [ppm]
X_Points = 32768
X_Prescans = 4
X_Resolution = 1.44496109 [Hz]
X_Sweep = 47.34848485 [kHz]
Irr_Domain = 1H
Irr_Freq = 599.67230511 [MHz]
Irr_Offset = 5 [ppm]
Clipped = FALSE
Mod Return = 1
Scans = 10766
Total_Scans = 10766
X 90_Width = 11.6 [us]
X Acq_Time = 0.69206016 [s]
X Angle = 30 [deg]
X Atn = 7.8 [dB]
X Pulse = 3.86666667 [us]
Irr Atn_Dec = 18.119 [dB]
Irr Atn_Noise = 18.119 [dB]
Decoupling = WALTZ
Initial_Wait = 1 [s]
Noe Time = TRUE
Relaxation_Delay = 2 [s]
Repetition_Time = 2.69206016 [s]
Temp_Get = 24.6 [dC]
  
```

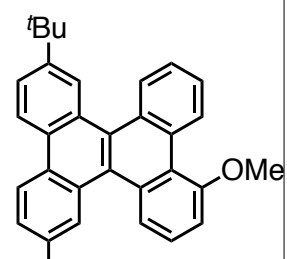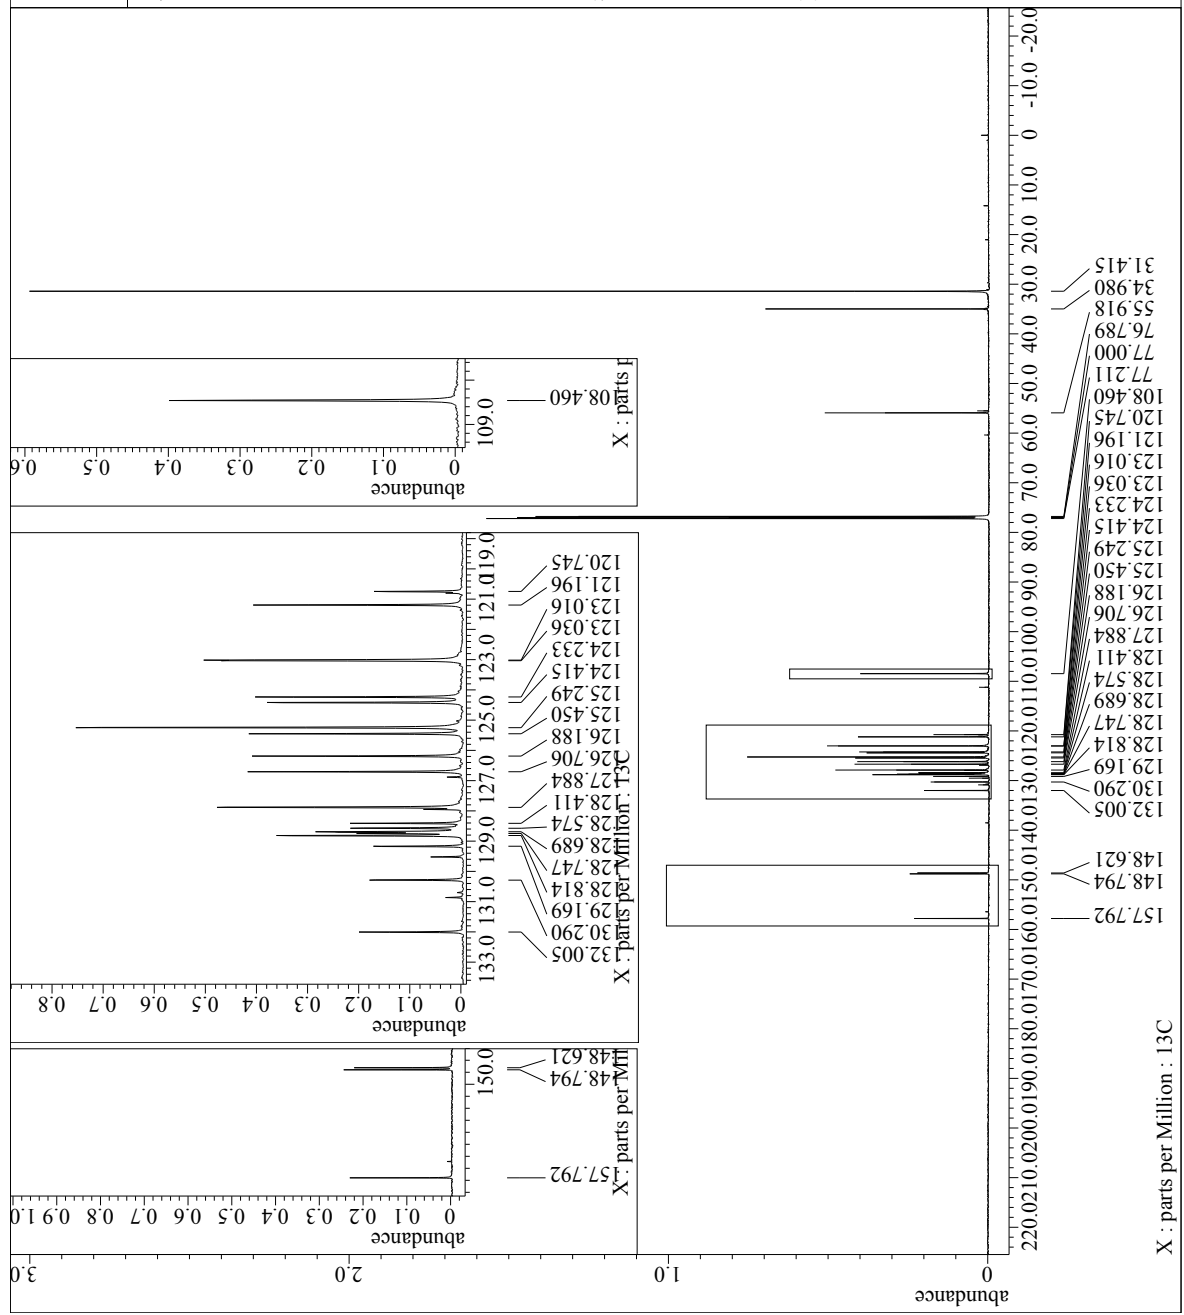

Supplementary Figure 24. <sup>13</sup>C NMR (150 MHz, CDCl<sub>3</sub>) of 3ai





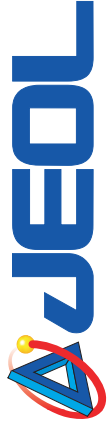

```

/Users/kyoheiozaki/desktop
= itami
Experiment = single_pulse_dec
Sample_Id = S#6216
Solvent = CDCl3
Revision_Time = 18-DEC-2012 01:57:45
Current_Time = 18-NOV-2014 22:19:09
Comment = single pulse decoupled gat
Data Format = ID COMPLEX
Dim Size = 26214
Dim Title = 13C
Dimensions = X
Site = ECA600
Spectrometer = JNM-ECA600
Field_Strength = 14.08462569 [T] (600 [MHz])
X_Acq_Duration = 0.69206016 [s]
X_Freq = 150.78770543 [MHz]
X_Offset = 100 [ppm]
X_Points = 32768
X_Prescans = 4
X_Resolution = 1.44496109 [Hz]
X_Sweep = 47.34848485 [kHz]
Irr_Domain = 1H
Irr_Freq = 599.67230511 [MHz]
Irr_Offset = 5 [ppm]
Clipped = FALSE
Mod_Return = 1
Scans = 512
Total_Scans = 512
X_90_Width = 11.2 [us]
X_Acq_Time = 0.69206016 [s]
X_Angle = 30 [deg]
X_Atn = 7.8 [dB]
X_Pulse = 3.73333333 [us]
Irr_Atn_Dec = 17.871 [dB]
Irr_Atn_Noise = 17.871 [dB]
Decoupling = WALTZ
Initial_Wait = 1 [s]
Noe_Time = TRUE
Noe_Gain = 2 [s]
Recvr_Gain = 60
Relaxation_Delay = 2 [s]
Repetition_Time = 0.69206016 [s]
Temp_Get = 23.5 [cC]
  
```

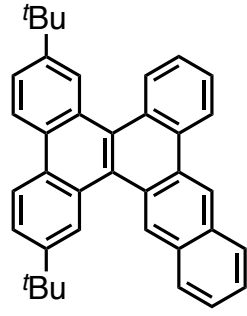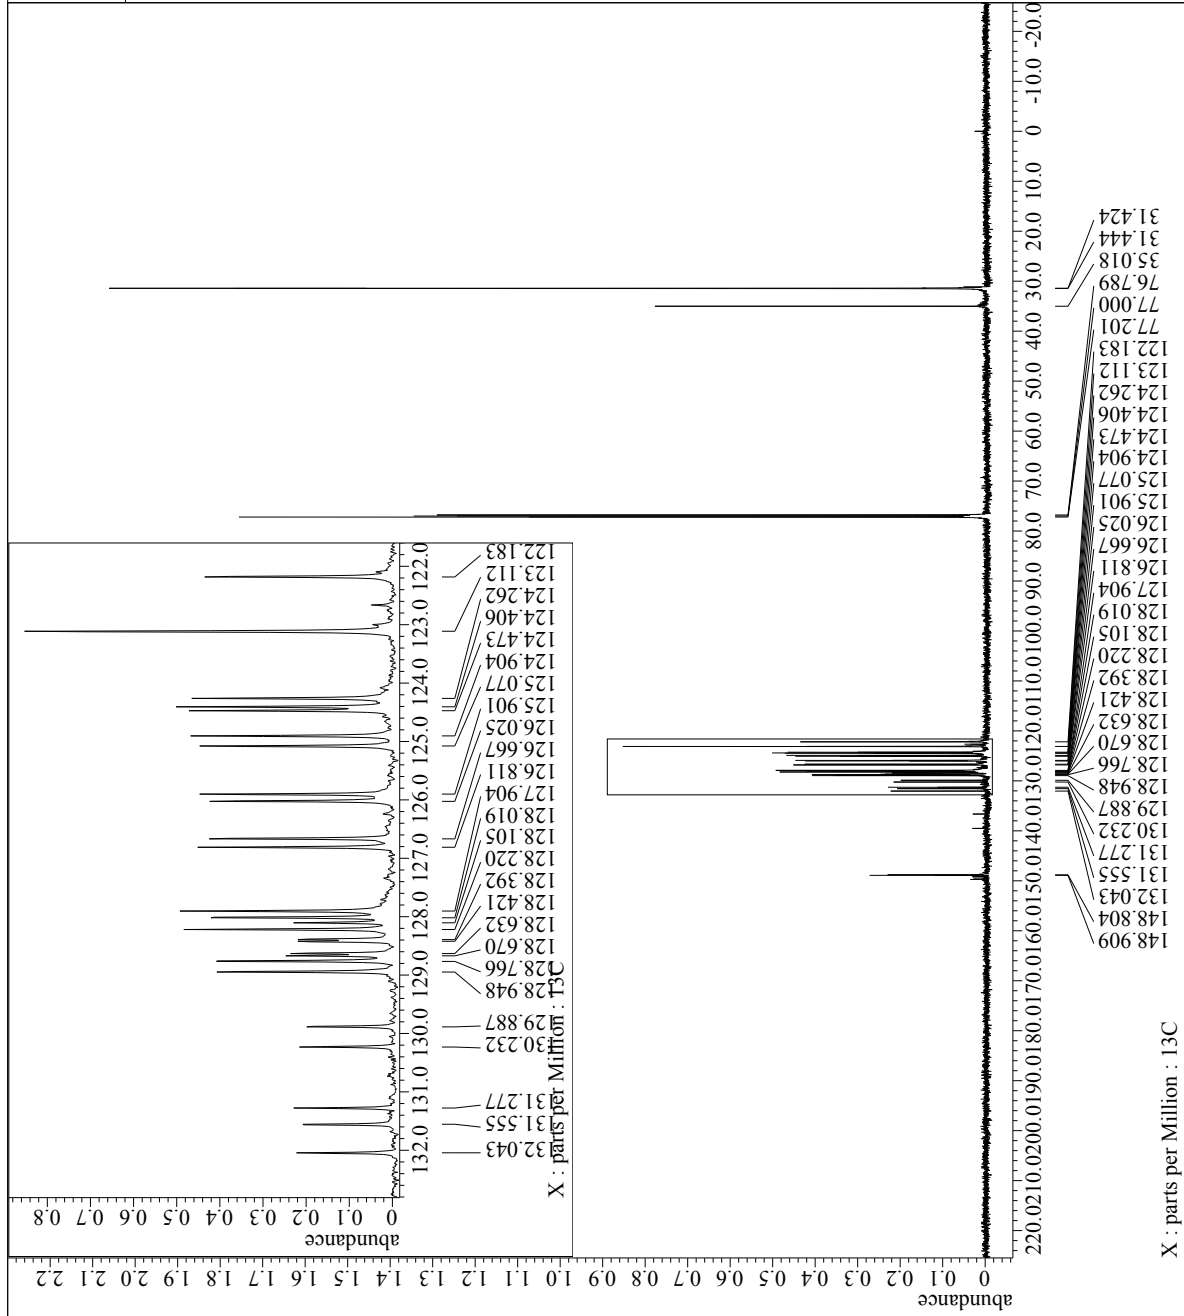

Supplementary Figure 26. <sup>13</sup>C NMR (150 MHz, CDCl<sub>3</sub>) of 3a<sub>j</sub>

```

/Users/kycheiozaki/Desktop
=
delta
Experiment
Sample Id S#83777
Solvent CHLOROFORM-D
Creation Time 26-MAY-2014 23:06:30
Revision Time 1-OCT-2014 00:51:51
Current Time 1-OCT-2014 00:52:01

=
single_pulse
ID COMPLEX
26214
IR
[ppm]
X
ECA 600
Spectrometer DELTA2_NMR

Field Strength = 13.9540559[T] (590[MHz])
X Acq Duration = 2.94125568[s]
X Domain = 1H
X Freq = 594.17058168[MHz]
X Offset = 5[ppm]
X Points = 32768
X Prescans = 1
X Resolution = 0.3399084[Hz]
X Sweep = 11.14081996[KHz]
IRF Domain = 1H
IRF Freq = 594.17058168[MHz]
IRF Offset = 1[ppm]
IRF Domain = 1H
IRF Freq = 594.17058168[MHz]
IRF Offset = 5[ppm]
Clipped = FALSE
Mod Return = 1
Total Scans = 8

X 90 Width = 10.6[us]
X Acq Time = 2.94125568[s]
X Angle = 45[deg]
X Atn = 4.9[dB]
X Pulse = 5.3[us]
IRF Mode = Off
IRF Mode = Off
Dante_Preset = FALSE
Initial Wait = 1[s]
Recvr_Gain = 54
Relaxation Delay = 7[s]
Repetition Time = 7.94125568[s]
Temp_Get = 22.2[degC]

```

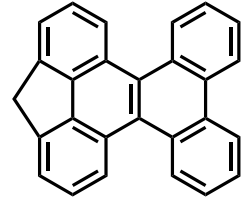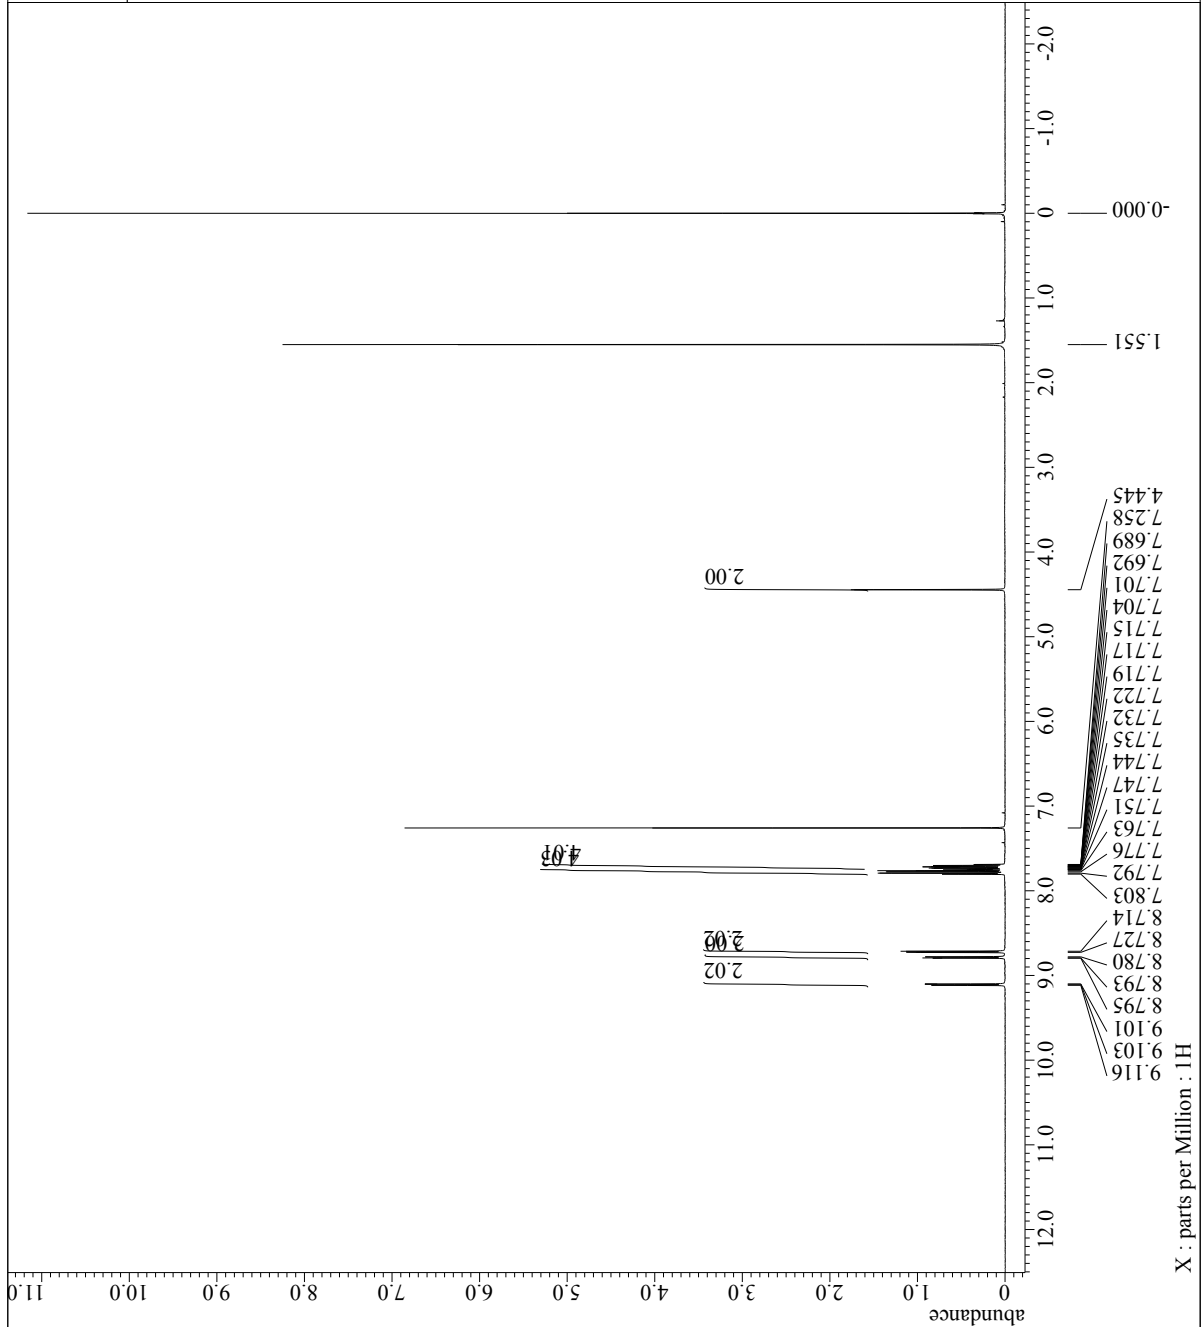

Supplementary Figure 27. <sup>1</sup>H NMR (600 MHz, CDCl<sub>3</sub>) of 3ca

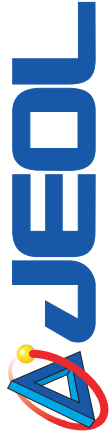

```

File Name      = /Users/kycheiozaki/Desktop
Author        = delta
Experiment    = carbon_jkp
Sample Id     = oz2-242_PTLIC-for-data
Solvent       = CHLOROFORM-D
Creation Time = 24-MAY-2014 00:40:54
Revision Time = 24-MAY-2014 00:52:05
Current Time  = 20-NOV-2014 01:41:55

Comment       = single pulse decoupled gat
Data Format    = 1D COMPLEX
Dim Size      = 26214
Dim Title     = Carbon13
Dim Units     = [ppm]
Dimensions    = X
Site          = JNM-ECA600II
Spectrometer  = DELTA2_NMR

Field Strength = 14.09636928[T] (600 [MHz])
X_Acq_Duration = 0.69206016[s]
X_Domain       = 13C
X_Freq         = 150.91343039 [MHz]
X_Offset       = 100 [ppm]
X_Points       = 32768
X_Prescans     = 4
X_Resolution   = 1.44496109 [Hz]
X_Sweep        = 47.34848485 [kHz]
X_Sweep Clipped = 37.87878788 [kHz]
Irr Domain     = Proton
Irr Freq       = 600.1723046 [MHz]
Irr_Offset     = 5 [ppm]
Clipped        = FALSE
Mod Return     = 1
Probe Recovery = 75.0 [us]
Scans          = 45
Total_Scans    = 45

X_90_Width     = 8.5 [us]
X_Acq_Time     = 0.69206016 [s]
X_Angle        = 30 [deg]
X_Pul_Program  = zgpg30
X_P1           = 2.83333333 [us]
X_P2           = 18.4 [dB]
X_P3           = 18.4 [dB]
X_P4           = 73 [us]
X_P5           = TRUE
X_P6           = TRUE
X_P7           = 2 [s]
X_P8           = 60
X_P9           = 2 [s]
X_P10          = 2 [s]
Relaxation Delay = 2 [s]
Repetition_Time = 2.69206016 [s]
Temp_Get       = 24.3 [dC]
  
```

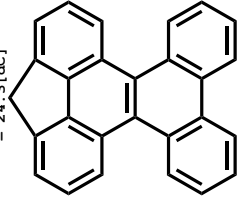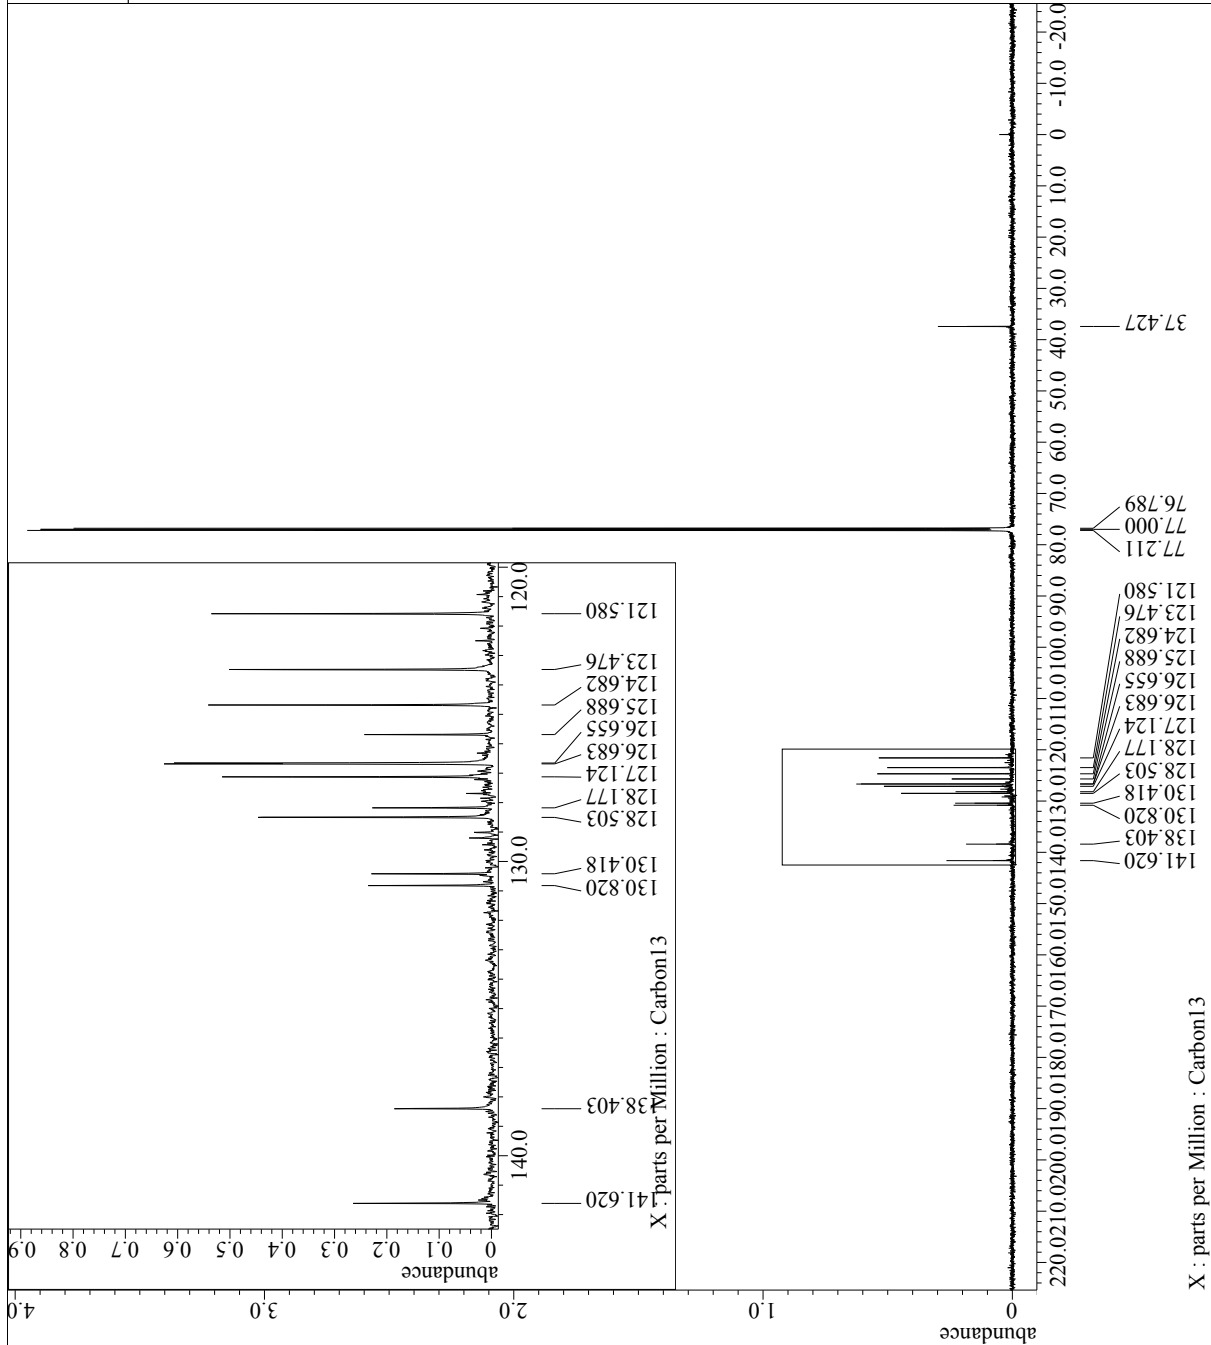

Supplementary Figure 28. <sup>13</sup>C NMR (150 MHz, CDCl<sub>3</sub>) of 3ca

```

/Users/kychoizaki/Desktop
= itami
= single_pulse.ex2
= S#737468
= CHLOROFORM-D
= 17-DEC-2012 20:17:08
= 1-OCT-2014 01:15:52
= 1-OCT-2014 01:15:58
= single_pulse
= ID COMPLEX
= 26214
= 1H
= [ppm]
= X
= ECA600
= JNM-ECA600
= 14.08462569[T] (600 [MHz])
= 2.9097984[s]
= 1H
= 599.67230511 [MHz]
= 5 [ppm]
= 32768
= 1
= 0.34366642 [Hz]
= 11.26126126 [kHz]
= 1H
= 599.67230511 [MHz]
= 5 [ppm]
= 1H
= 599.67230511 [MHz]
= 5 [ppm]
= FALSE
= 1
= 8
= 8
= 14.2 [us]
= 2.9097984 [s]
= 45 [deg]
= 3.3 [dB]
= 7.1 [us]
= Off
= Off
= FALSE
= 1 [s]
= 40
= 5 [s]
= 7.9097984 [s]
= 22.1 [dC]
  
```

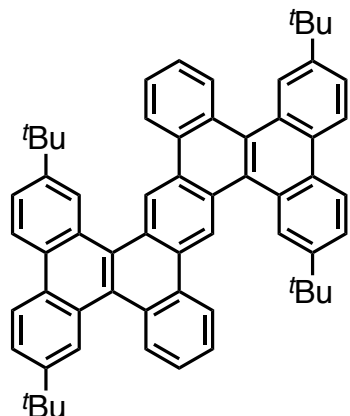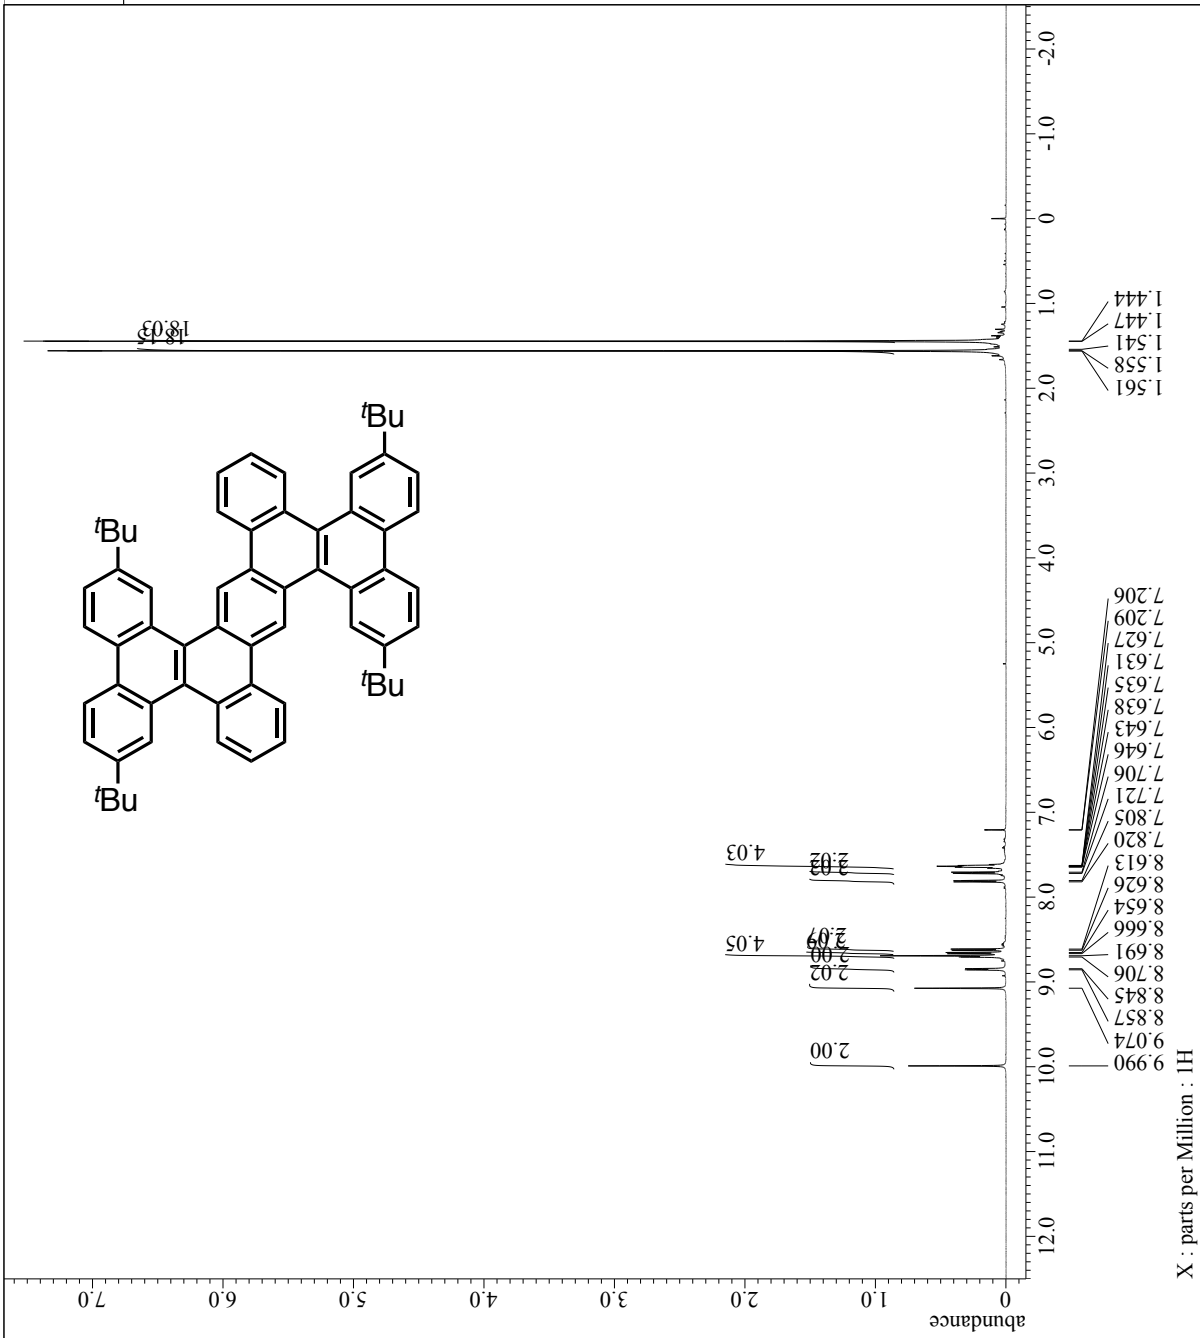

Supplementary Figure 29. <sup>1</sup>H NMR (600 MHz, CDCl<sub>3</sub>/CS<sub>2</sub>) of 5

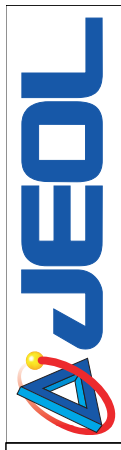

```

/Users/kyoheiozaki/desktop
= itami
= single pulse_dec
Experiment = S#739032
Sample Id = CHLOROFORM-D
Solvent = 17-DEC-2012 20:57:31
Creation Time = 18-NOV-2014 22:21:40
Revision Time = 20-NOV-2014 01:51:31
Current Time =
Comment = single pulse decoupled gat
Data Format = sD-COMP.LEX
Dir_Eigen = 26214
Dir_Title = 13C
Dim_Units = [ppm]
Dimensions = X
Site = ECA600
Spectrometer = JNM-ECA600
Field_Strength = 14.08462569 [T] (600 [MHz])
X_Acq_Duration = 0.69206016 [s]
X_Domain = 13C
X_Freq = 150.78770543 [MHz]
X_Offset = 100 [ppm]
X_Points = 32768
X_Rescans = 1
X_Resolution = 1.44496109 [Hz]
X_Spec = 47.34848485 [kHz]
Irr_Domain = 1H
Irr_Freq = 599.67230511 [MHz]
Irr_Offset = 5 [ppm]
Clipped = FALSE
Mod_Return = 1
Scans = 846
Total_Scans =
X_90_Width = 11.2 [us]
X_Acq_Time = 0.69206016 [s]
X_Angle = 30 [deg]
X_Atn = 3.75353333 [us]
X_Pulse = 17.871 [dB]
X_Pulse_Dec = 17.871 [dB]
Irr_Atn_Noise = WALTZ
Decoupling = TRUE
Initial_Wait = 1 [s]
Noe_Time = TRUE
Noe_Time = 2 [s]
Recvr_Gain = 60
Relaxation_Delay = 2 [s]
Repetition_Time = 2.69206016 [s]
Temp_Get = 23.5 [dC]
  
```

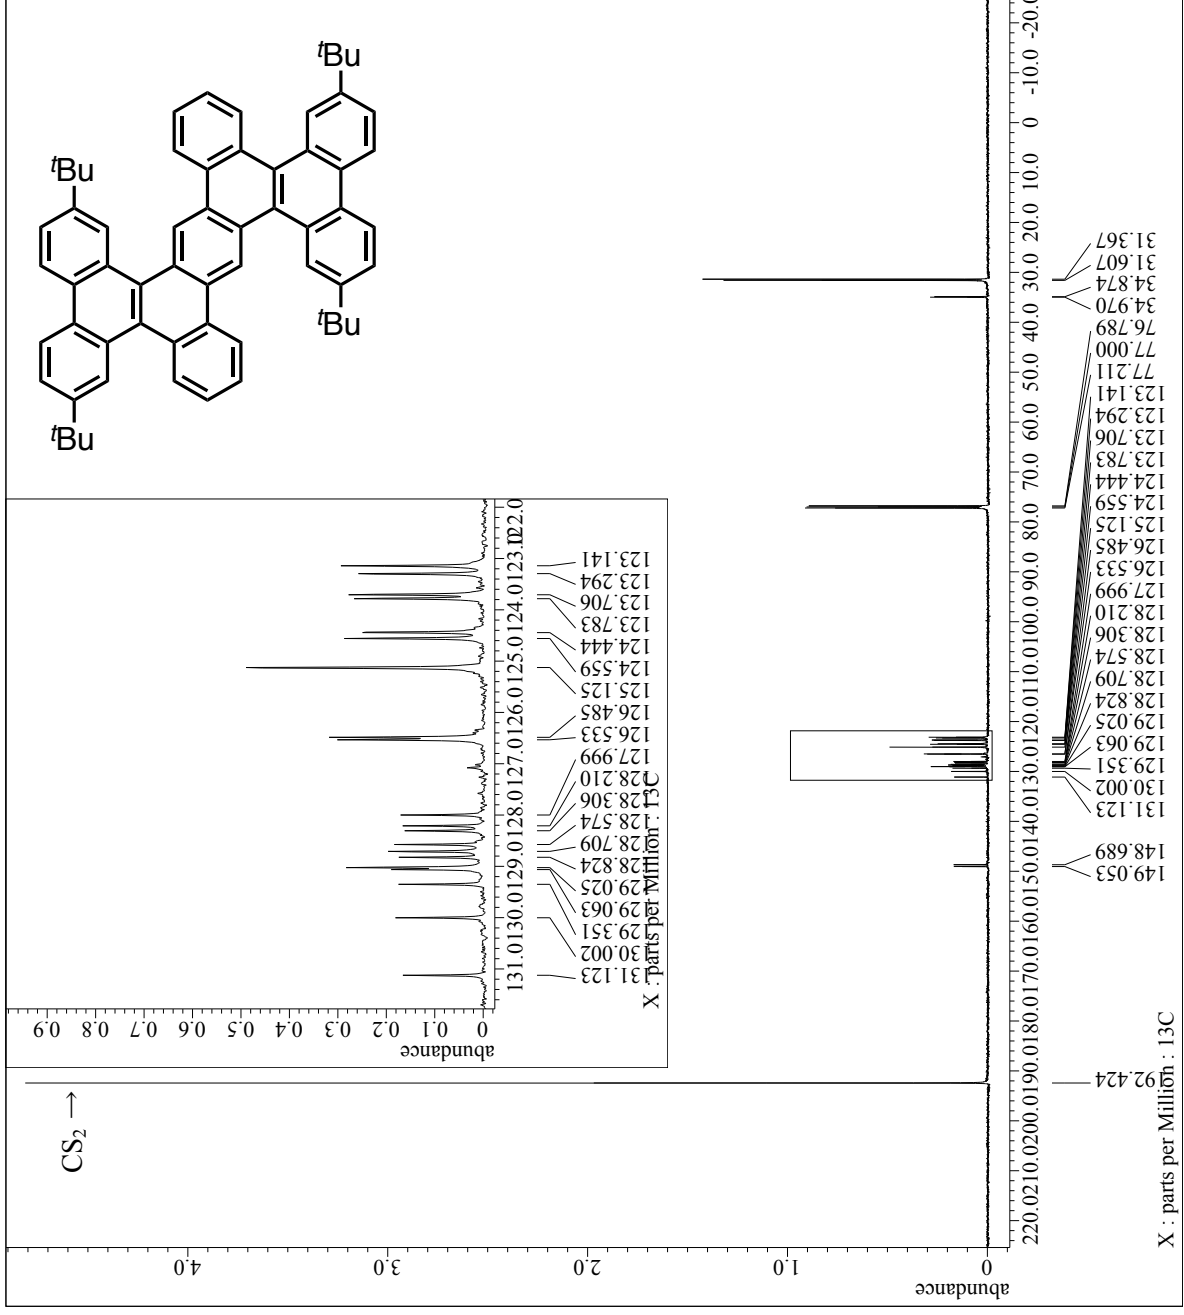

Supplementary Figure 30. <sup>13</sup>C NMR (150 MHz, CDCl<sub>3</sub>/CS<sub>2</sub>) of 5

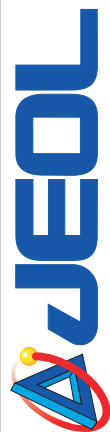

File Name = /Users/kyoheiorzaki/Desktop  
Author = itami  
Experiment = single\_pulse.ex2  
Sample Id = S#701771  
Solvent = CHLOROFORM-D  
Creation Time = 8-MAR-2011 19:30:41  
Revision Time = 13-SEP-2014 02:06:34  
Current Time = 1-OCT-2014 01:20:31  
Comment = single\_pulse  
Data Format = ID COMPLEX  
Data Size = 13107  
Dim Title = 1H  
Dim Units = [ppm]  
Dimensions = X  
Site = XCA\_600  
Spectrometer = DELTA2\_NMR  
Field Strength = 14.09636928[T] (600 [MHz])  
X\_Acq\_Duration = 1.4548992[s]  
X\_Domain = 1H  
X\_Freq = 600.1723046 [MHz]  
X\_Offset = 16384  
X\_Points = 5 [ppm]  
X\_Prescans = 1  
X\_Resolution = 0.68733284 [Hz]  
X\_Sweep = 11.26126126 [kHz]  
Irr\_Domain = 1H  
Irr\_Freq = 600.1723046 [MHz]  
Irr\_Offset = 5 [ppm]  
Tri\_Domain = 1H  
Tri\_Freq = 600.1723046 [MHz]  
Tri\_Offset = 5 [ppm]  
Clipped = FALSE  
Mod\_Return = 1  
Scans = 8  
Total\_Scans = 8  
X\_90\_Width = 14 [us]  
X\_Acq\_Time = 1.4548992 [s]  
X\_Angle = 45 [deg]  
X\_Attn = 4.1 [dB]  
X\_Pulse = 7 [us]  
Irr\_Mode = Off  
Tri\_Mode = Off  
Dante\_Preset = FALSE  
Initial\_Wait = 1 [s]  
Recvr\_Gain = 60  
Relaxation\_Delay = 5 [s]  
Repetition\_Time = 6.4548992 [s]  
Temp\_Get = 22.4 [dC]

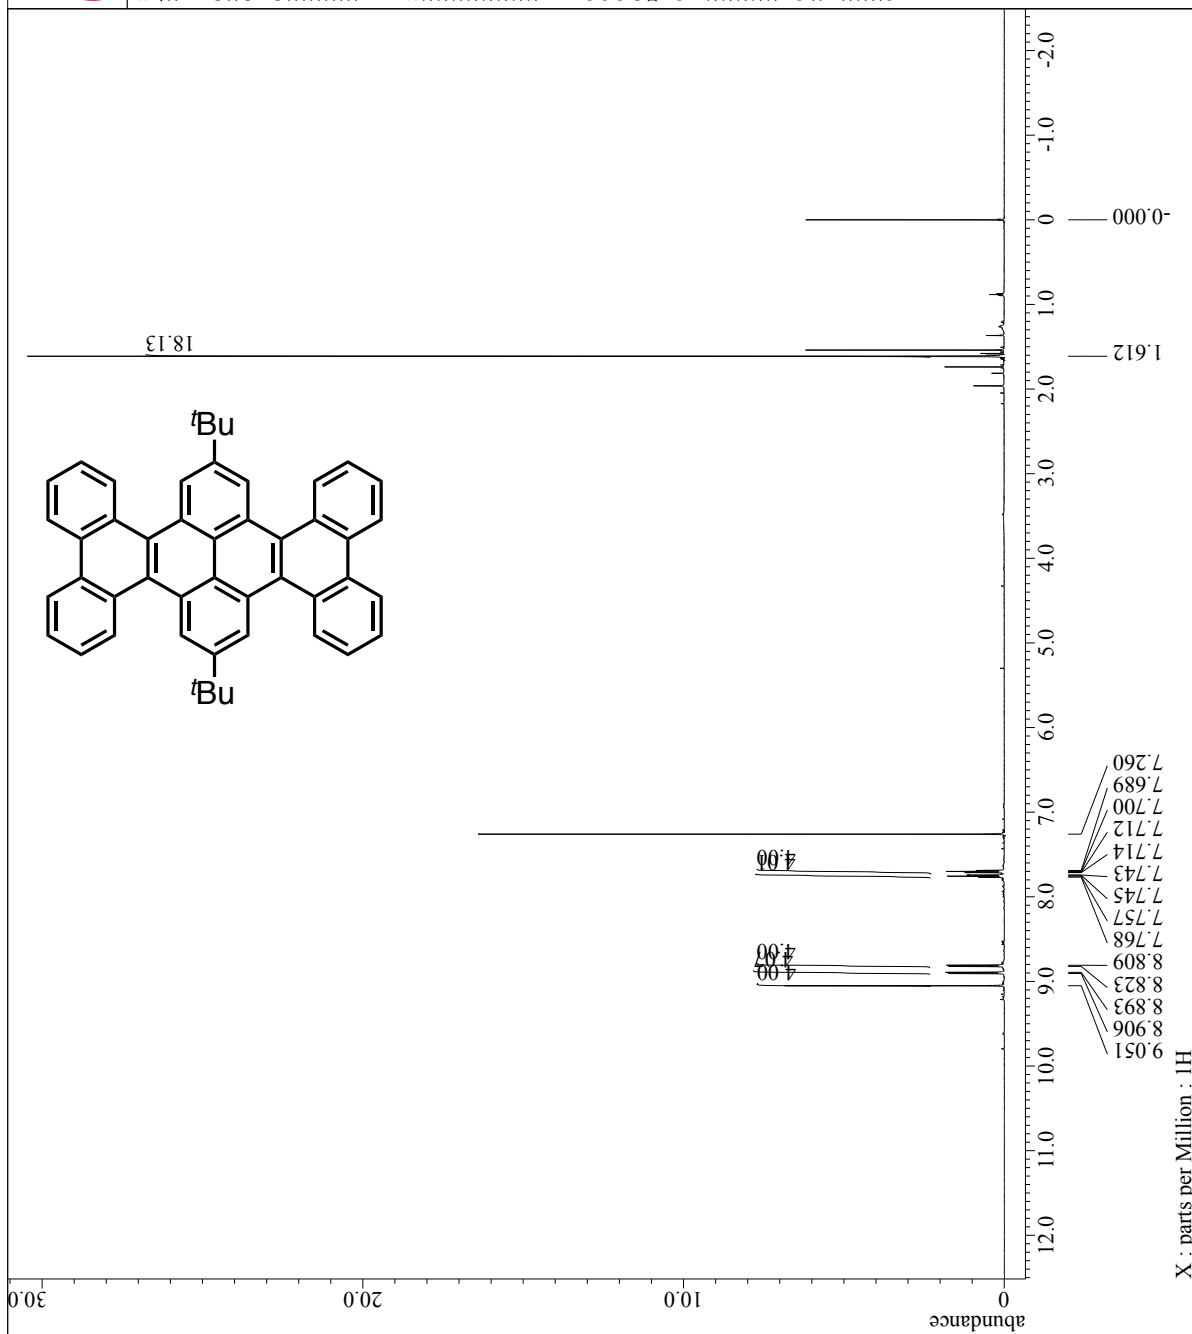

Supplementary Figure 31. <sup>1</sup>H NMR (600 MHz, CDCl<sub>3</sub>) of 7

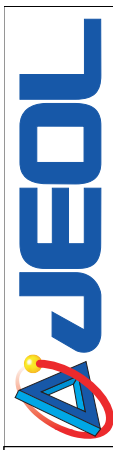

```

/Users/kyohetozaki/desktop
delta
pulse dec
13C-2011_pulse_dec
CHLOROFORM-D
9-MAR-2011 06:18:08
9-MAR-2011 08:33:44
20-NOV-2014 01:52:33
13C-single_pulse_dec
1D COMPLEX
26214
13C
X
ECS 400
JNM-ECS400
Field Strength = 9.20197068[T] (390 [MHz])
X_Acq_Duration = 1.06430464[s]
X_Domain = 13C
X_Freq = 98.51479726 [MHz]
X_Offset = 100 [ppm]
X_Points = 32768
X_Prescans = 4
X_Resolution = 0.93958061 [Hz]
X_Sweep = 30.78817734 [kHz]
Irr_Domain = 1H
Irr_Freq = 391.78655441 [MHz]
Irr_Offset = 5 [ppm]
Clipped = FALSE
Mod_Return = 1
Scans = 10000
total_scans
X_90_Width = 8.04 [us]
X_Acq_Time = 1.06430464 [s]
X_Angle = 30 [deg]
X_Atn = 4.4 [dB]
X_Pulse = 2.68 [us]
Irr_Atn_Dec = 22.489 [dB]
Irr_Atn_Noise = 22.489 [dB]
Decoupling = WALTZ
Initial_Wait = 1 [s]
Noe_Time = 1 [s]
Recvr_Gain = 60
Relaxation_Delay = 1 [s]
Repetition_Time = 2.06430464 [s]
Temp_Cst = 22.5 [dC]
  
```

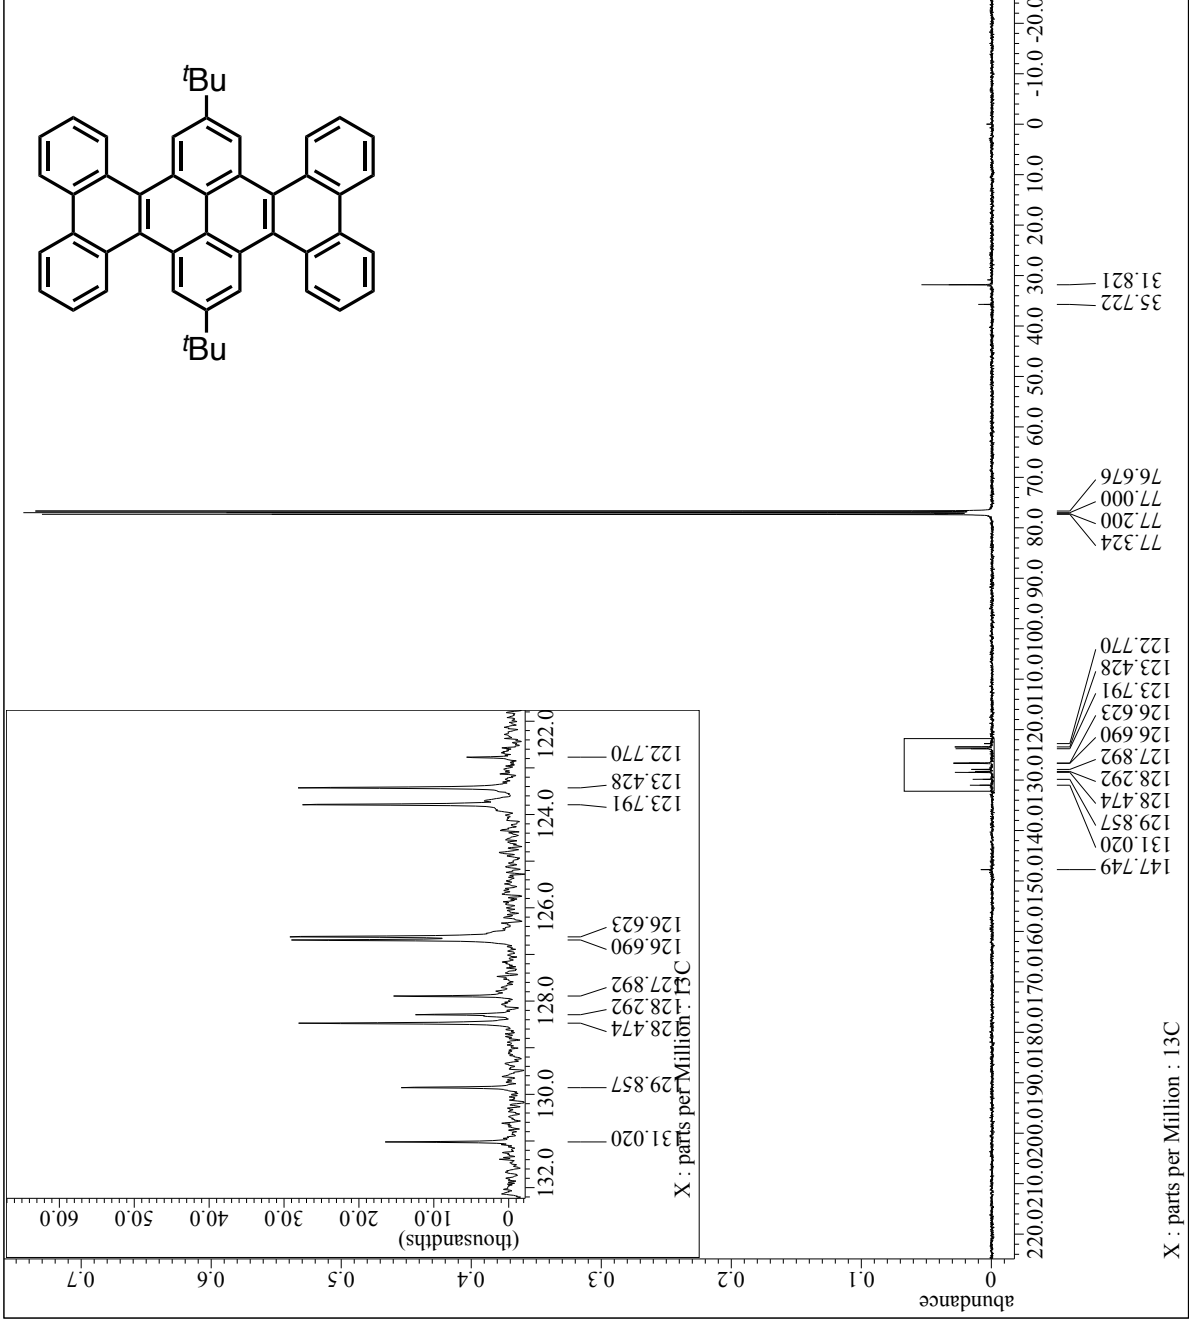

Supplementary Figure 32. <sup>13</sup>C NMR (150 MHz, CDCl<sub>3</sub>) of 7



```

/Users/kychoizaki/Desktop
= itami
Author = single_pulse.ex2
Experiment = S#623080
Sample Id = CHLORFORM-D
Solvent = 29-APR-2014 17:09:06
Creation Time = 1-OCT-2014 01:23:01
Revision Time = 1-OCT-2014 01:23:05
Current Time

Comment = single_pulse
Data Format = 1D COMPLEX
Dim Size = 26214
Dim Title = 1H
Dim Units = [ppm]
Dimensions = X
Site = RCS600
Spectrometer = JNM-ECA600

Field Strength = 14.08462569[T] (600 [MHz])
X_Acq_Duration = 2.9097984 [s]
X_Domain = 1H
X_Freq = 599.67230511 [MHz]
X_Offset = 5 [ppm]
X_Points = 32768
X_Prescans = 1
X_Resolution = 0.34366642 [Hz]
X_Sweep = 11.26126126 [kHz]
Irr_Domain = 1H
Irr_Freq = 599.67230511 [MHz]
Irr_Offset = 5 [ppm]
Tri_Domain = 1H
Tri_Freq = 599.67230511 [MHz]
Tri_Offset = 5 [ppm]
Mipped = FALSE
Mode_Return = 1
Scans = 8
Total_Scans = 8

X_90_Width = 13.8 [us]
X_Acq_Time = 2.9097984 [s]
X_Angle = 45 [deg]
X_Atn = 3.3 [dB]
X_Pulse = 6.9 [us]
Irr_Mode = Off
Tri_Mode = Off
Dante_Preset = FALSE
Initial_Wait = 1 [s]
Recvr_Gain = 48
Relaxation_Delay = 5 [s]
Repetition_Time = 7.9097984 [s]
Temp_Get = 23.7 [dC]
  
```

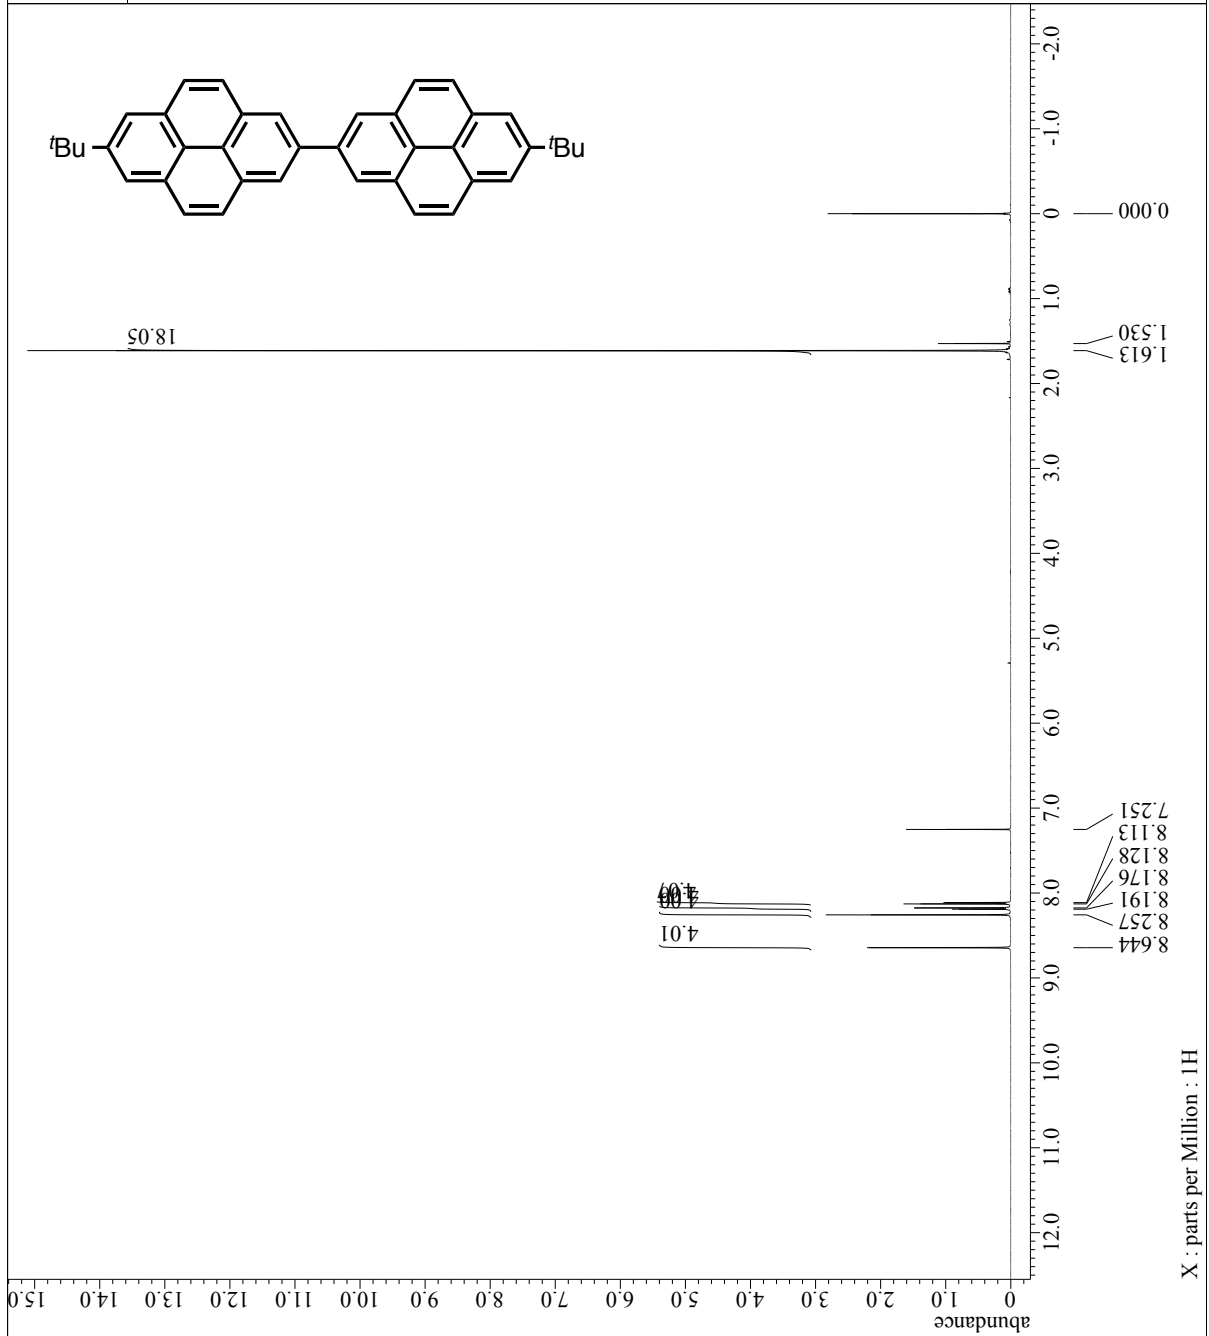

Supplementary Figure 33. <sup>1</sup>H NMR (600 MHz, CDCl<sub>3</sub>) of 8

```

/Users/kycheiozaki/Desktop
=
start_pulse_dec
= S#45375
= CHLOROFORM-D
Creation_Time = 29-APR-2014 18:31:45
Revision_Time = 20-NOV-2014 01:55:10
Current_Time = 20-NOV-2014 01:55:21
=
Comment = single pulse decoupled gat
Data_Format = 1D COMPLEX
Dim_Size = 26214
Dim_Title = 13C
Dim_Units = [ppm]
Dimensions = X
Site = ECA600
Spectrometer = JNM-ECA600
Field_Strength = 14.08462569[T] (600 [MHz])
X_Acq_Duration = 0.69206016[s]
X_Domain = 13C
X_Freq = 120.78770543 [MHz]
X_Offset = 100 [ppm]
X_Points = 32766
X_Prescans = 4
X_Resolution = 1.44496109 [Hz]
X_Sweep = 47.34848485 [kHz]
Irr_Domain = 1H
Irr_Freq = 599.67230511 [MHz]
Irr_Offset = 5 [ppm]
Clipped = FALSE
Mod_Return = 1
Scans = 1020
Total_Scans = 1020
X_90_Width = 11.6[us]
X_Acq_Time = 0.69206016[s]
X_Angle = 30[deg]
X_Atn = 7.8 [dB]
X_Pulse = 3.8666667[us]
Irr_Atn_Dec = 18.119 [dB]
Irr_Atn_Noise = 18.119 [dB]
Irr_Noise = 18.119 [dB]
Decoupling = WALTZ
Acquire = TRUE
Initial_Wait = 1[s]
Nuc1 = 13C
Nuc2 = TRUE
Nuc3 = TRUE
Nuc4 = 2[s]
Recvr_Gain = 60
Relaxation_Delay = 2[s]
Repetition_Time = 2.69206016[s]
Temp_Get = 24.5[dC]

```

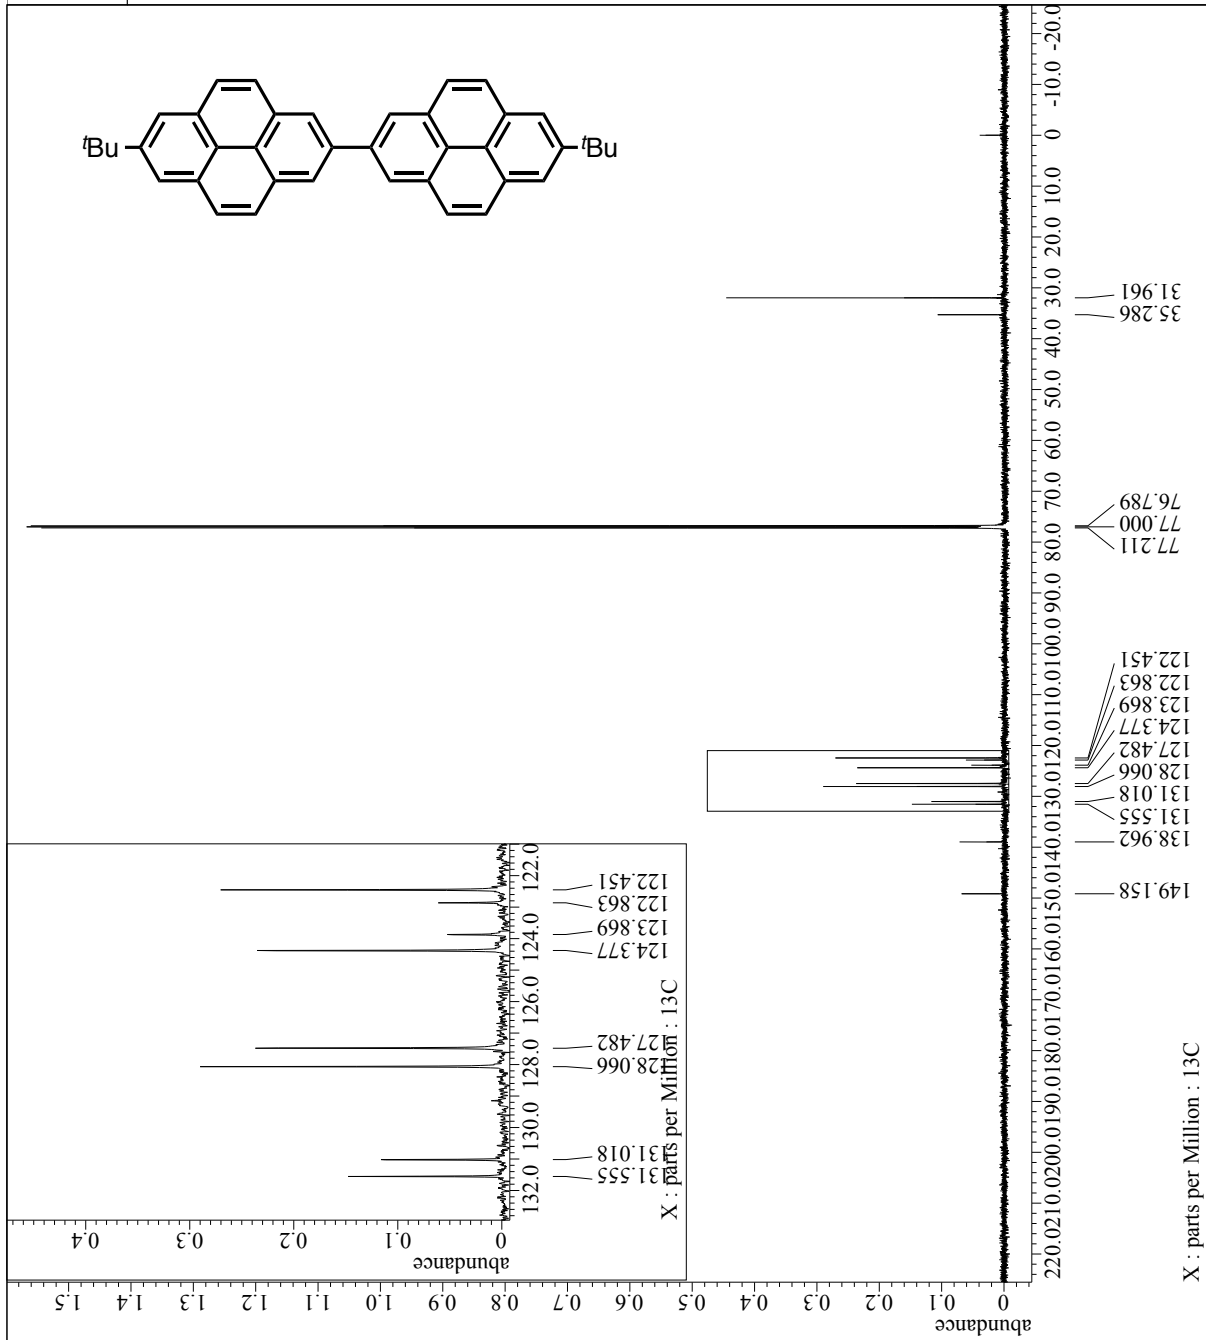

Supplementary Figure 34. <sup>13</sup>C NMR (150 MHz, CDCl<sub>3</sub>) of 8

```

/Users/kyohei/ozaki/Desktop
=
delta
=
proton .f3p
=
oz2-405-GPC
=
CHLOROFORM-D
=
24-MAY-2014 00:16:46
=
Revision_Time = 1-OCT-2014 00:30:43
=
Current_Time = 1-OCT-2014 01:25:30
=
single_pulse
=
ID COMPLEX
=
F3107
=
Proton
=
X
=
JNM-PCA600II
=
DELTA2_NMR
=
Spectrometer
=
Field Strength = 14.09636928[T] ( 600 [MHz])
X Acq_Duration = 1.4548992[s]
X Domain = 1H
X Freq = 600.1723046[MHz]
X Points = 5[ppm]
X Prescans = 16384
X Points = 1
X Resolution = 0.68733284 [Hz]
X Sweep = 11.26126126 [kHz]
X Domain = 9.00900901 [kHz]
=
Proton
=
600.1723046[MHz]
=
5[ppm]
=
Proton
=
600.1723046[MHz]
=
5[ppm]
=
Proton
=
600.1723046[MHz]
=
5[ppm]
=
FALSE
=
1
=
Mod Return
=
Probe Recovery = 50 [us]
Scans = 8
Total_Scans = 8
=
X 90_Width = 9.8[us]
X Acq_Time = 1.4548992[s]
X Angle = 45[deg]
X Atn = 1[dB]
X Pulse = 4.9[us]
X Mode = Off
=
Dante_Preset = FALSE
Initial_Wait = 1[s]
Recvr_Gain = 50
Relaxation_Delay = 2[s]
Repetition_Time = 2.4548992[s]
Temp_Get = 24.3[degC]

```

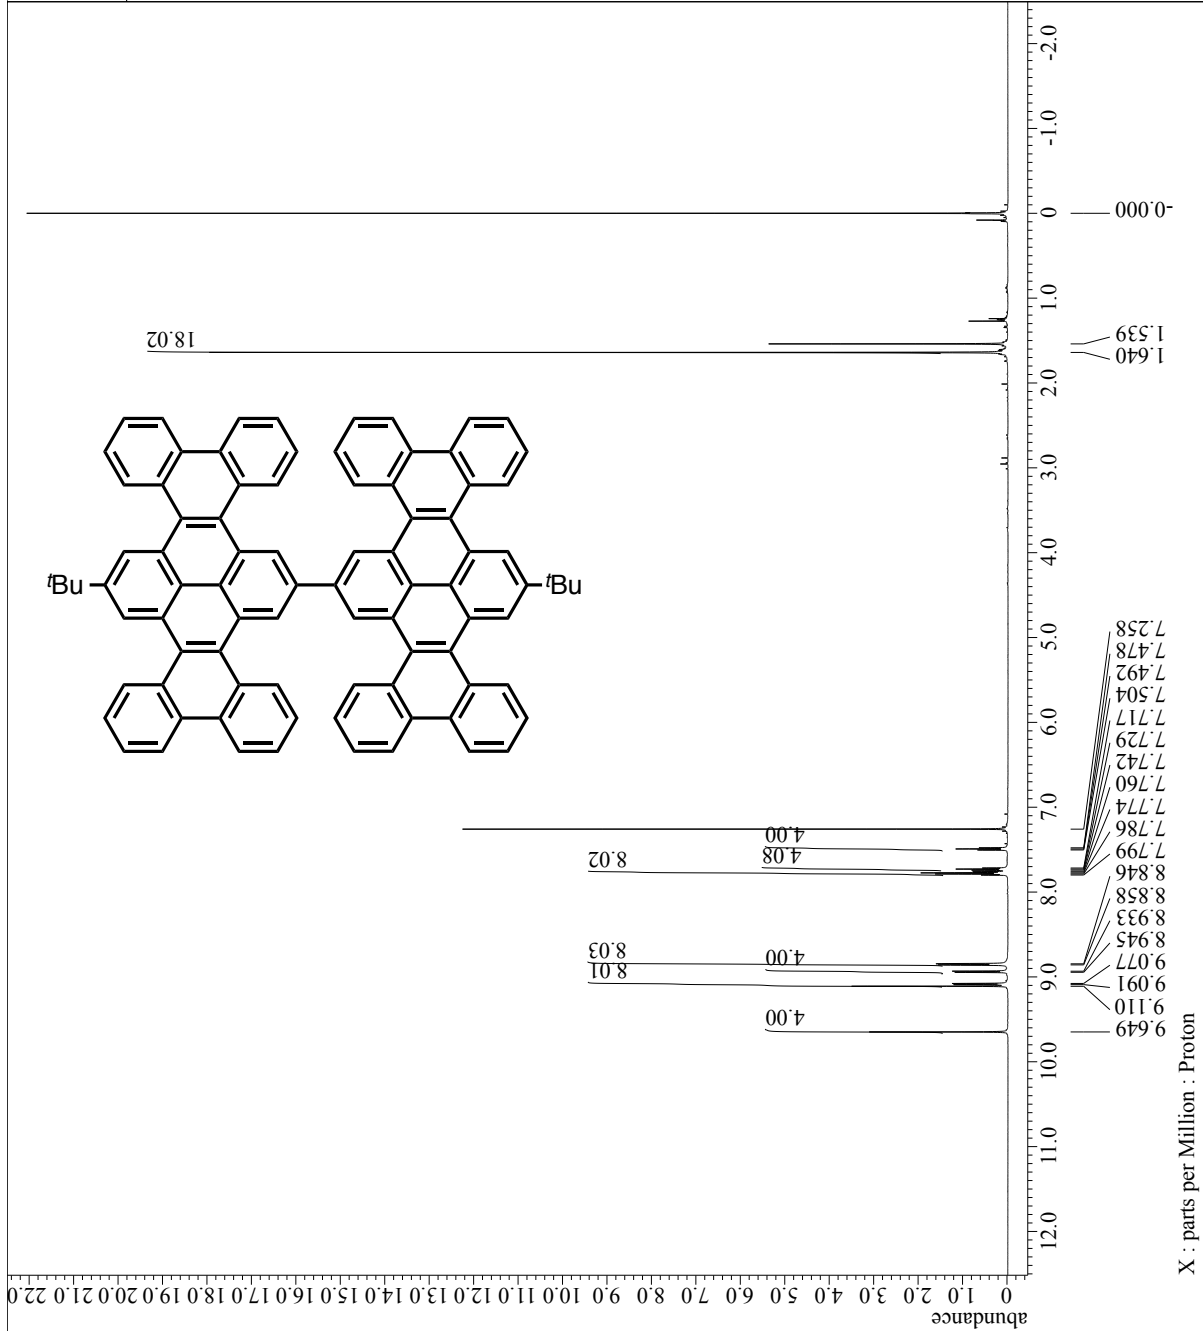

Supplementary Figure 35.  $^1\text{H}$  NMR (600 MHz,  $\text{CDCl}_3$ ) of 9

```

/Users/kyoheiozaki/Desktop
data
Experiment
  single_pulse_dec
Sample Id
  CHLOROFORM-D
Creation Time
  22-MAR-2014 09:26:00
Revision Time
  20-NOV-2014 01:56:26
Current Time
  20-NOV-2014 01:56:31
Comment
  13c-single_pulse_dec
Data Format
  1D COMPLEX
Dim Size
  52428
Dim Title
  13C
Dim Units
  [ppm]
Dimensions
  X
Site
  ECA 600
Spectrometer
  DELTAZ_NMR
Field Strength
  13.95540559 [T] (590 [MHz])
X Acq_Duration
  1.39460608 [s]
X Domain
  13C
X Freq
  149.40429612 [MHz]
X Offset
  100 [ppm]
X Points
  65536
X Prescans
  4
X Resolution
  0.71704836 [Hz]
X Sweep
  46.9924812 [kHz]
Irr Domain
  1H
Irr Freq
  594.17058168 [MHz]
Irr_Offset
  5 [ppm]
Clipped
  TRUE
Mod Return
  1
Scans
  45146
Total_Scans
  45146
X 90_Width
  8.6 [us]
X Acq_Time
  1.39460608 [s]
X Angle
  30 [deg]
X Atn
  6.9 [dB]
X Pulse
  2.86666667 [us]
Irr Atn_Dec
  22.01015 [dB]
Irr Atn_Noise
  22.01015 [dB]
Decoupling
  WALTZ
Initial_Wait
  1 [s]
Noe_Time
  TRUE
Recvr_Gain
  56
Relaxation_Delay
  1 [s]
Repetition_Time
  2.19460608 [s]
Temp_Get
  21.5 [dC]
  
```

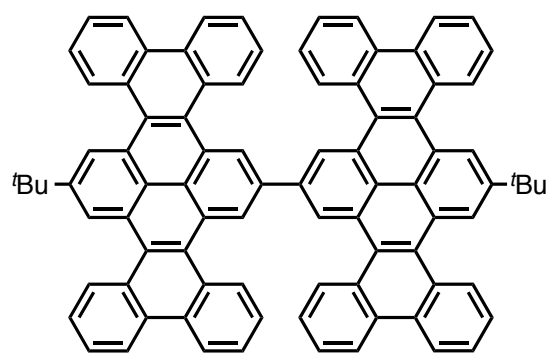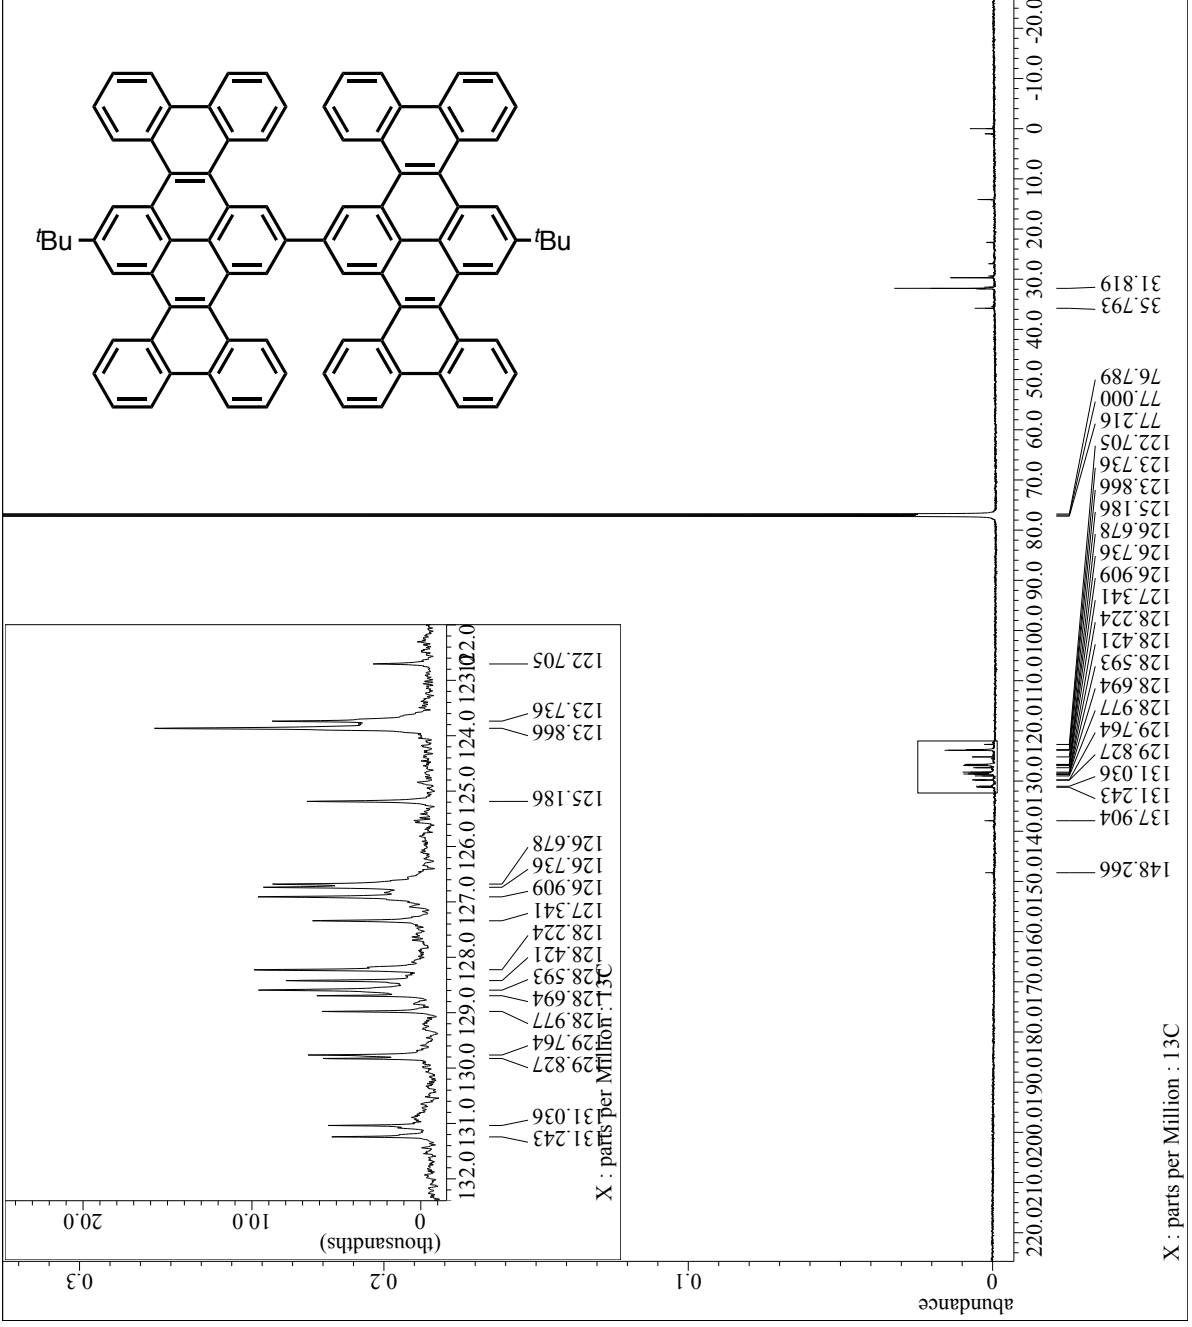

Supplementary Figure 36. <sup>13</sup>C NMR (150 MHz, CDCl<sub>3</sub>) of 9

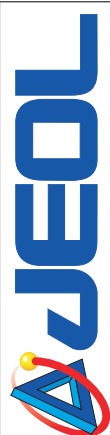

File Name = /Users/kycheiozaki/Desktop  
Author = delta  
Experiment = single\_pulse.ex2  
Sample Id = S#772676  
Solvent = CHLOROFORM-D  
Creation Time = 22-MAY-2014 21:24:59  
Revision Time = 1-OCT-2014 01:30:05  
Current Time = 1-OCT-2014 01:30:15  
Comment = single\_pulse  
Data Format = 1D COMPLEX  
Dim Size = 26214  
Dim Title = 1H  
Dim Units = [ppm]  
Dimensions = XCA\_600  
Site = DELTA2\_NMR  
Spectrometer = DELTA2\_NMR  
Field Strength = 13.95540559[T] (590 [MHz])  
X\_Acq\_Duration = 2.94125568 [s]  
X\_Domain = 1H  
X\_Freq = 594.17058168 [MHz]  
X\_Offset = 5 [ppm]  
X\_Points = 32768  
X\_Prescans = 1  
X\_Resolution = 0.33999084 [Hz]  
X\_Sweep = 11.14081996 [kHz]  
Irr\_Domain = 1H  
Irr\_Freq = 594.17058168 [MHz]  
Irr\_Offset = 5 [ppm]  
Tri\_Domain = 1H  
Tri\_Freq = 594.17058168 [MHz]  
Tri\_Offset = [ppm]  
Clamped = FALSE  
Mag\_Return = 1  
Scans = 16  
Total\_Scans = 16  
X\_90\_Width = 10.6 [us]  
X\_Acq\_Time = 2.94125568 [s]  
X\_Angle = 45 [deg]  
X\_Atn = 4.9 [dB]  
X\_Pulse = 5.3 [us]  
Irr\_Mode = Off  
Tri\_Mode = Off  
Dante\_Presat = FALSE  
Initial\_Wait = 1 [s]  
Recvr\_Gain = 54  
Relaxation\_Delay = 5 [s]  
Repetition\_Time = 2.94125568 [s]  
Temp\_Get = 21.9 [dC]

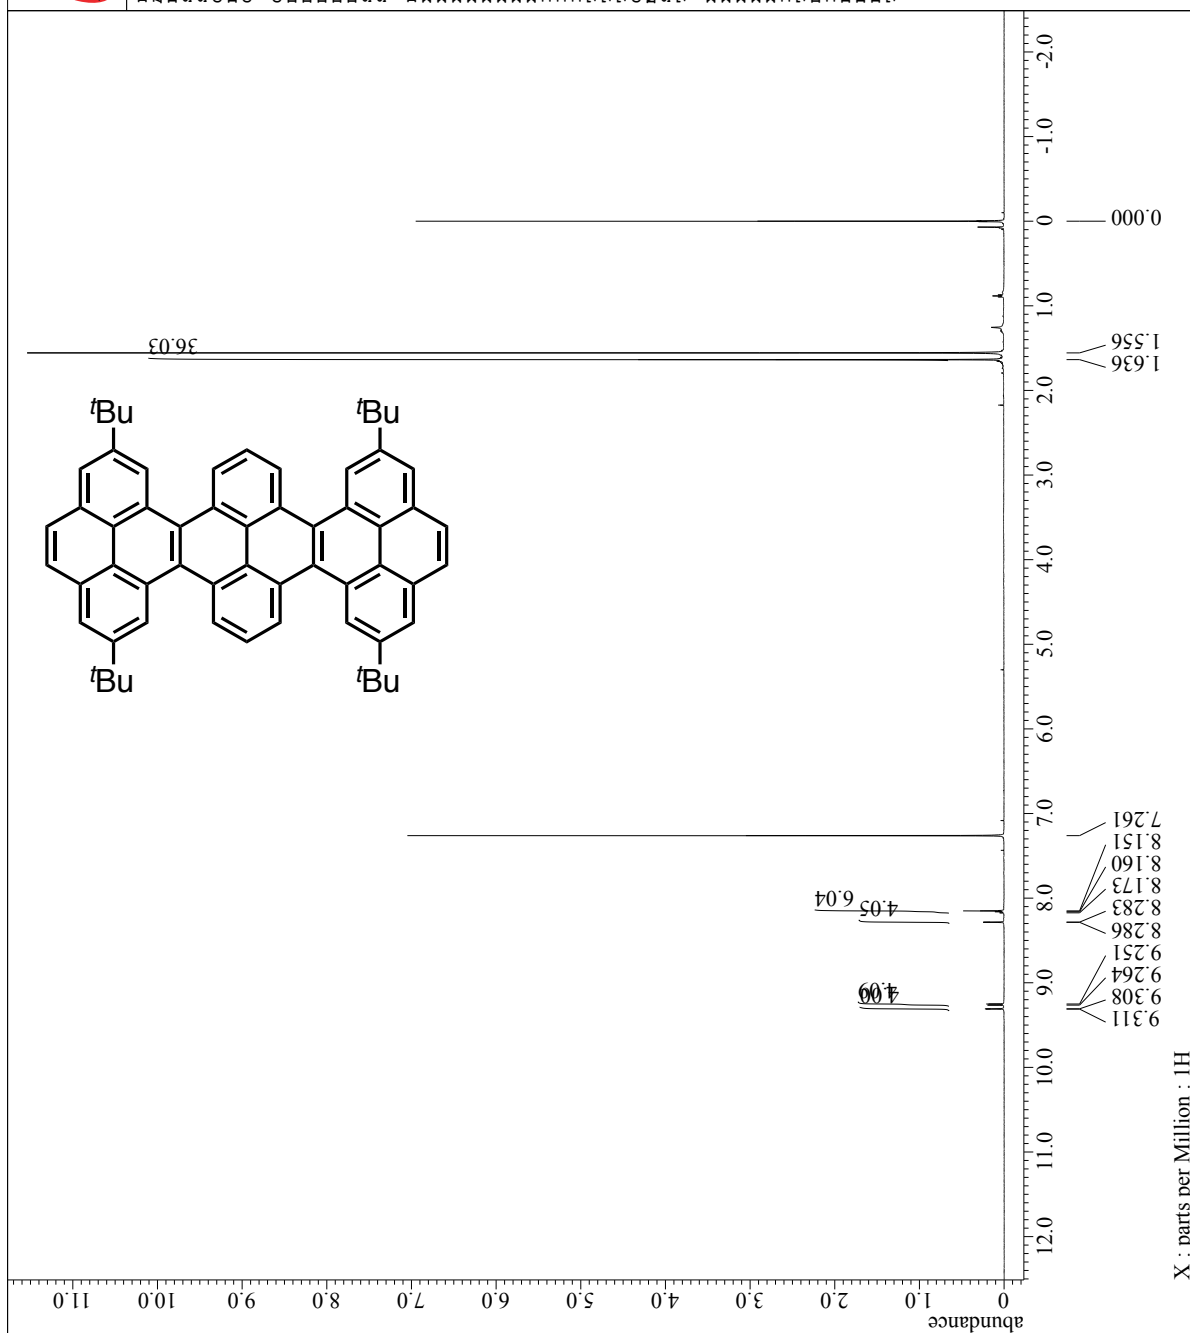

Supplementary Figure 37. <sup>1</sup>H NMR (600 MHz, CDCl<sub>3</sub>) of 11

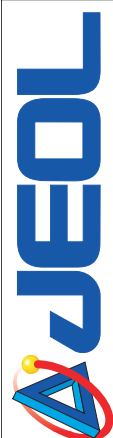

```

= /Users/kyoheiozaki/Desktop
= delta
= carbonyl.jp
= 071460-data2
= CHLOROPWR-D
= 24-MAY-2014 01:31:51
= 28-MAY-2014 21:08:05
= 20-NOV-2014 01:57:33
= single pulse decoupled gat
= 1D COMPLEX
= 26214
= Carbon13
= [ppm]
= X
= JNM-ECA600II
= DELTA2_NMR
Spectrometer
Field Strength = 14.09636928 [T] (600 [MHz])
X_Acq_Duration = 0.69206016 [s]
X_Domain = 13C
X_Freq = 150.91343039 [MHz]
X_Offset = 100 [ppm]
X_Points = 32768
X_Prescans = 4
X_Resolution = 4.44496109 [Hz]
X_Sweep = 47.34848485 [kHz]
X_Sweep_Clippped = 37.87878788 [kHz]
X_Sweep_Drain = Protocl
X_Irr_Freq = 600.1723046 [MHz]
X_Irr_Offset = 5 [ppm]
X_Irr_Offset = FALSE
Mod_Return = 1
Probe_Recovery = 75 [us]
Scans = 13501
Total_Scans = 13501
X_90_Width = 8.5 [us]
X_Acq_Time = 0.69206016 [s]
X_Angle = 30 [deg]
X_Atn = 12.2 [dB]
X_Pulse = 2.83333333 [us]
Irr_Atn_Dec = 18.4 [dB]
Irr_Atn_Noie = 18.4 [dB]
Irr_Width = WALTZ
Decoupling = TRUE
Initial_Wait = 73 [us]
Noe_Time = 1 [s]
Relaxation = TRUE
Relaxation_Delay = 2 [s]
Repetition_Time = 2.69206016 [s]
Temp_Get = 24.4 [dC]
  
```

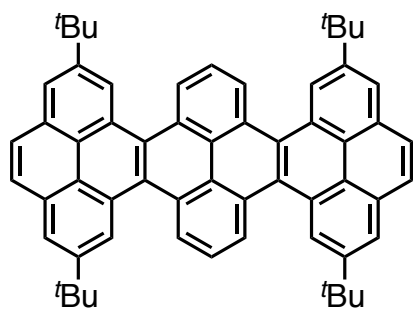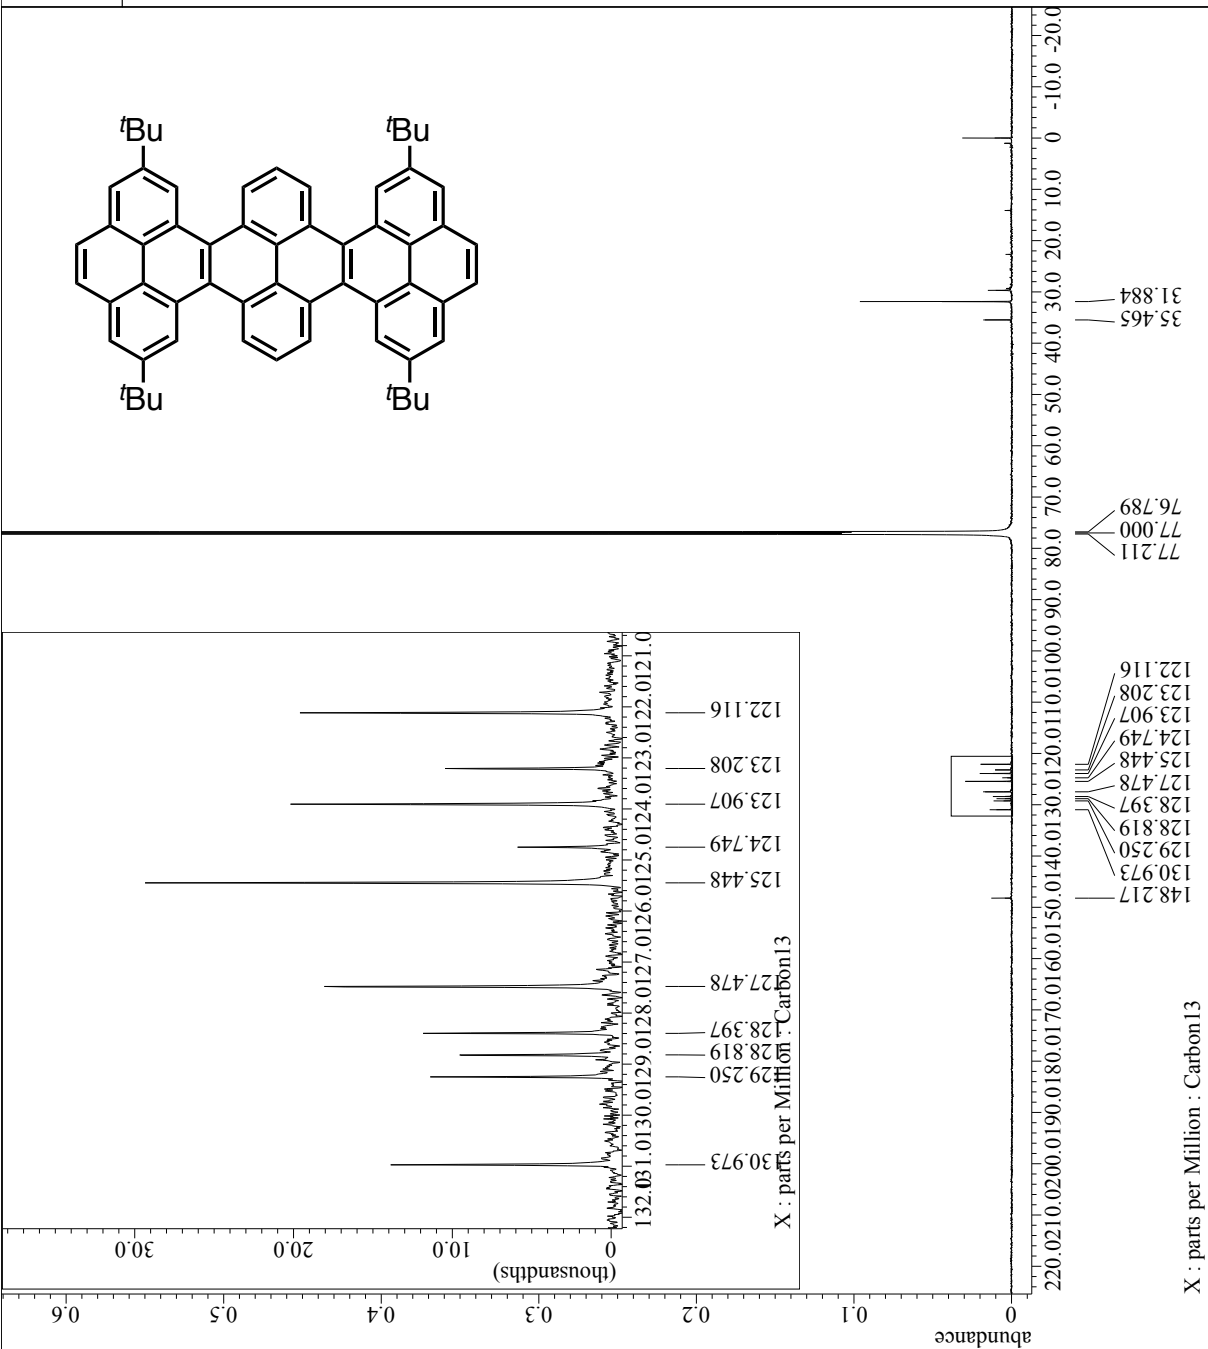

Supplementary Figure 38. <sup>13</sup>C NMR (150 MHz, CDCl<sub>3</sub>) of 11

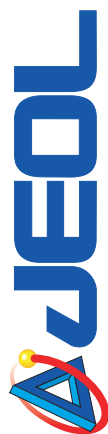

```

/Users/kycheiozaki/Desktop
= delta
= single_pulse.ex2
= S#462865
= CHLOROFORM-D
= 28-MAY-2014 12:47:32
= 1-OCT-2014 01:33:23
= 1-OCT-2014 01:33:30
= single_pulse
= 1D COMPLEX
= 26214
= 1H
= [ppm]
= XCS 600
= DELTAZ_NMR
Spectrometer
Field Strength = 13.95540559[T] (590 [MHz])
X_Acq_Duration = 2.94125568[s]
X_Domain = 1H
X_Freq = 594.17058168 [MHz]
X_Offset = 5 [ppm]
X_Points = 32768
X_Prescans = 1
X_Resolution = 0.33999084 [Hz]
X_Sweep = 11.14081996 [kHz]
Irr_Domain = 1H
Irr_Freq = 594.17058168 [MHz]
Irr_Offset = 5 [ppm]
Tri_Domain = 1H
Tri_Freq = 594.17058168 [MHz]
Tri_Offset = 5 [ppm]
Clipped = FALSE
Lock_Return = 1
Scans = 8
Total_Scans = 8
X_90_Width = 10.6 [us]
X_Acq_Time = 2.94125568 [s]
X_Angle = 45 [deg]
X_Atn = 4.9 [dB]
X_Pulse = 5.3 [us]
Irr_Mode = Off
Tri_Mode = Off
Dante_Preset = FALSE
Initial_Wait = 1 [s]
Recvr_Gain = 54
Relaxation_Delay = 5 [s]
Repetition_Time = 7.94125568 [s]
Temp_Get = 22.4 [dC]
  
```

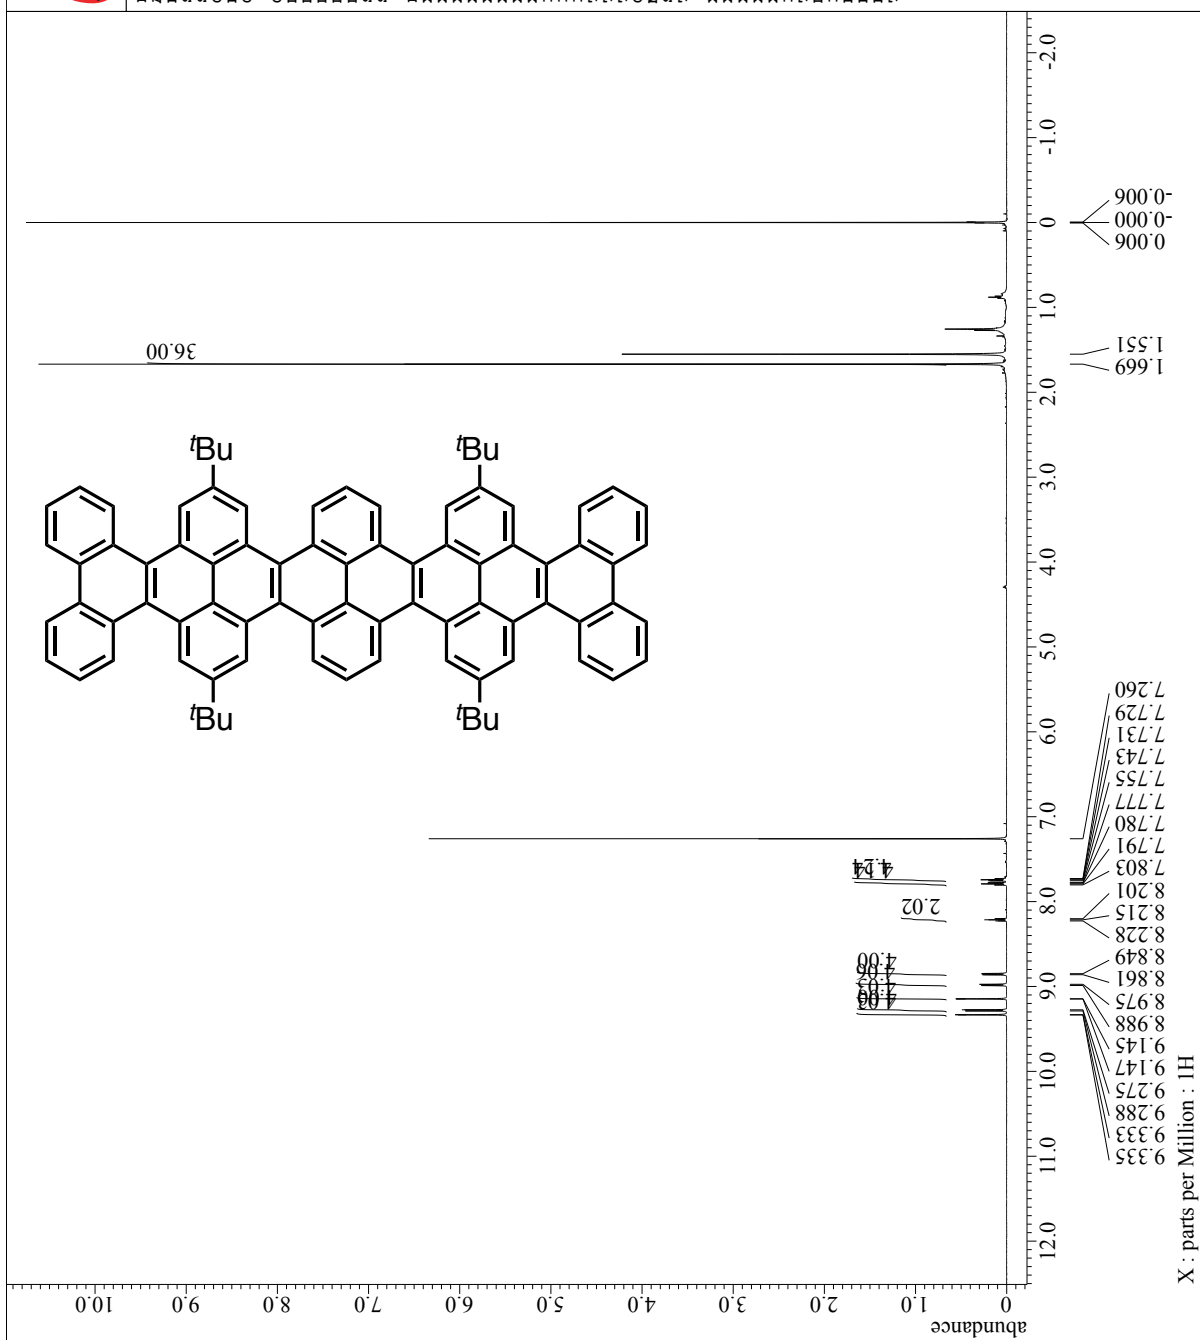

Supplementary Figure 39. <sup>1</sup>H NMR (600 MHz, CDCl<sub>3</sub>) of 12

```

= /Users/kyoheiozaki/desktop
= deita
= single_pulse_dec
= 1
= CHLOROFORM-D
= 29-MAY-2014 09:29:32
= 18-NOV-2014 22:28:01
= 20-NOV-2014 01:58:22
= 13C-single_pulse_dec
= 1D_COMFEX
= 2621.4
= 13C
= [ppm]
= X
= ECA 600
= DELTA2_NMR
= 13.95540559 [T] (590 [MHz])
= 0.69730304 [s]
= 13C
= 149.40429612 [MHz]
= 100 [ppm]
= 32768
= 4
= 1.43409672 [Hz]
= 46.9924812 [kHz]
= 594.17058168 [MHz]
= 5 [ppm]
= 1
= PAUSE
= 19208
= 19208
= 8.6 [us]
= 0.69730304 [s]
= 30 [deg]
= 6.9 [dB]
= 2.86666667 [us]
= 22.01015 [dB]
= 22.01015 [dB]
= WALTZ
= TRUE
= TRUE
= 1 [s]
= 1 [s]
= 58
= 1 [s]
= 1.69730304 [s]
= 23.8 [dC]
  
```

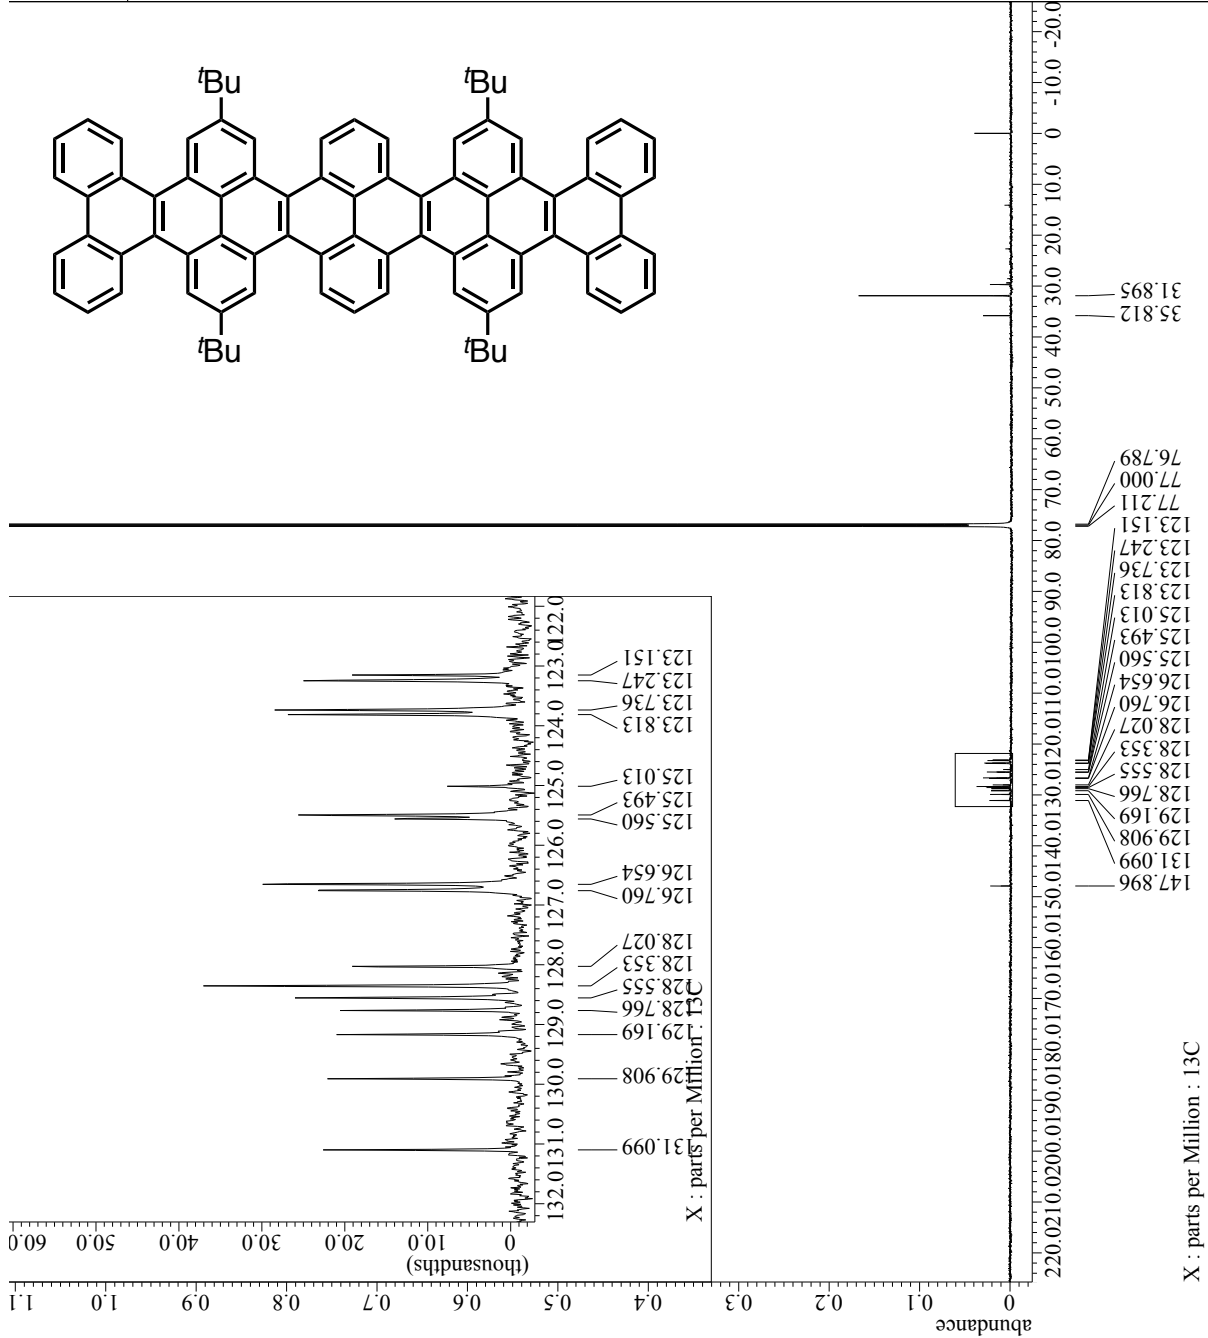

Supplementary Figure 40. <sup>13</sup>C NMR (150 MHz, CDCl<sub>3</sub>) of 12



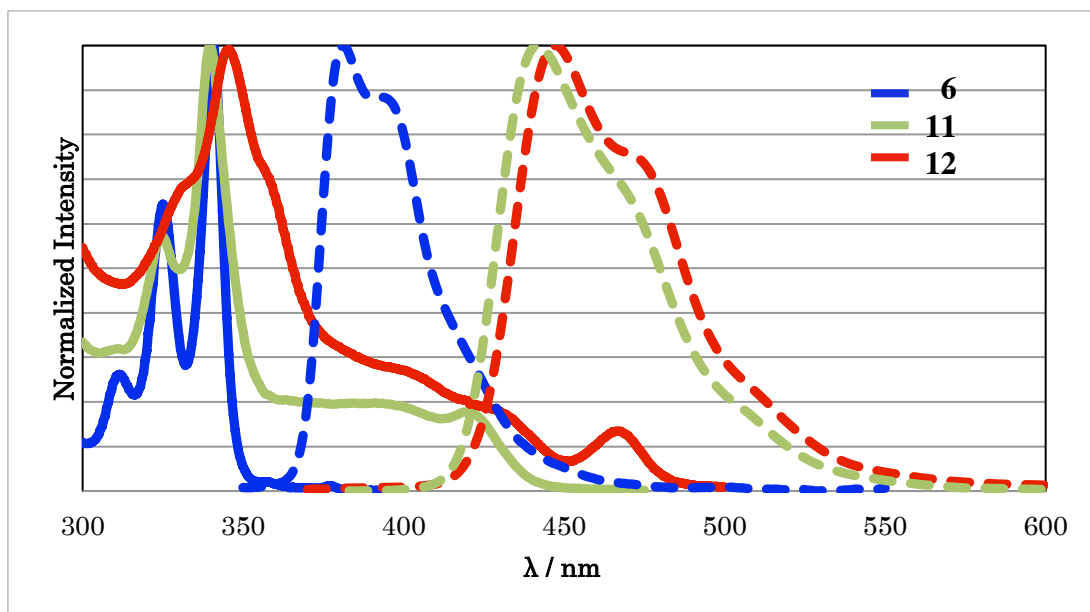

**Supplementary Figure 41.** UV-vis absorption (solid line) and fluorescence spectra (broken line) of **6**, **11**, and **12** in cyclohexane. Absorption and fluorescence spectra were normalized.

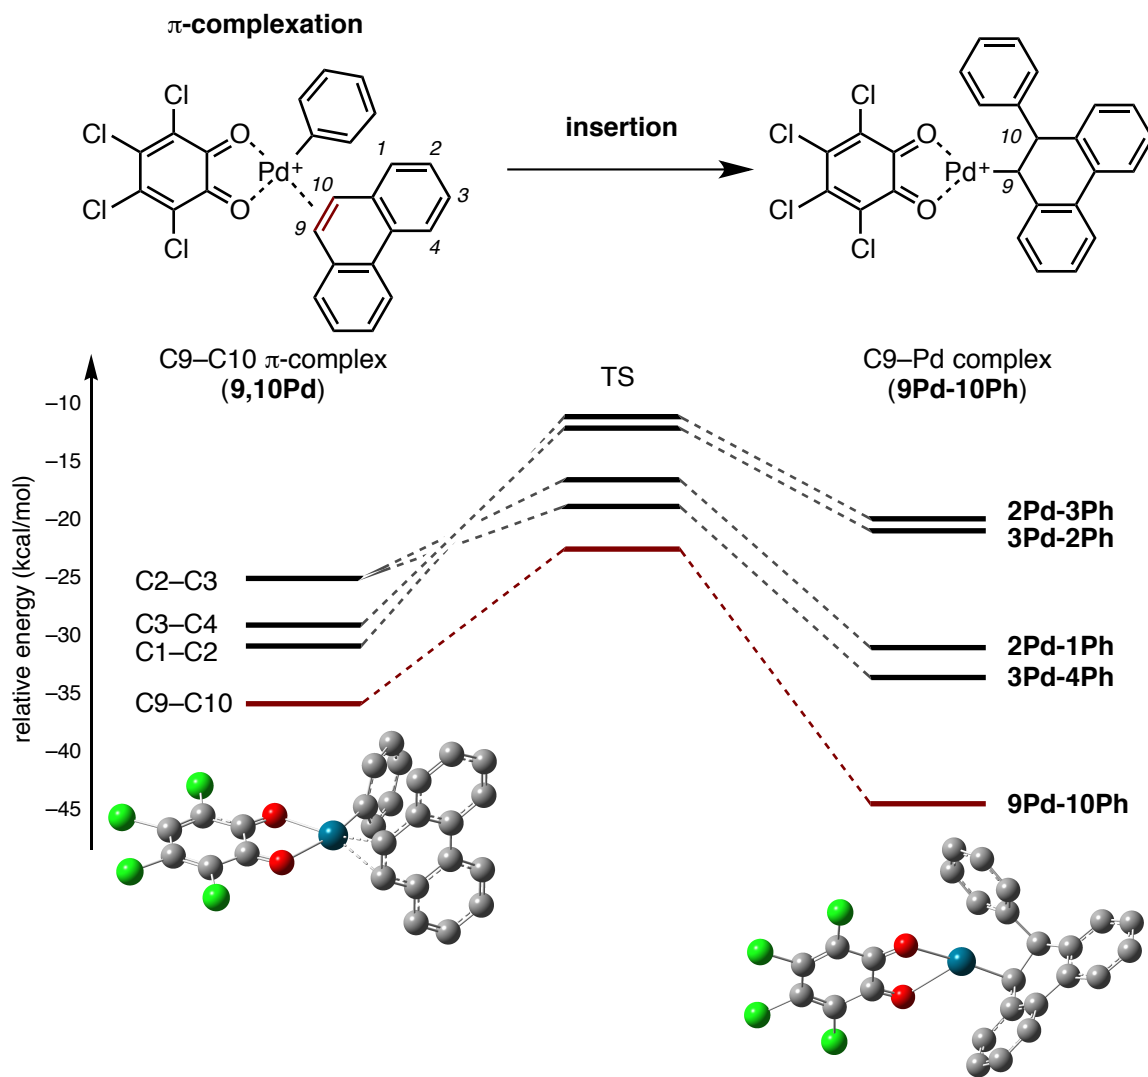

**Supplementary Figure 42.** Energy surface of  $\pi$ -complexation and insertion

**Supplementary Table 1.** Uncorrected and zero-point/thermal-corrected (353.15K) energies of stationary points (Hartree) and their Cartesian coordinates.<sup>a</sup>

| compound           | SCS-MP2        | ZPE-corrected | H            | G            |
|--------------------|----------------|---------------|--------------|--------------|
| <b>9,10Pd</b>      | -3112.28758017 | -3111.952546  | -3111.911379 | -3112.037355 |
| <b>TS_9Pd-10Ph</b> | -3112.26739205 | -3111.932653  | -3111.892403 | -3112.015648 |
| <b>9Pd-10Ph</b>    | -3112.30257031 | -3111.965748  | -3111.925322 | -3112.049677 |
| <b>1,2Pd</b>       | -3112.27922752 | -3111.944296  | -3111.903161 | -3112.029096 |
| <b>TS_2Pd-3Ph</b>  | -3112.25061561 | -3111.916266  | -3111.876115 | -3111.998444 |
| <b>2Pd-3Ph</b>     | -3112.26477025 | -3111.928666  | -3111.888330 | -3112.011000 |
| <b>2,3Pd_1</b>     | -3112.27230942 | -3111.937552  | -3111.896336 | -3112.022723 |
| <b>TS_2Pd-1Ph</b>  | -3112.25914851 | -3111.924700  | -3111.884439 | -3112.007596 |
| <b>2Pd-1Ph</b>     | -3112.28180495 | -3111.945207  | -3111.904938 | -3112.027455 |
| <b>2,3Pd_2</b>     | -3112.27249533 | -3111.937763  | -3111.896527 | -3112.023023 |
| <b>TS_3Pd-4Ph</b>  | -3112.26270610 | -3111.928156  | -3111.887933 | -3112.010646 |
| <b>3Pd-4Ph</b>     | -3112.28587841 | -3111.949187  | -3111.908972 | -3112.031041 |
| <b>3-4Pd</b>       | -3112.28066663 | -3111.945701  | -3111.904573 | -3112.030501 |
| <b>TS_3Pd-2Ph</b>  | -3112.25108298 | -3111.916719  | -3111.876578 | -3111.998839 |
| <b>3Pd-2Ph</b>     | -3112.26532032 | -3111.929213  | -3111.888909 | -3112.011259 |

(a) E: electronic energy; ZPE: zero-point energy; H (=E+ZPE+E<sub>vib</sub>+E<sub>rot</sub>+E<sub>trans</sub>+RT): sum of electronic and thermal enthalpies; G (=H-TS): sum of electronic and thermal free energies

|                    |             |             |             |                 |             |             |             |              |             |             |             |
|--------------------|-------------|-------------|-------------|-----------------|-------------|-------------|-------------|--------------|-------------|-------------|-------------|
| <b>9,10Pd</b>      |             |             |             | C               | 2.27975900  | -2.08406800 | -0.32886500 | C            | 2.10782200  | 3.33356800  | 0.54634800  |
| O                  | -1.16586400 | 1.12955600  | 0.42833200  | H               | 1.72055500  | -1.29054300 | -2.28947200 | H            | 3.60464500  | 1.87247300  | 1.03297200  |
| O                  | -1.26581600 | -1.15066900 | -0.94787600 | C               | 2.03884300  | 1.66383100  | -0.56373000 | C            | 5.62557500  | -1.12270400 | 1.63180500  |
| C                  | -2.26847900 | 0.76384300  | 0.01020200  | C               | 4.30144000  | -0.03454000 | -0.45656300 | H            | 5.97727900  | 1.46234600  | -1.21727200 |
| C                  | -3.48903000 | 1.50768100  | 0.23094600  | H               | 3.28816400  | 0.56411100  | -2.27299900 | C            | 6.91778900  | 0.56829600  | 0.49714100  |
| C                  | -2.32588500 | -0.54633800 | -0.78043200 | C               | 1.34657300  | -3.14190200 | -0.33284100 | C            | 1.97190400  | -3.50836400 | 1.85510500  |
| C                  | -4.66599800 | 1.01829200  | -0.27448900 | C               | 3.32162000  | -2.05559200 | 0.63896200  | H            | 0.31757700  | -4.29828300 | 0.71241200  |
| C                  | -3.60468600 | -1.00147100 | -1.28366100 | C               | 1.84236900  | 2.63490400  | -1.55686700 | H            | 3.69037400  | -2.61936100 | 2.76378100  |
| C                  | -4.72417200 | -0.24914100 | -1.03932600 | C               | 2.39739900  | 2.03222600  | 0.74086000  | C            | 1.15340600  | 3.77211700  | -0.38691200 |
| Cl                 | -3.37591400 | 2.96050900  | 1.11644400  | C               | 4.37637700  | -1.03989700 | 0.54024700  | H            | 0.22082000  | 3.39399000  | -2.29088900 |
| Cl                 | -6.11381600 | 1.87233700  | -0.02944200 | C               | 5.34568600  | 0.89557200  | -0.61180900 | H            | 2.27541000  | 3.90511700  | 1.45530200  |
| Cl                 | -6.23535300 | -0.76399800 | -1.62032100 | C               | 1.39931900  | -4.13601000 | 0.62880900  | C            | 6.78669400  | -0.36715700 | 1.52514200  |
| Cl                 | -3.62685900 | -2.46587300 | -2.15939100 | H               | 0.57793200  | -3.16306800 | -1.10014300 | H            | 5.56224000  | -1.86889600 | 2.41657000  |
| Pd                 | 0.58425000  | -0.13359000 | -0.00600600 | C               | 3.33467100  | -3.06721400 | 1.61700200  | H            | 7.82824900  | 1.15158300  | 0.39746300  |
| C                  | 1.92831300  | -1.95620200 | -0.01490400 | C               | 1.96207200  | 3.98593300  | -1.22384500 | H            | 1.78916700  | -4.14905600 | 2.71307600  |
| C                  | 2.14484500  | -1.24904000 | -1.20763800 | H               | 1.59948600  | 2.34707300  | -2.57734000 | H            | 0.59197600  | 4.68314600  | -0.19864900 |
| C                  | 2.96690900  | -2.05302000 | 0.98095900  | C               | 2.50358700  | 3.38384100  | 1.06115200  | H            | 7.59557300  | -0.51922700 | 2.23334100  |
| H                  | 1.09629700  | -2.65692800 | 0.05433200  | H               | 2.60284300  | 1.27464900  | 1.49346000  |              |             |             |             |
| C                  | 1.82794500  | 1.06431600  | 0.93363700  | C               | 5.51687900  | -1.05484900 | 1.36828700  |              |             |             |             |
| C                  | 3.41089900  | -0.60645400 | -1.46128500 | H               | 5.26406300  | 1.65639800  | -1.38407900 | <b>1,2Pd</b> | 1.69889300  | 0.50507000  | -0.30945400 |
| H                  | 1.48028700  | -1.40625900 | -2.05720500 | C               | 6.45848300  | 0.85190000  | 0.20836600  | O            | 0.96746500  | -1.85102300 | 0.69278900  |
| C                  | 2.75164900  | -2.80781500 | 2.15141000  | C               | 2.39020700  | -4.08404000 | 1.61837800  | C            | 2.53996400  | -0.40504800 | -0.31209700 |
| C                  | 4.22201600  | -1.42115200 | 0.75275400  | H               | 0.67954300  | -4.94871600 | 0.61628700  | C            | 3.87651900  | -0.24447100 | -0.83314400 |
| C                  | 2.36382200  | 2.14000400  | 0.23568700  | H               | 4.09918100  | -3.07274000 | 2.38564200  | C            | 2.12236700  | -1.75205500 | 0.26747400  |
| C                  | 1.98014000  | 0.91230100  | 2.30665600  | C               | 2.28868600  | 4.35865800  | 0.08103000  | C            | 4.74158100  | -1.30892100 | -0.78523200 |
| C                  | 4.44792700  | -0.68598500 | -0.48923100 | H               | 1.80721100  | 4.74350900  | -1.98791300 | C            | 3.08521700  | -2.83071600 | 0.28691300  |
| C                  | 3.63091900  | 0.05668400  | -2.68510700 | H               | 2.76713100  | 3.67696500  | 2.07420900  | C            | 4.34170300  | -2.61479900 | -0.21927700 |
| C                  | 3.74694000  | -2.93360600 | 3.10259700  | C               | 6.53514200  | -0.12771400 | 1.20943900  | Cl           | 4.29518100  | 1.27924600  | -1.47650000 |
| H                  | 1.79117300  | -3.29275700 | 2.29454900  | H               | 5.62378900  | -1.81172500 | 2.13693100  | Cl           | 6.32236400  | -1.14465900 | -1.38718200 |
| C                  | 5.21405300  | -1.56343200 | 1.74415600  | H               | 7.26513500  | 1.56666500  | 0.07793800  | Cl           | 5.48866600  | -3.86925700 | -0.20730400 |
| C                  | 3.07448000  | 3.10928700  | 0.95430500  | H               | 2.43322200  | -4.85274500 | 2.38439800  | Cl           | 2.58085200  | -4.32171200 | 0.94753400  |
| H                  | 2.24810900  | 2.23912800  | -0.84067500 | H               | 2.39093000  | 5.41070200  | 0.33360400  | Pd           | -0.26671000 | 0.07839600  | 0.49870800  |
| C                  | 2.69413700  | 1.89203800  | 3.00751700  | H               | 7.40403300  | -0.17087200 | 1.85964000  | C            | -2.51980700 | 0.54943200  | 2.74043500  |
| H                  | 1.56660700  | 0.05855100  | 2.83759100  |                 |             |             |             | C            | -1.84977400 | -0.50462500 | 2.06703900  |
| C                  | 5.67571900  | -0.06319800 | -0.79243300 | <b>9Pd-10Ph</b> |             |             |             | C            | -3.60018100 | 1.16817300  | 2.15426400  |
| H                  | 2.82991200  | 0.08799900  | -3.41992000 | O               | -0.82511600 | 0.73880900  | 0.61766600  | C            | -2.29845600 | -0.89684800 | 0.78421200  |
| C                  | 4.84858200  | 0.65297600  | -2.95530200 | O               | -1.24056000 | -0.97207000 | -1.38524100 | C            | -4.08348000 | 0.80180100  | 0.86948900  |
| C                  | 4.98255400  | -2.29954100 | 2.89432900  | C               | -1.98862100 | 0.43082200  | 0.35883100  | H            | -4.10135100 | 1.95389700  | 2.70825700  |
| H                  | 3.57841500  | -3.52138300 | 3.99980000  | C               | -3.13346000 | 0.97017400  | 1.06478000  | C            | -3.42564100 | -0.25438000 | 0.17841900  |
| H                  | 6.18406400  | -1.09687100 | 1.61634900  | C               | -2.22214100 | -0.58454200 | -0.76303200 | H            | -1.97537200 | -1.84985100 | 0.36554400  |
| C                  | 3.23829500  | 2.98573600  | 2.33404500  | C               | -4.38930500 | 0.52393600  | 0.74724900  | C            | -5.23128200 | 1.44018500  | 0.25752400  |
| H                  | 3.49909600  | 3.95837200  | 0.42415800  | C               | -3.58413900 | -1.02536200 | -1.02560900 | C            | -3.91215700 | -0.70053400 | -1.08235200 |
| H                  | 2.82147800  | 1.78945900  | 4.08248600  | C               | -4.61723300 | -0.48671500 | -0.30838200 | C            | -5.68513500 | 0.96936700  | -1.01105100 |
| C                  | 5.87217500  | 0.59406700  | -1.99568200 | Cl              | -2.83112500 | 2.12737900  | 2.28550800  | C            | -5.93003600 | 2.51254900  | 0.86769400  |
| H                  | 6.49364600  | -0.09450500 | -0.08183200 | Cl              | -5.74363900 | 1.13070600  | 1.58089900  | C            | -5.00475600 | -0.11068300 | -1.65165500 |
| H                  | 5.01534700  | 1.15711200  | -3.90234600 | Cl              | -6.21945100 | -0.97355900 | -0.62063400 | H            | -3.40805100 | -1.52444000 | -1.58077900 |
| H                  | 5.76942000  | -2.39301500 | 3.63710200  | Cl              | -3.80149800 | -2.18981800 | -2.25569200 | C            | -6.80923600 | 1.57142000  | -1.62148100 |
| H                  | 3.79194800  | 3.74158000  | 2.88469400  | Pd              | 0.93600300  | -0.02782200 | -0.54084200 | C            | -7.02594900 | 3.08631500  | 0.24048400  |
| H                  | 6.83157200  | 1.06027300  | -2.20017100 | C               | 2.57988800  | -0.87579600 | -1.39764000 | H            | -5.61306700 | 2.90679400  | 1.81686800  |
|                    |             |             |             | C               | 3.58572400  | 0.25300300  | -1.28798300 | H            | -5.37824800 | -0.46275200 | -2.60987500 |
|                    |             |             |             | C               | 2.46475800  | -1.83246300 | -0.32106000 | H            | -7.14533500 | 1.19765100  | -2.58514200 |
| <b>TS_9Pd-10Ph</b> |             |             |             | H               | 2.26977400  | -1.19118700 | -2.39577000 | C            | -7.47283000 | 2.61421200  | -1.00740000 |
| O                  | -1.14624800 | 1.36928500  | 0.15064300  | C               | 2.67441500  | 1.44405100  | -0.87617700 | H            | -7.54538300 | 3.90806800  | 0.72449900  |
| O                  | -1.18847000 | -1.12728600 | -0.75391200 | C               | 4.70174200  | -0.01006500 | -0.30831800 | H            | -8.33627300 | 3.06940400  | -1.48313100 |
| C                  | -2.23689700 | 0.80330700  | 0.11671200  | H               | 4.02006400  | 0.48123500  | -2.26739000 | H            | -1.15863600 | -1.13776700 | 2.62075300  |
| C                  | -3.48394800 | 1.42284000  | 0.52504500  | C               | 1.38332800  | -2.75772600 | -0.34897600 | H            | -2.19690600 | 0.84131300  | 3.73478200  |
| C                  | -2.25993300 | -0.64074700 | -0.38768000 | C               | 3.35213500  | -1.79614700 | 0.80083200  | C            | -0.90875800 | 1.89729500  | 0.12084100  |
| C                  | -4.64122800 | 0.69328300  | 0.46885700  | C               | 1.68554300  | 1.88319600  | -1.80470600 | C            | -1.47458700 | 2.16458800  | -1.11958300 |
| C                  | -3.51970400 | -1.35190400 | -0.41586700 | C               | 2.85326300  | 2.18756700  | 0.31545100  | C            | -0.61322400 | 2.89852800  | 1.03910800  |
| C                  | -4.65901700 | -0.70858300 | -0.00746900 | C               | 4.56125400  | -0.95749200 | 0.72655000  | C            | -1.75749000 | 3.49672200  | -1.44751600 |
| Cl                 | -3.41481000 | 3.03881200  | 1.06664700  | C               | 5.87695300  | 0.73805300  | -0.41211800 | H            | -1.70314000 | 1.37197300  | -1.82746200 |
| Cl                 | -6.11365000 | 1.39350500  | 0.95438300  | C               | 1.13862200  | -3.58893900 | 0.73917200  | C            | -0.90378800 | 4.22385200  | 0.69309600  |
| Cl                 | -6.15128900 | -1.52242900 | -0.04186000 | H               | 0.77886100  | -2.83393900 | -1.24931200 | H            | -0.16258200 | 2.67565000  | 2.00282200  |
| Cl                 | -3.50233800 | -2.96485100 | -0.97818200 | C               | 3.06110300  | -2.63287500 | 1.88060300  | C            | -1.47536200 | 4.52117400  | -0.54447700 |
| Pd                 | 0.65716500  | 0.17094600  | -0.59880600 | C               | 0.94060800  | 3.05179500  | -1.55210900 | H            | -2.20210700 | 3.72266000  | -2.41371400 |
| C                  | 2.18382300  | -1.03121800 | -1.33312400 | H               | 1.62030900  | 1.41589700  | -2.78592800 | H            | -0.67568200 | 5.01947300  | 1.39841700  |
| C                  | 3.14785800  | 0.03285400  | -1.33709900 |                 |             |             |             |              |             |             |             |

|                   |              |             |             |                |             |             |             |                   |             |             |             |
|-------------------|--------------|-------------|-------------|----------------|-------------|-------------|-------------|-------------------|-------------|-------------|-------------|
| H                 | -1.69837300  | 5.55215500  | -0.80576900 | C              | -2.45873700 | 1.73354200  | 2.09138600  | C                 | 7.51981500  | -0.25501700 | 0.88553500  |
| <b>TS_2Pd-3Ph</b> |              |             |             | C              | -1.82827400 | 0.37710800  | 2.33812900  | C                 | 6.54768800  | -1.86825300 | 2.39003300  |
| O                 | -0.64776800  | -0.25098400 | -2.86963000 | C              | -3.62245100 | 1.71225200  | 1.16657500  | H                 | 4.55928900  | -2.50060100 | 1.98848800  |
| O                 | 1.22236800   | -2.45802500 | -1.49569900 | C              | -2.20492900 | -0.70664900 | 1.51080500  | H                 | 8.35160500  | 0.37201400  | 0.57567700  |
| C                 | 0.13715100   | -1.20430400 | -2.95767200 | C              | -3.97515000 | 0.64354900  | 0.39805300  | C                 | 7.63131100  | -1.05987900 | 2.00209700  |
| C                 | 1.38370900   | -1.15558000 | -3.68792300 | H              | -4.17143700 | 2.64613400  | 1.08895900  | H                 | 6.63348300  | -2.50380800 | 3.26640900  |
| C                 | -0.26270200  | -2.49937600 | -2.27813700 | C              | -3.19360000 | -0.58887800 | 0.51819500  | H                 | 8.55150600  | -1.07135400 | 2.57847700  |
| C                 | 2.09718000   | -2.31363800 | -3.86925800 | H              | -1.77533900 | -1.68693800 | 1.70008000  | H                 | 0.92933000  | -1.08916700 | -2.69929600 |
| C                 | 0.49835500   | -3.69426000 | -2.55618100 | C              | -5.10131800 | 0.67924800  | -0.55270800 | C                 | 1.43053300  | 1.50392700  | 0.06707700  |
| C                 | 1.64679300   | -3.59684800 | -3.30229800 | C              | -3.49830800 | -1.69386600 | -0.32182600 | C                 | 2.10547100  | 1.38604700  | 1.27492200  |
| Cl                | 1.85374300   | 0.34873500  | -4.34734000 | C              | -5.94454300 | 1.78991200  | -0.70069800 | C                 | 1.42101800  | 2.68017600  | -0.67434300 |
| Cl                | 3.53618000   | -2.29434600 | -4.78085000 | C              | -4.52351500 | -1.62807400 | -1.22274300 | C                 | 2.80201700  | 2.50184700  | 1.75653400  |
| Cl                | 2.59917100   | -4.98059400 | -3.58175400 | C              | -4.52351500 | -1.62807400 | -1.22274300 | H                 | 2.09288600  | 0.46358900  | 1.84891600  |
| Cl                | -0.04655500  | -5.15804100 | -1.86043800 | H              | -2.90696900 | -2.60007600 | -0.22793900 | C                 | 2.12461100  | 3.78390800  | -0.17680300 |
| Pd                | -2.38396200  | -0.51474200 | -1.47442800 | C              | -6.41016600 | -0.45379000 | -2.29001300 | H                 | 0.88538200  | 2.75832600  | -1.61728100 |
| C                 | -4.63870000  | 0.53213800  | -0.42759700 | C              | -6.98957500 | 1.78123500  | -1.61799100 | C                 | 2.81360700  | 3.69392400  | 1.03285100  |
| C                 | -4.03157100  | -0.78192900 | -0.22204900 | H              | -5.80467400 | 2.67681300  | -0.09138900 | H                 | 3.32832000  | 2.42983300  | 2.70529500  |
| C                 | -5.73395900  | 0.64482900  | -1.32573200 | H              | -4.74247600 | -2.48745600 | -1.85179800 | H                 | 2.12910500  | 4.71115100  | -0.74477600 |
| C                 | -4.41860900  | -1.82945800 | -1.09740200 | C              | -6.58326500 | -1.33625300 | -2.90025800 | H                 | 3.35681400  | 4.55478200  | 1.41329900  |
| C                 | -6.11142300  | -0.38553300 | -2.17548200 | H              | -7.22517800 | 0.65792100  | -2.42076100 | <b>TS_2Pd-1Ph</b> |             |             |             |
| H                 | -6.23874900  | 1.60372200  | -1.36560000 | H              | -7.62904000 | 2.65445100  | -1.70698800 | O                 | -1.48557900 | 1.14979800  | 0.27640600  |
| C                 | -5.40903200  | -1.64644800 | -2.08145300 | H              | -8.04273800 | 0.65798100  | -3.13487400 | O                 | -1.56477800 | -1.11452600 | -1.11761600 |
| H                 | -4.01684200  | -2.82672600 | -0.93958200 | H              | -1.41369100 | 0.16826200  | 3.32367500  | C                 | -2.55179000 | 0.53410200  | 0.25714300  |
| C                 | -7.19740800  | -0.25154300 | -3.14667300 | H              | -2.75750500 | 2.22000700  | 3.02912400  | C                 | -3.76447700 | 0.99746500  | 0.90253000  |
| C                 | -5.77119500  | -2.72566200 | -2.94318000 | C              | -1.26785300 | 2.56045400  | 1.48381300  | C                 | -2.57609500 | -0.80068800 | -0.48443500 |
| C                 | -7.51713300  | -1.36252600 | -3.97728000 | C              | -1.34815700 | 3.23650100  | 0.23871300  | C                 | -4.87193000 | 0.19108700  | 0.89993200  |
| C                 | -7.94583800  | 0.93104100  | -3.30166200 | C              | -0.13055000 | 2.79877700  | 2.30740400  | C                 | -3.77042600 | -1.61402100 | -0.42033300 |
| C                 | -6.78047100  | -2.58678200 | -3.84788700 | C              | -0.34361400 | 4.10691900  | -0.15448100 | C                 | -4.87363800 | -1.12961700 | 0.23416400  |
| H                 | -5.23376400  | -3.66572900 | -2.85573400 | H              | -2.20861600 | 3.08044300  | -0.40551300 | C                 | -3.71266500 | 2.52207400  | 1.66735600  |
| C                 | -8.56048200  | -1.25611900 | -4.92075100 | C              | 0.87192300  | 3.69103100  | 1.89500100  | Cl                | -6.29562600 | 0.69717700  | 1.68285500  |
| C                 | -8.96856100  | 1.01526100  | -4.23388400 | H              | -0.09250100 | 2.38548400  | 3.31278400  | Cl                | -6.30078700 | -2.05308300 | 0.28958800  |
| H                 | -7.73770900  | 1.80015400  | -2.68665600 | C              | 0.76454400  | 4.34303700  | 0.67419000  | Cl                | -3.73671600 | -3.12681100 | -1.21282500 |
| H                 | -7.05152200  | -3.41969400 | -4.49162500 | H              | -0.42348500 | 4.61901700  | -1.10947300 | Pd                | 0.21810600  | 0.26681000  | -0.95459100 |
| H                 | -8.79330100  | -2.11463900 | -5.54517700 | H              | 1.71912100  | 3.87911100  | 2.54864800  | C                 | 2.72794600  | 0.34218300  | -1.82311100 |
| C                 | -9.28031500  | -0.08269600 | -5.05065000 | H              | 1.53404200  | 5.04324600  | 0.36156400  | C                 | 1.70041600  | -0.64005900 | -2.09632100 |
| H                 | -9.53239900  | 1.93849200  | -4.32905300 | <b>2,3Pd_1</b> |             |             |             | C                 | 3.81520700  | 0.01519900  | -0.93152100 |
| H                 | -10.08314700 | -0.01040500 | -5.77800900 | O              | -1.46856800 | 1.00530700  | 0.38066500  | H                 | 2.95184700  | 1.05916500  | -2.60650700 |
| H                 | -3.57674400  | -1.01536100 | 0.74041200  | O              | -1.57184600 | -1.27980300 | -0.97716700 | C                 | 1.71141300  | -1.85547000 | -1.32941200 |
| H                 | -4.61367100  | 1.23283800  | 0.40064300  | C              | -2.57674500 | 0.45946300  | 0.25887600  | C                 | 4.91258400  | 0.90898000  | -0.80628900 |
| C                 | -3.07130800  | 1.41189000  | -1.38797900 | C              | -3.79079800 | 1.00786500  | 0.81199600  | C                 | 3.77685700  | -1.18344100 | -0.18039300 |
| C                 | -3.33737800  | 1.97154200  | -2.65106900 | C              | -2.63294000 | -0.85222800 | -0.50958900 | C                 | 2.68789500  | -2.08461300 | -0.38996800 |
| C                 | -2.25846700  | 2.08826300  | -0.45985500 | C              | -4.96898900 | 0.32508500  | 0.63743500  | H                 | 0.95824400  | -2.61125800 | -1.52973800 |
| C                 | -2.74257600  | 3.17900700  | -2.99495800 | C              | -3.90567400 | -1.52281200 | -0.65008400 | C                 | 5.94510200  | 0.62521000  | 0.04316900  |
| H                 | -3.99460500  | 1.46169200  | -3.35081800 | C              | -5.02640200 | -0.95299900 | -0.10068200 | H                 | 4.92069300  | 1.82094700  | -1.39713600 |
| C                 | -1.66956300  | 3.30311900  | -0.82338400 | Cl             | -3.67717000 | 2.48470200  | 1.65943900  | C                 | 4.85755100  | -1.48034100 | 0.73628100  |
| H                 | -2.09742500  | 1.68387500  | 0.53671400  | Cl             | -6.41374500 | 0.94779300  | 1.28140100  | H                 | 2.64893700  | -3.01286600 | 0.16878400  |
| C                 | -1.91152800  | 3.84628200  | -2.08349600 | Cl             | -6.53478500 | -1.72112300 | -0.26098800 | C                 | 5.94620800  | -0.56041200 | 0.83625400  |
| H                 | 2.92992500   | 3.60877500  | -3.97569100 | Cl             | -3.92619800 | -2.99685700 | -1.51116700 | H                 | 6.78782900  | 1.30658900  | 0.12579200  |
| H                 | -1.03415900  | 3.82469400  | -0.11234100 | Pd             | 0.23685200  | 0.05543200  | -0.51780700 | C                 | 4.89282100  | -2.64279100 | 1.54259400  |
| H                 | -1.46553200  | 4.79846800  | -2.35760600 | C              | 2.80657300  | -0.13432600 | -2.23177500 | C                 | 7.01691000  | -0.83443400 | 1.71974100  |
| <b>2Pd-3Ph</b>    |              |             |             | C              | 1.68985900  | -0.93495400 | -1.93450600 | C                 | 5.94866200  | -2.88575100 | 2.39901600  |
| O                 | 1.51798300   | 0.83758900  | -0.31378100 | C              | 3.96036700  | -0.16127800 | -1.43757600 | H                 | 4.08572000  | -3.36594100 | 1.50128200  |
| O                 | 0.93359700   | -1.31012900 | 1.14305500  | H              | 2.79256400  | 0.49453700  | -3.11795000 | H                 | 7.83938400  | -0.12657800 | 1.78035800  |
| C                 | 2.30110100   | -0.12838000 | -0.35812800 | C              | 1.74765400  | -1.78919800 | -0.78998500 | C                 | 7.02166900  | -1.97758900 | 2.49003500  |
| C                 | 3.56299200   | -0.11192500 | -1.05500800 | C              | 5.09242000  | 0.64598400  | -1.78193100 | H                 | 5.95145800  | -3.78630500 | 3.00600200  |
| C                 | 1.86743900   | -1.39609200 | 0.32306500  | C              | 4.01507500  | -1.01870300 | -0.28583500 | H                 | 7.84809000  | -2.18005000 | 3.16464600  |
| C                 | 4.23419000   | -1.29596700 | -1.24847900 | C              | 2.89056900  | -1.80825500 | 0.01031600  | H                 | 1.22419300  | -0.63313000 | -3.07874400 |
| C                 | 2.56161800   | -2.62010500 | 0.01797000  | H              | 0.97042000  | -2.53198500 | -0.62655500 | C                 | 1.58026600  | 1.77142300  | -0.80525900 |
| C                 | 3.72479400   | -2.56316500 | -0.71355700 | C              | 6.22641500  | 0.60680600  | -1.03193800 | C                 | 1.99772500  | 2.03017200  | 0.50923500  |
| Cl                | 4.09960500   | 1.38210900  | -1.69298100 | H              | 5.02824100  | 1.28717200  | -2.65648200 | C                 | 1.23592600  | 2.82279800  | -1.67114000 |
| Cl                | 5.68494700   | -1.31755400 | -2.14627300 | C              | 5.22861300  | -1.05104500 | 0.51366100  | C                 | 2.01191000  | 3.34358500  | 0.96994600  |
| Cl                | 4.62137300   | -3.98565400 | -1.00077100 | H              | 2.90790300  | -2.48705100 | 0.85554100  | H                 | 2.31038700  | 1.21746700  | 1.16008200  |
| Cl                | 1.94808900   | -4.07124000 | 0.68829700  | C              | 6.32998200  | -0.23212600 | 0.12563900  | C                 | 1.25818500  | 4.13593700  | -1.19425000 |
| Pd                | -0.18544800  | 0.63790400  | 1.09828300  | H              | 7.08279300  | 1.21859500  | -1.30305400 | H                 | 0.96081500  | 2.62542300  | -2.70479700 |
|                   |              |             |             | C              | 5.37263000  | -1.86217000 | 1.66056400  | C                 | 1.64339000  | 4.39451000  | 0.12121700  |

|                   |             |             |             |    |             |             |             |                |             |             |             |
|-------------------|-------------|-------------|-------------|----|-------------|-------------|-------------|----------------|-------------|-------------|-------------|
| H                 | 2.31999700  | 3.55044000  | 1.99170500  | Cl | -4.14234200 | -3.08169300 | -0.76620800 | H              | 3.95523700  | -3.13582300 | 2.69773300  |
| H                 | 0.98604900  | 4.95300400  | -1.85750000 | Pd | 0.24137100  | -0.26137200 | -0.06468800 | C              | 7.05877500  | -0.02991900 | 1.32064600  |
| H                 | 1.67314200  | 5.41805500  | 0.48511700  | C  | 2.95508200  | -1.22328600 | -1.15954300 | C              | 6.58545700  | 1.28082600  | -0.64790000 |
| <b>2Pd-1Ph</b>    |             |             |             |    |             |             |             |                |             |             |             |
| O                 | -1.39063100 | 1.29368000  | 0.36852800  | C  | 1.70766300  | -1.78358400 | -0.81277200 | H              | 4.74114600  | 0.92536900  | -1.64204500 |
| O                 | -1.37342800 | -0.90912700 | -1.11970300 | C  | 3.99946500  | -1.10868900 | -0.23685600 | H              | 6.09434900  | -1.93698700 | 2.94150400  |
| C                 | -2.43740300 | 0.64157900  | 0.30088200  | H  | 3.09984600  | -0.91315300 | -2.18842800 | H              | 7.70585400  | -0.29256000 | 2.15342300  |
| C                 | -3.68719100 | 1.04992200  | 0.90616400  | C  | 1.50099800  | -2.25725000 | 0.52060200  | C              | 7.43738400  | 0.94658000  | 0.42379100  |
| C                 | -2.38690700 | -0.67850300 | -0.44491400 | C  | 3.77360800  | -1.58443300 | 1.10006400  | H              | 6.88065400  | 2.05581700  | -1.34922900 |
| C                 | -4.74286000 | 0.17440000  | 0.91514200  | C  | 5.29923100  | -0.55193500 | -0.58609000 | H              | 8.38727000  | 1.45934800  | 0.54173900  |
| C                 | -3.51192400 | -1.57779900 | -0.35153800 | C  | 2.52609400  | -2.13628400 | 1.45157100  | H              | 1.29388600  | -1.82338000 | -2.36783000 |
| C                 | -4.65249500 | -1.15528600 | 0.28489800  | H  | 0.60620000  | -2.82369000 | 0.76657900  | C              | 1.84067200  | 0.96334300  | -0.69490600 |
| Cl                | -3.73950400 | 2.58996200  | 1.64390000  | C  | 4.82724500  | -1.51614400 | 2.06339400  | C              | 2.17682800  | 1.50012600  | 0.55680900  |
| Cl                | -6.20279600 | 0.60698700  | 1.67903200  | C  | 6.31736600  | -0.51246200 | 0.41025100  | C              | 1.76267600  | 1.78548300  | -1.83211500 |
| Cl                | -6.01669900 | -2.17027200 | 0.34893400  | C  | 5.60449700  | -0.05090800 | -1.86851800 | C              | 2.37017900  | 2.87388800  | 0.67667500  |
| Cl                | -3.37370500 | -3.10105900 | -1.11547300 | H  | 2.38425000  | -2.51122900 | 2.46172200  | H              | 2.28871400  | 0.85280100  | 1.42299800  |
| Pd                | 0.34292400  | 0.51244000  | -0.90388600 | C  | 6.04489100  | -1.00607700 | 1.72677200  | C              | 1.96167200  | 3.16166800  | -1.69565700 |
| C                 | 2.94644600  | 0.60827000  | -1.69173700 | H  | 4.64218700  | -1.88735600 | 3.06756400  | H              | 1.55182000  | 1.36203300  | -2.81173700 |
| C                 | 1.82673100  | -0.36444900 | -2.02653500 | C  | 7.58969000  | 0.01251900  | 0.09381600  | C              | 2.26074400  | 3.70339900  | -0.44516800 |
| C                 | 4.04497300  | 0.05976500  | -0.81804200 | C  | 6.85792100  | 0.45947600  | -2.15722100 | H              | 2.61753700  | 3.29807800  | 1.64645700  |
| H                 | 3.39479600  | 1.01590600  | -2.60555300 | H  | 4.85670600  | -0.05644300 | -2.65426800 | H              | 1.89228900  | 3.80393100  | -2.56998300 |
| C                 | 1.78353000  | -1.61831500 | -1.33228100 | H  | 6.84151700  | -0.96740300 | 2.46548300  | H              | 2.42740800  | 4.77255700  | -0.34446400 |
| C                 | 5.21532800  | 0.82493800  | -0.66280500 | H  | 8.35573600  | 0.03151800  | 0.86452600  | <b>3Pd-4Ph</b> |             |             |             |
| C                 | 3.89825800  | -1.15862900 | -0.13614500 | C  | 7.86071100  | 0.49232800  | -1.17214000 | O              | -1.26965100 | 1.34727900  | 0.15154700  |
| C                 | 2.72840900  | -1.95324500 | -0.39280900 | H  | 7.06728300  | 0.83668500  | -3.15389800 | O              | -1.50738500 | -1.15403400 | -0.71529100 |
| H                 | 0.99936800  | -2.32679500 | -1.58307000 | H  | 8.84209900  | 0.89255600  | -1.40801200 | C              | -2.40041900 | 0.85635000  | 0.13551700  |
| C                 | 6.22913600  | 0.39832800  | 0.16720300  | H  | 1.04440000  | -2.10575900 | -1.61557100 | C              | -3.60535300 | 1.58198500  | 0.48326100  |
| H                 | 5.31946200  | 1.75916100  | -1.20906700 | C  | 1.54180600  | 1.18176700  | 0.23744200  | C              | -2.51882000 | -0.60807700 | -0.25696500 |
| C                 | 4.94332900  | -1.61398400 | 0.75301500  | C  | 2.04267600  | 1.38426100  | 1.51679800  | C              | -4.79257300 | 0.90270700  | 0.57237600  |
| H                 | 2.61553100  | -2.90351500 | 0.11743800  | C  | 1.77993700  | 2.06668100  | -0.80846500 | C              | -3.78972700 | -1.27545300 | -0.09735100 |
| C                 | 6.12117500  | -0.81291000 | 0.89503700  | H  | 2.81472000  | 2.52872800  | 1.75350600  | C              | -4.88487500 | -0.54205900 | 0.28395400  |
| H                 | 7.13364600  | 0.99249300  | 0.26974200  | H  | 1.83858500  | 0.68853600  | 2.32636200  | Cl             | -3.44896100 | 3.24777100  | 0.82621900  |
| C                 | 4.86914000  | -2.81651000 | 1.49682900  | C  | 2.55596700  | 3.20380500  | -0.55232400 | Cl             | -6.21117500 | 1.72279800  | 1.03599600  |
| C                 | 7.16556900  | -1.23760400 | 1.75529700  | H  | 1.37973200  | 1.89606100  | -1.80490300 | Cl             | -6.40491400 | -1.29472700 | 0.42380200  |
| C                 | 5.89957300  | -3.20464400 | 2.32966600  | C  | 3.07236700  | 3.43255100  | 0.72309100  | Cl             | -3.85809100 | -2.94407200 | -0.46086600 |
| H                 | 3.99582700  | -3.45559100 | 1.42783500  | H  | 3.20507000  | 2.70874200  | 2.75230200  | Pd             | 0.41246400  | -0.00117200 | -0.67218600 |
| H                 | 8.05312400  | -0.61689000 | 1.84545800  | H  | 2.75387600  | 3.90504400  | -1.35945000 | C              | 3.04632400  | -0.52808300 | -1.11644000 |
| C                 | 7.05961200  | -2.41342500 | 2.46245600  | H  | 3.67368900  | 4.31720200  | 0.91452800  | C              | 1.79368800  | -1.36415200 | -1.35221600 |
| <b>TS_3Pd-4Ph</b> |             |             |             |    |             |             |             |                |             |             |             |
| H                 | 5.81502800  | -4.13196100 | 2.88874600  | O  | -1.38083700 | 1.10179200  | 0.11692000  | C              | 3.95431700  | -1.00212800 | -0.00898800 |
| H                 | 7.86243100  | -2.73383400 | 3.11937600  | O  | -1.72858000 | -1.40282400 | -0.70688000 | H              | 3.62170500  | -0.45348100 | -2.04646900 |
| H                 | 1.42611400  | -0.33488800 | -3.04143900 | C  | -2.52986900 | 0.66272600  | 0.11567700  | C              | 1.46689800  | -2.41480300 | -0.42930100 |
| C                 | 2.15796600  | 1.76755700  | -0.99683100 | C  | -3.69400000 | 1.44088700  | 0.49435100  | C              | 3.52693500  | -2.00996400 | 0.86535700  |
| C                 | 2.37312100  | 2.16541700  | 0.34963600  | C  | -2.72253800 | -0.79497000 | -0.30460600 | C              | 5.23360200  | -0.40320100 | 0.17097300  |
| C                 | 1.28343700  | 2.55714500  | -1.80053300 | C  | -4.92077600 | 0.83310500  | 0.52857700  | C              | 2.26572100  | -2.67060700 | 0.65280000  |
| C                 | 1.76409000  | 3.30644200  | 0.85048200  | C  | -4.04448200 | -1.37784400 | -0.22199100 | H              | 0.58856600  | -3.02459700 | -0.61926800 |
| H                 | 3.04203200  | 1.58629300  | 0.97863600  | C  | -5.09721700 | -0.59173100 | 0.16878400  | C              | 4.36145500  | -2.42690500 | 1.94337200  |
| C                 | 0.68484200  | 3.71647700  | -1.27633700 | C  | -0.07217000 | -0.59173100 | 0.16878400  | C              | 6.06143300  | -0.83959800 | 1.25992700  |
| H                 | 1.18704200  | 2.34290500  | -2.86290700 | Cl | -3.44216600 | 3.07665800  | 0.90920400  | C              | 5.73336400  | 0.62109700  | -0.68243700 |
| C                 | 0.92667700  | 4.08858900  | 0.03847100  | Cl | -6.29613800 | 1.71738600  | 0.99905300  | H              | 1.98172400  | -3.45405500 | 1.35164700  |
| H                 | 1.94880600  | 3.60267500  | 1.87947700  | Cl | -6.66392100 | -1.24835200 | 0.24471000  | C              | 5.58930900  | -1.85679800 | 2.13475100  |
| H                 | 0.05117900  | 4.32508600  | -1.91540300 | Cl | -4.20858400 | -3.02148200 | -0.65573000 | H              | 4.00796900  | -3.21093700 | 2.60752300  |
| H                 | 0.47387400  | 4.99070400  | 0.44033700  | Pd | 0.25291600  | -0.30563100 | -0.65438400 | C              | 7.33587000  | -0.25238100 | 1.44285600  |
| <b>2,3Pd_2</b>    |             |             |             |    |             |             |             |                |             |             |             |
| O                 | -1.42463200 | 1.07619600  | 0.21561800  | C  | 2.81587900  | -0.83876000 | -1.14941300 | C              | 6.97718000  | 1.17447400  | -0.47512900 |
| O                 | -1.66370500 | -1.50272000 | -0.39052800 | C  | 1.65051400  | -1.68059500 | -1.34551900 | H              | 5.13444600  | 0.97726400  | -1.51433600 |
| C                 | -2.57111500 | 0.62379800  | 0.07723000  | C  | 3.72434800  | -1.10094700 | -0.05958000 | H              | 6.22368600  | -2.17801100 | 2.95639200  |
| C                 | -3.76032800 | 1.42846400  | 0.22139300  | H  | 2.23570600  | -0.39595500 | -2.04495800 | H              | 7.95657000  | -0.59608500 | 2.26607300  |
| C                 | -2.70710700 | -0.85518000 | -0.25737800 | C  | 1.34518800  | -2.68033500 | -0.35753400 | C              | 7.78794700  | 0.73539500  | 0.59495400  |
| C                 | -4.98789800 | 0.83422200  | 0.06703400  | C  | 3.36975000  | -2.08843400 | 0.88910500  | H              | 7.34036400  | 1.95155300  | -1.14122300 |
| C                 | -4.03115700 | -1.41779300 | -0.40101200 | C  | 4.96620000  | -0.38499800 | 0.08071200  | H              | 8.76905600  | 1.17615600  | 0.74470400  |
| C                 | -5.12420300 | -0.60323800 | -0.24692800 | C  | 2.16323400  | -2.83972600 | 0.73067700  | H              | 1.49305400  | -1.50486800 | -2.39263400 |
| Cl                | -3.55580900 | 3.08276600  | 0.58617200  | H  | 0.48561300  | -3.32636800 | -0.50643400 | C              | 2.42353400  | 0.87725400  | -0.82785200 |
| Cl                | -6.40488800 | 1.75740000  | 0.23891600  | C  | 4.24360000  | -2.37233500 | 1.98055600  | C              | 2.57853700  | 1.55958000  | 0.40843500  |
| Cl                | -6.69014700 | -1.24268000 | -0.41818800 | C  | 5.82581700  | -0.70780200 | 1.17589700  | C              | 1.78589100  | 1.56711000  | -1.90172900 |
|                   |             |             |             | C  | 5.37786400  | 0.63290400  | -0.81369000 | C              | 2.14219500  | 2.86929700  | 0.54811200  |
|                   |             |             |             | H  | 1.92648400  | -3.59317900 | 1.47761500  | H              | 3.07039200  | 1.05874500  | 1.23652000  |
|                   |             |             |             | C  | 5.42893000  | -1.70820100 | 2.11308100  | C              | 1.36276900  | 2.89837500  | -1.74322500 |



Supplementary Table 2. Effect of catalyst <sup>a</sup>

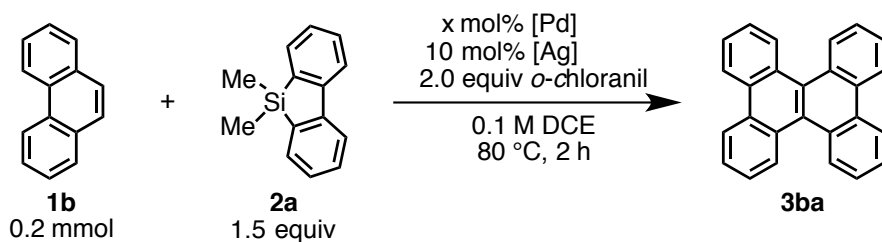

| entry | [Pd]                                                                 | x       | [Ag]               | yield <sup>b</sup> |
|-------|----------------------------------------------------------------------|---------|--------------------|--------------------|
| 1     | Pd(OAc) <sub>2</sub>                                                 | 5 mol%  | none               | nd                 |
| 2     | Pd(OAc) <sub>2</sub>                                                 | 5 mol%  | AgOTf              | 12%                |
| 3     | Pd(OCOCF <sub>3</sub> ) <sub>2</sub>                                 | 5 mol%  | AgOTf              | 23%                |
| 4     | PdCl <sub>2</sub>                                                    | 5 mol%  | AgOTf              | 36%                |
| 5     | PdCl <sub>2</sub>                                                    | 5 mol%  | AgBF <sub>4</sub>  | 37%                |
| 6     | PdCl <sub>2</sub>                                                    | 5 mol%  | AgPF <sub>6</sub>  | 2%                 |
| 7     | PdCl <sub>2</sub>                                                    | 5 mol%  | AgSbF <sub>6</sub> | 41%                |
| 8     | Pd(CH <sub>3</sub> CN) <sub>4</sub> (BF <sub>4</sub> ) <sub>2</sub>  | 5 mol%  | none               | 48%                |
| 9     | Pd(CH <sub>3</sub> CN) <sub>4</sub> (SbF <sub>6</sub> ) <sub>2</sub> | 5 mol%  | none               | 43% (43%)          |
| 10    | Pd(CH <sub>3</sub> CN) <sub>4</sub> (SbF <sub>6</sub> ) <sub>2</sub> | 10 mol% | none               | (33%)              |
| 11    | Pd(CH <sub>3</sub> CN) <sub>4</sub> (SbF <sub>6</sub> ) <sub>2</sub> | 20 mol% | none               | (25%)              |
| 12    | Pd(CH <sub>3</sub> CN) <sub>4</sub> (SbF <sub>6</sub> ) <sub>2</sub> | 30 mol% | none               | (19%)              |

(a) Reaction conditions: phenanthrene **1b** (0.2 mmol), dimethyldibenzosilole **2a** (1.5 equiv), Pd catalyst ( $x$  mol%), silver salt (10 mol%), *o*-chloranil (2.0 equiv), 1,2-dichloroethane (2 mL), 80 °C, 2 h. (b) Isolated yield. The numbers in the parentheses are GC yield calculated using *n*-dodecane as an internal standard.



**Supplementary Table 3.** Amount of dibenzosilole and *o*-chloranil <sup>a</sup>

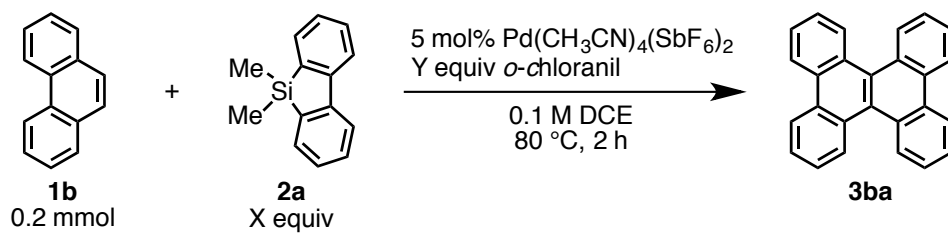

| entry | X equiv | Y equiv | GC yield <sup>b</sup> |
|-------|---------|---------|-----------------------|
| 1     | 1.0     | 2.0     | 18%                   |
| 2     | 1.25    | 2.0     | 25%                   |
| 3     | 1.5     | 2.0     | 48% <sup>c</sup>      |
| 4     | 2.0     | 2.0     | 38%                   |
| 5     | 2.5     | 2.0     | 44%                   |
| 6     | 1.5     | 1.0     | 21%                   |
| 7     | 1.5     | 1.5     | 27%                   |
| 8     | 1.5     | 3.0     | 39%                   |

(a) Reaction conditions: phenanthrene **1b** (0.2 mmol), dimethyldibenzosilole **2a** (X equiv), Pd(CH<sub>3</sub>CN)<sub>4</sub>(SbF<sub>6</sub>)<sub>2</sub> (5 mol%), *o*-chloranil (Y equiv), 1,2-dichloroethane (2 mL), 80 °C, 2 h. (b) GC yield was calculated using *n*-dodecane as an internal standard. (c) Isolated yield.

**Supplementary Table 4.** Effect of solvent, concentration and reaction temperature <sup>a</sup>

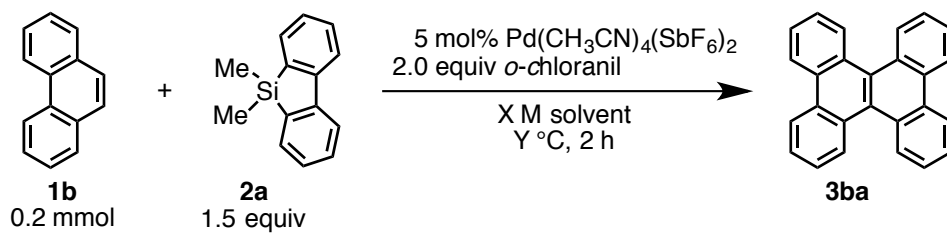

| entry | solvent                                                 | X (M) | Y      | GC yield <sup>b</sup> |
|-------|---------------------------------------------------------|-------|--------|-----------------------|
| 1     | DCE                                                     | 0.1   | 80 °C  | 48% <sup>c</sup>      |
| 2     | <i>o</i> -Cl <sub>2</sub> C <sub>6</sub> H <sub>4</sub> | 0.1   | 80 °C  | 23%                   |
| 3     | PhCl                                                    | 0.1   | 80 °C  | 28%                   |
| 4     | PhCF <sub>3</sub>                                       | 0.1   | 80 °C  | 41%                   |
| 5     | PhF                                                     | 0.1   | 80 °C  | 31%                   |
| 6     | C <sub>6</sub> F <sub>6</sub>                           | 0.1   | 80 °C  | 3%                    |
| 7     | toluene                                                 | 0.1   | 80 °C  | 23%                   |
| 8     | DCE                                                     | 0.2   | 80 °C  | 38%                   |
| 9     | DCE                                                     | 0.05  | 80 °C  | 40%                   |
| 10    | DCE                                                     | 0.025 | 80 °C  | 40%                   |
| 11    | DCE                                                     | 0.02  | 80 °C  | 35%                   |
| 12    | DCE                                                     | 0.1   | 140 °C | 40%                   |
| 13    | DCE                                                     | 0.1   | 120 °C | 38%                   |
| 14    | DCE                                                     | 0.1   | 100 °C | 47%                   |
| 15    | DCE                                                     | 0.1   | 60 °C  | 37%                   |
| 16    | DCE                                                     | 0.1   | 40 °C  | 12%                   |
| 17    | DCE                                                     | 0.1   | rt     | 5%                    |

(a) Reaction conditions: phenanthrene **1b** (0.2 mmol), dimethyldibenzosilole **2a** (1.5 equiv), Pd(CH<sub>3</sub>CN)<sub>4</sub>(SbF<sub>6</sub>)<sub>2</sub> (5 mol%), *o*-chloranil (2.0 equiv), solvent (X M), Y °C, 2 h. (b) GC yield was calculated using *n*-dodecane as an internal standard. (c) Isolated yield.

## Supplementary Methods

### 1. General

Unless otherwise noted, all materials including dry solvents were obtained from commercial suppliers and used without further purification. PdCl<sub>2</sub> was purchased from Wako. AgSbF<sub>6</sub> was purchased from Aldrich. *o*-Chloranil was purchased from TCI and recrystallized from benzene before use. Unless otherwise noted, all reactions were performed with dry solvents under an atmosphere of nitrogen or argon in oven-dried glassware with standard vacuum-line techniques. All work-up and purification procedures were carried out with reagent-grade solvents in air

Analytical thin-layer chromatography (TLC) was performed using E. Merck silica gel 60 F<sub>254</sub> precoated plates (0.25 mm). Preparative thin-layer chromatography (PTLC) was performed using Wako-gel<sup>®</sup> B5-F silica coated plates (0.75 mm) prepared in our laboratory. Preparative gel permeation chromatography (GPC) was performed with a JAI LC-9204 instrument equipped with JAIGEL-1H/JAIGEL-2H columns using chloroform as an eluent. Gas chromatography (GC) analysis was conducted on a Shimadzu GC-2010 instrument equipped with a HP-5 column (30 m × 0.25 mm, Hewlett-Packard). The developed chromatogram was analyzed by UV lamp (254 nm and 365 nm). High-resolution mass spectra (HRMS) were obtained from a JMS-T100TD instrument (DART), Bruker Daltonics Ultraflex III TOF/TOF (MALDI-TOF-MS) and Thermo Fisher Scientific Exactive (ESI, APCI). Nuclear magnetic resonance (NMR) spectra were recorded on a JEOL ECS-600 (<sup>1</sup>H 600 MHz, <sup>13</sup>C 150 MHz, <sup>19</sup>F 565 MHz) spectrometer and a JEOL ECA 600II with Ultra COOL<sup>™</sup> probe (<sup>1</sup>H 600 MHz, <sup>13</sup>C 150 MHz). Chemical shifts for <sup>1</sup>H NMR are expressed in parts per million (ppm) relative to tetramethylsilane (d 0.00 ppm). Chemical shifts for <sup>13</sup>C NMR are expressed in ppm relative to CDCl<sub>3</sub> (d 77.0 ppm). Chemical shifts for <sup>19</sup>F NMR are expressed in parts per million (ppm) relative to hexafluorobenzene (d -162.00 ppm) as an external standard. Data are reported as follows: chemical shift, multiplicity (s = singlet, d = doublet, dd = doublet of doublets, t = triplet, q = quartet, m = multiplet, br = broad signal), coupling constant (Hz), and integration.

## 2. Preparation of Substrates

### 2-1. Preparation of Pd(CH<sub>3</sub>CN)<sub>4</sub>(SbF<sub>6</sub>)<sub>2</sub>

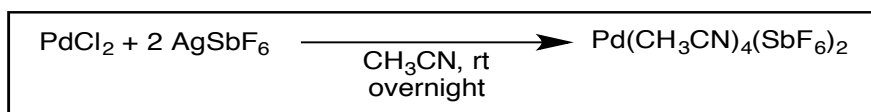

To a suspension of PdCl<sub>2</sub> (177 mg, 1.0 mmol) in CH<sub>3</sub>CN (10 mL) was added AgSbF<sub>6</sub> (687 mg, 2.0 mmol), and the resultant mixture was stirred at room temperature overnight. The reaction mixture was filtrated, then Et<sub>2</sub>O was added into the filtrate to recrystallize Pd(CH<sub>3</sub>CN)<sub>4</sub>(SbF<sub>6</sub>)<sub>2</sub>. The complex was collected by filtration (710 mg, 96%).

### 2-2. Preparation of 2,7-di-*tert*-butylphenanthrene (1a)

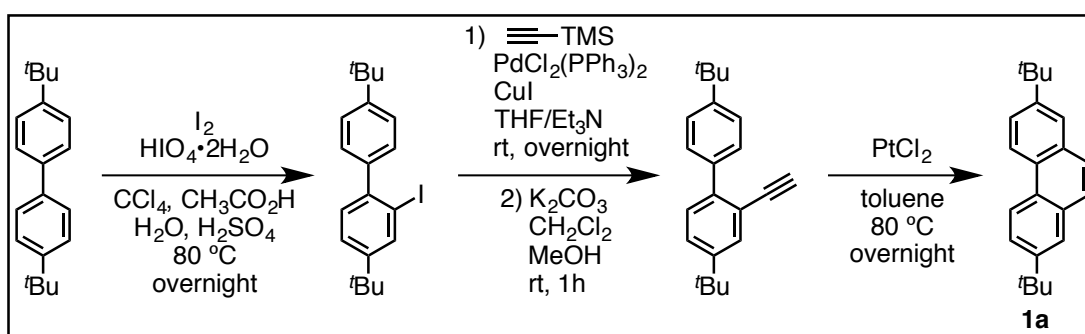

#### Synthesis of 4,4'-di-*tert*-butyl-2-ethynyl-1,1'-biphenyl<sup>1</sup>

To a solution of 4,4'-di-*tert*-butylbiphenyl (13.3 g 50 mmol) in CCl<sub>4</sub>/CH<sub>3</sub>CO<sub>2</sub>H/H<sub>2</sub>O/H<sub>2</sub>SO<sub>4</sub> (20 mL/25 mL/5 mL/1 mL) were added iodine (12.7 g, 50 mmol) and HIO<sub>4</sub>·2H<sub>2</sub>O (5.7 g, 25 mmol), and the resulting reaction mixture was stirred at 80 °C overnight. After cooled to room temperature, sat. NaHCO<sub>3</sub> aq. was added to the reaction mixture and it was extracted with CH<sub>2</sub>Cl<sub>2</sub>. Combined organic layer was dried over Na<sub>2</sub>SO<sub>4</sub>, filtrated and concentrated under reduced pressure to give 4,4'-di-*tert*-butyl-2-iodo-1,1'-biphenyl. This crude product was used for the next step without purification.

A solution of 4,4'-di-*tert*-butyl-2-iodo-1,1'-biphenyl, trimethylsilylacetylene (7.4 g, 75 mmol), PdCl<sub>2</sub>(PPh<sub>3</sub>)<sub>2</sub> (1.75 g, 2.5 mmol), and CuI (476 mg, 2.5 mmol) in THF/triethylamine (100 mL/100 mL) was stirred at room temperature overnight. 1N HCl aq. was added to the reaction mixture and it was extracted with CH<sub>2</sub>Cl<sub>2</sub>. Combined organic layer was dried over Na<sub>2</sub>SO<sub>4</sub>, filtrated and concentrated under reduced pressure. The crude mixture was dissolved in MeOH/CH<sub>2</sub>Cl<sub>2</sub> (50 mL/50 mL), and K<sub>2</sub>CO<sub>3</sub> (6.9 g, 50 mmol) was added. Resulting suspension was stirred at room temperature for 1 h. Water was added and the organic layer was extracted with CH<sub>2</sub>Cl<sub>2</sub>. The combined organic phases were dried over MgSO<sub>4</sub>, filtrated and concentrated under reduced pressure. Obtained crude 4,4'-di-*tert*-butyl-2-ethynyl-1,1'-biphenyl was used for the next step without purification.

## PtCl<sub>2</sub>-catalyzed synthesis of 2,7-di-*tert*-butylphenanthrene (**1a**)<sup>2</sup>

A solution of 4,4'-di-*tert*-butyl-2-ethynyl-1,1'-biphenyl and PtCl<sub>2</sub> (664 mg 2.5 mmol) in toluene (100 mL) was stirred at 80 °C overnight. The solvent was removed under reduced pressure. The residue was purified by silica gel column chromatography (eluent: hexane), and further purified by recrystallization from CH<sub>2</sub>Cl<sub>2</sub>/MeOH to obtain 2,7-di-*tert*-butylphenanthrene (**1a**) (5.0 g, 17 mmol, total 34% yield in 4 steps). <sup>1</sup>H NMR (600 MHz, CDCl<sub>3</sub>) δ 8.57 (d, *J* = 9.0 Hz, 2H), 7.82 (d, *J* = 2.4 Hz, 2H), 7.71 (dd, *J* = 9.0, 2.4 Hz, 2H), 7.70 (s, 2H), 1.45 (s, 18H); <sup>13</sup>C NMR (150 MHz, CDCl<sub>3</sub>) δ 148.9, 131.7, 128.1, 127.0, 124.8, 124.1, 122.3, 34.7, 31.4. HRMS (DRAT, ESI<sup>+</sup>) *m/z* calcd for C<sub>22</sub>H<sub>27</sub> [M+H]<sup>+</sup>: 291.2113, found: 291.2112.

## 2-3. Preparation of silicon-bridged aromatics

Silicon-bridged aromatics **2a**<sup>3</sup>, **2b**<sup>4</sup>, **2c**<sup>4</sup>, **2d**<sup>4</sup>, **2e**<sup>4</sup>, **2f**<sup>4</sup>, **2g**<sup>3</sup>, **2h**<sup>4</sup>, **2i**<sup>4</sup>, **2j**<sup>4</sup>, **2k**<sup>4</sup>, **2l**<sup>4</sup>, **2m**<sup>4</sup>, **4**<sup>4</sup>, and **10**<sup>5</sup> were prepared from the corresponding biphenyls according to reported method.

## Synthesis of 5,5-dimethyl-3,7-bis(4,4,5,5-tetramethyl-1,3,2-dioxaborolan-2-yl)-5*H*-dibenzo[*b,d*]siloles (**2f**)<sup>6</sup>

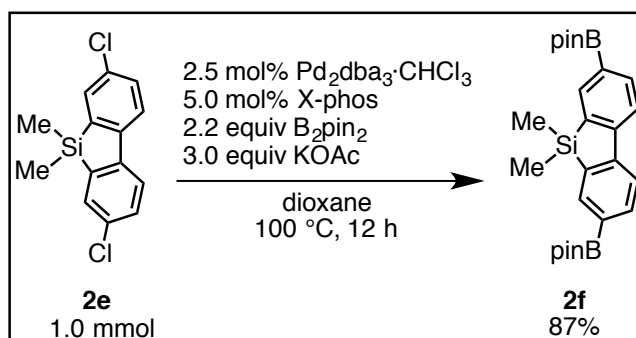

A solution of **2e** (279 mg, 1.0 mmol), bis(pinacolato)diboron (559 mg, 2.2 mmol), Pd<sub>2</sub>(dba)<sub>3</sub>·CHCl<sub>3</sub> (tris(dibenzylideneacetone)dipalladium·CHCl<sub>3</sub>, 26 mg, 0.025 mmol), XPhos (2-dicyclohexylphosphino-2',4',6'-triisopropylbiphenyl, 24 mg, 0.05 mmol), potassium acetate (294 mg, 3 mmol) in dry 1,4-dioxane (10 mL) was heated with stirring at 80 °C for 16 h. After the reaction mixture was cooled down to room temperature, the reaction was quenched with water. Then the mixture was extracted with EtOAc. The combined organic phases were dried over Na<sub>2</sub>SO<sub>4</sub>, filtered and concentrated under reduced pressure. The crude product was passed through a short pad of silica gel (eluent: EtOAc). After the organic solvent was removed under reduced pressure, the residue was purified by recrystallization from EtOH to yield **2f** (400 mg, 87%) as a white solid.

<sup>1</sup>H NMR (600 MHz, CDCl<sub>3</sub>) δ 8.10 (s, 2H), 7.90 (dd, *J* = 7.9, 1.2 Hz, 2H), 7.86 (d, *J* = 7.2 Hz, 2H), 1.37 (s, 24H), 0.42 (s, 6H); <sup>13</sup>C NMR (150 MHz, CDCl<sub>3</sub>) δ 150.3, 139.2, 138.6, 136.9, 127.9 (br), 120.5, 83.7, 24.8, -3.2. HRMS (ESI<sup>+</sup>) *m/z* calcd for C<sub>26</sub>H<sub>37</sub>O<sub>4</sub>B<sub>2</sub>Si [M+H]<sup>+</sup>: 463.2642, found: 463.2626.

### 3. APEX Reaction of PAHs with Siloles

#### 3-1. General procedure

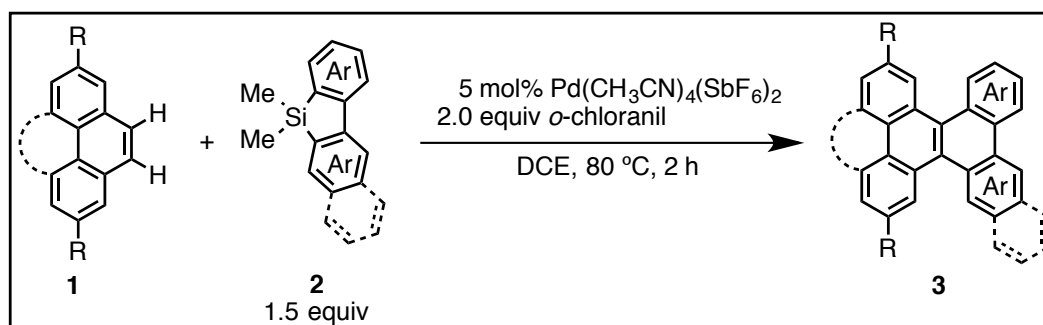

A solution of phenanthrene derivative **1** (0.20 mmol, 1.0 equiv), silicon-bridged aromatics **2** (0.30 mmol, 1.5 equiv), Pd(CH<sub>3</sub>CN)<sub>4</sub>(SbF<sub>6</sub>)<sub>2</sub> (7.4 mg, 10 mmol, 5 mol%), and *o*-chloranil (98 mg, 0.40 mmol, 2.0 equiv) in DCE (2 mL) was stirred at 80 °C in the screw cap glass tube. After 2 hours, the reaction mixture was cooled to room temperature, and then passed through a short pad of silica gel (eluent: CH<sub>2</sub>Cl<sub>2</sub>). After the organic solvent was removed under reduced pressure, the residue was purified by PTLC or silica gel column chromatography to yield  $\pi$ -extended PAH.

#### 3,14-Di-*tert*-butyldibenzo[*g,p*]chrysene (**3aa**)

PTLC: hexane only, Yield: 77.0 mg, 88%.

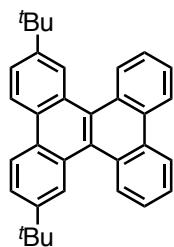

<sup>1</sup>H NMR (600 MHz, CDCl<sub>3</sub>)  $\delta$  8.693 (dd,  $J = 10.4, 1.2$  Hz, 4H), 8.687 (s, 2H), 8.58 (d,  $J = 9.0$  Hz, 2H), 7.70 (dd,  $J = 8.4, 1.8$  Hz, 2H), 7.65 (t,  $J = 6.9$  Hz, 2H), 7.62 (t,  $J = 7.5$  Hz, 2H), 1.44 (s, 18H); <sup>13</sup>C NMR (150 MHz, CDCl<sub>3</sub>)  $\delta$  148.8, 130.8, 129.5, 128.7, 128.6, 127.9, 126.40, 126.37, 125.2, 124.4, 123.6, 123.1, 35.0, 31.4. One aromatic carbon signal can be overlapped. HRMS (DART, ESI<sup>+</sup>)  $m/z$  calcd for C<sub>34</sub>H<sub>33</sub> [M+H]<sup>+</sup>: 441.2582, found: 441.2579.

#### Dibenzo[*g,p*]chrysene (**3ba**)<sup>7</sup> CAS:191-68-4

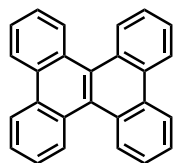

PTLC: hexane only, Yield: 31.3 mg, 48%

#### 6,11-Di-*tert*-butyl-3-(trifluoromethyl)dibenzo[*g,p*]chrysene (**3ab**)

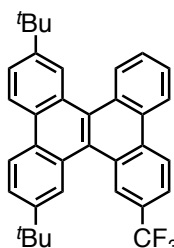

PTLC: hexane only, Yield: 90.5 mg, 89%.

<sup>1</sup>H NMR (600 MHz, CDCl<sub>3</sub>)  $\delta$  9.03 (s, 1H), 8.78 (d,  $J = 8.4$  Hz, 1H), 8.75–8.69 (m, 2H), 8.68 (d,  $J = 1.8$  Hz, 1H), 8.62–8.57 (m, 3H), 7.86 (dd,  $J = 8.7, 1.5$  Hz, 1H), 7.74 (dd,  $J = 8.4, 1.8$  Hz, 1H), 7.73 (dd,  $J = 8.7, 2.1$  Hz, 1H), 7.71–7.67 (m, 2H), 1.442 (s,

9H), 1.440 (s, 9H);  $^{13}\text{C}$  NMR (150 MHz,  $\text{CDCl}_3$ ) d 149.5, 149.1, 132.8, 130.2, 129.9, 129.0, 128.9, 128.8 (2C), 128.7, 128.4, 128.20 ( $^2J_{\text{C-F}} = 32.1$  Hz), 128.17, 127.4, 127.3, 126.7, 126.3 ( $^3J_{\text{C-F}} = 4.3$  Hz), 125.2, 125.02, 124.96, 124.8, 124.6 ( $^1J_{\text{C-F}} = 271$  Hz), 124.3, 124.0, 123.25, 123.22, 122.2 ( $^3J_{\text{C-F}} = 4.4$  Hz), 35.04, 35.02, 31.4, 31.3;  $^{19}\text{F}$  NMR (565 MHz,  $\text{CDCl}_3$ ) d -62.25 (s). HRMS (DART,  $\text{ESI}^+$ )  $m/z$  calcd for  $\text{C}_{35}\text{H}_{32}\text{F}_3$   $[\text{M}+\text{H}]^+$ : 509.2456, found: 509.2456.

### 6,11-Di-*tert*-butyl-3-fluorodibenzo[*g,p*]chrysene (3ac)

PTLC: hexane only, Yield: 84.9 mg, 93%.

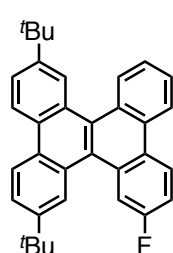

$^1\text{H}$  NMR (600 MHz,  $\text{CDCl}_3$ ) d 8.70–8.65 (m, 3H), 8.65 (d,  $J = 2.4$  Hz, 1H), 8.63 (dd,  $J = 8.4, 1.2$  Hz, 1H), 8.60 (dd,  $J = 9.0, 1.2$  Hz, 2H), 8.38 (dd,  $J = 11.7, 2.7$  Hz, 1H), 7.74 (dt,  $J = 8.4, 2.3$  Hz, 2H), 7.67 (td,  $J = 7.8, 1.2$  Hz, 1H), 7.62 (td,  $J = 7.5, 1.2$  Hz, 1H), 7.40 (ddd,  $J = 9.0, 7.8, 3.0$  Hz, 1H), 1.46 (s, 9H), 1.45 (s, 9H);  $^{13}\text{C}$  NMR (150 MHz,  $\text{CDCl}_3$ ) d 161.5 ( $^1J_{\text{C-F}} = 242.9$  Hz), 149.2, 149.0, 131.0 ( $^3J_{\text{C-F}} = 8.6$  Hz), 130.5, 129.1, 129.0, 128.9, 128.7, 128.6, 128.5 (2C), 127.3, 127.2 ( $^4J_{\text{C-F}} = 2.8$  Hz), 126.7, 126.2, 125.8 ( $^3J_{\text{C-F}} = 8.6$  Hz), 125.4, 124.8, 124.7, 124.5, 123.5, 123.2, 123.1, 114.7 ( $^2J_{\text{C-F}} = 23.1$  Hz), 113.7 ( $^2J_{\text{C-F}} = 23.0$  Hz), 35.0, 31.4;  $^{19}\text{F}$  NMR (565 MHz,  $\text{CDCl}_3$ ) d -114.87 (t,  $J = 13.0$  Hz). HRMS (DART,  $\text{ESI}^+$ )  $m/z$  calcd for  $\text{C}_{34}\text{H}_{32}\text{F}$   $[\text{M}+\text{H}]^+$ : 459.2488, found: 459.2484.

### 6,11-Di-*tert*-butyl-3-chlorodibenzo[*g,p*]chrysene (3ad)

PTLC: hexane only, Yield: 84.0 mg, 88%.

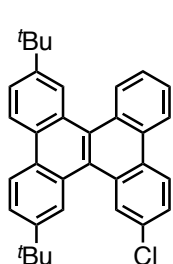

$^1\text{H}$  NMR (600 MHz,  $\text{CDCl}_3$ ) d 8.76 (s, 1H), 8.74–8.70 (m, 2H), 8.68–8.65 (m, 2H), 8.64 (d,  $J = 8.4$  Hz, 1H), 8.61 (d,  $J = 8.4$  Hz, 2H), 7.75 (dt,  $J = 9.0, 2.1$  Hz, 2H), 7.71–7.65 (m, 2H), 7.63 (dd,  $J = 8.7, 2.1$  Hz, 1H), 1.50 (s, 9H), 1.48 (s, 9H);  $^{13}\text{C}$  NMR (150 MHz,  $\text{CDCl}_3$ ) d 149.2, 149.0, 132.4, 130.6, 130.2, 129.5, 129.0, 128.9 (2C), 128.7, 128.6, 128.5, 128.3, 128.1, 126.8, 126.7, 126.6, 126.5, 125.3, 125.2, 124.9, 124.8, 124.6, 123.5, 123.2 (2C), 35.04, 35.02, 31.42, 31.39. HRMS (DART,  $\text{ESI}^+$ )  $m/z$  calcd for  $\text{C}_{34}\text{H}_{32}\text{Cl}$   $[\text{M}+\text{H}]^+$ : 475.2193, found: 475.2179.

### 3,14-Di-*tert*-butyl-6,11-dichlorodibenzo[*g,p*]chrysene (3ae)

Silica gel column chromatography: hexane/EtOAc = 10:1 to 5:1, Yield: 71.4 mg, 70%.

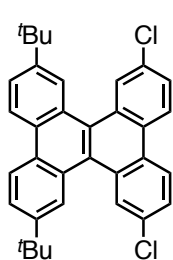

$^1\text{H}$  NMR (600 MHz,  $\text{CDCl}_3$ ) d 8.72 (d,  $J = 1.8$  Hz, 2H), 8.64 (d,  $J = 1.8$  Hz, 2H), 8.62 (d,  $J = 9.0$  Hz, 2H), 8.58 (d,  $J = 9.0$  Hz, 2H), 7.77 (dd,  $J = 9.0, 1.8$  Hz, 2H), 7.63 (dd,  $J = 9.0, 2.4$  Hz, 2H), 1.48 (s, 18H);  $^{13}\text{C}$  NMR (150 MHz,  $\text{CDCl}_3$ ) d 149.3, 132.7, 130.5, 128.7, 128.5, 128.3, 128.1, 127.7, 126.8, 125.0 (2C), 124.9, 123.2, 35.0, 31.4. HRMS (DART,  $\text{ESI}^+$ )  $m/z$  calcd for  $\text{C}_{34}\text{H}_{31}\text{Cl}_2$   $[\text{M}+\text{H}]^+$ : 509.1803, found: 509.1805.

**2,2'-(6,11-Di-*tert*-butyldibenzo[*g,p*]chrysene-3,14-diyl)bis(4,4,5,5-tetramethyl-1,3,2-dioxaborolan e) (3af)**

Silica gel column chromatography: hexane/EtOAc = 10:1 to 6:1, Yield: 34.1 mg, 25%.

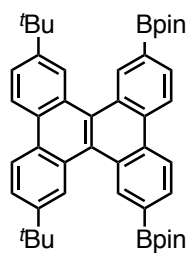

$^1\text{H NMR}$  (600 MHz,  $\text{CDCl}_3$ ) d 9.31 (s, 2H), 8.78 (d,  $J = 1.8$  Hz, 2H), 8.74 (d,  $J = 8.0$  Hz, 2H), 8.61 (d,  $J = 9.0$  Hz, 2H), 8.05 (dd,  $J = 7.8, 0.6$  Hz, 2H), 7.73 (dd,  $J = 8.4, 1.8$  Hz, 2H), 1.49 (s, 18H), 1.37 (s, 24H);  $^{13}\text{C NMR}$  (150 MHz,  $\text{CDCl}_3$ ) d 148.7, 136.9, 132.6, 131.4, 129.1, 128.7, 128.6, 127.9, 126.6 (br), 126.1, 124.2, 122.9, 122.8, 83.9, 35.1, 31.5, 25.0. HRMS (ESI $^+$ )  $m/z$  calcd for  $\text{C}_{46}\text{H}_{55}\text{O}_4\text{B}_2$  [M+H] $^+$ : 693.4281, found: 693.4282.

**3,6,11,14-Tetra-*tert*-butyldibenzo[*g,p*]chrysene (3ag)**

PTLC: hexane only, Yield: 69.0 mg, 63%.

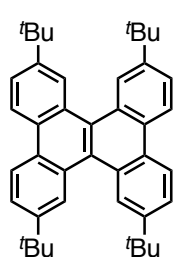

$^1\text{H NMR}$  (600 MHz,  $\text{CDCl}_3$ ) d 8.65 (d,  $J = 1.8$  Hz, 4H), 8.59 (d,  $J = 8.4$  Hz, 4H), 7.71 (dd,  $J = 8.7, 1.5$  Hz, 4H), 1.44 (s, 36H);  $^{13}\text{C NMR}$  (150 MHz,  $\text{CDCl}_3$ ) d 148.8, 129.1, 128.5, 128.4, 124.9, 124.3, 123.2, 35.1, 31.6. HRMS (DART, ESI $^+$ )  $m/z$  calcd for  $\text{C}_{42}\text{H}_{49}$  [M+H] $^+$ : 553.3834, found: 553.3854.

**6,11-Di-*tert*-butyl-3-methoxydibenzo[*g,p*]chrysene (3ah)**

PTLC: hexane/ $\text{CH}_2\text{Cl}_2$  = 4:1, Yield: 69.6 mg, 74%.

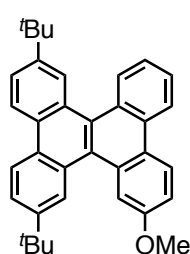

$^1\text{H NMR}$  (600 MHz,  $\text{CDCl}_3$ ) d 8.77 (d,  $J = 1.2$  Hz, 1H), 8.69 (d,  $J = 1.2$  Hz, 1H), 8.66 (d,  $J = 8.4$  Hz, 1H), 8.63–8.58 (m, 4H), 8.17 (d,  $J = 3.0$  Hz, 1H), 7.75–7.71 (m, 2H), 7.65 (t,  $J = 7.5$  Hz, 1H), 7.57 (t,  $J = 7.5$  Hz, 1H), 7.30 (dd,  $J = 9.0, 2.4$  Hz, 1H), 3.94 (s, 3H) 1.46 (s, 9H), 1.45 (s, 9H);  $^{13}\text{C NMR}$  (150 MHz,  $\text{CDCl}_3$ ) d 158.3, 148.9, 148.8, 130.9, 130.7, 128.9, 128.8 (3C), 128.7, 128.6, 128.5, 127.7, 126.5, 125.5, 125.4, 125.2, 124.9, 124.50, 124.48, 124.39, 123.3, 123.11, 123.06, 116.4, 109.9, 55.4, 35.1, 35.0, 31.6, 31.4. HRMS (DART, ESI $^+$ )  $m/z$  calcd for  $\text{C}_{35}\text{H}_{35}\text{O}$  [M+H] $^+$ : 471.2688, found: 471.2681.

**6,11-Di-*tert*-butyl-1-methoxydibenzo[*g,p*]chrysene (3ai)**

PTLC: hexane only, Yield: 53.4 mg, 57%.

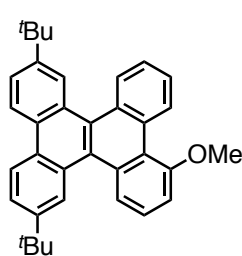

$^1\text{H NMR}$  (600 MHz,  $\text{CDCl}_3$ ) d 9.43–9.39 (m, 1H), 8.67–8.64 (m, 2H), 8.63–8.60 (m, 1H), 8.55 (dd,  $J = 9.0, 1.2$  Hz, 2H), 8.29 (d,  $J = 8.4$  Hz, 1H), 7.69 (t,  $J = 7.8$  Hz, 2H), 7.60–7.56 (m, 2H), 7.53 (t,  $J = 8.1$  Hz, 1H), 7.15 (d,  $J = 7.8$  Hz, 1H), 4.10 (s, 3H), 1.43 (s, 18H);  $^{13}\text{C NMR}$  (150 MHz,  $\text{CDCl}_3$ ) d 157.8, 148.8, 148.6, 132.0, 130.3, 129.2, 128.8, 128.75, 128.69 (2C), 128.6,



128.4, 127.9 (2C), 126.7, 126.2, 125.5, 125.2 (2C), 124.4, 124.2, 123.04, 123.02, 121.2, 120.7, 108.5, 55.9, 34.9 (2C), 31.4 (2C). HRMS (DART, ESI<sup>+</sup>) *m/z* calcd for C<sub>35</sub>H<sub>35</sub>O [M+H]<sup>+</sup>: 471.2688, found: 471.2679.

### 3,16-Di-*tert*-butyltribenzo[*a,c,f*]tetraphene (3aj)

PTLC: hexane only, Yield: 46.4 mg, 47%.

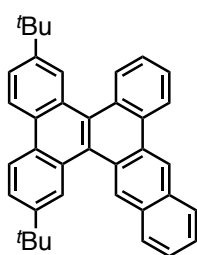

<sup>1</sup>H NMR (600 MHz, CDCl<sub>3</sub>) δ 9.15 (s, 1H), 9.12 (s, 1H), 8.89 (s, 1H), 8.80 (d, *J* = 7.8 Hz, 1H), 8.69 (s, 1H), 8.63–8.57 (m, 3H), 8.12 (d, *J* = 7.8 Hz, 1H), 7.97 (d, *J* = 8.4 Hz, 1H), 7.72 (dd, *J* = 8.4, 1.8 Hz, 1H), 7.70 (dd, *J* = 8.7, 1.5 Hz, 1H), 7.67 (t, *J* = 7.5 Hz, 1H), 7.62 (t, *J* = 7.5 Hz, 1H), 7.58–7.50 (m, 2H), 1.45 (s, 9H), 1.44 (s, 9H); <sup>13</sup>C NMR (150 MHz, CDCl<sub>3</sub>) δ 148.9, 148.8, 132.0, 131.6, 131.3, 130.2, 129.9, 128.9, 128.8, 128.7, 128.6, 128.42, 128.39, 128.2, 128.1, 128.0, 127.9 (2C), 126.8, 126.7, 126.0, 125.9, 125.1, 124.9, 124.5, 124.4, 124.3, 123.1, 122.2, 35.0 (2C), 31.44, 31.42. One aromatic carbon signal can be overlapped. HRMS (DART, ESI<sup>+</sup>) *m/z* calcd for C<sub>38</sub>H<sub>35</sub> [M+H]<sup>+</sup>: 491.2739, found: 491.2722.

### 4*H*-Benzo[*p*]indeno[7,1,2-*ghi*]chrysene (3ca)

A solution of 4*H*-Cyclopenta[*def*]phenanthrene **1c** (19 mg, 0.10 mmol, 1.0 equiv), **2a** (32 mg, 0.15 mmol, 1.5 equiv), Pd(CH<sub>3</sub>CN)<sub>4</sub>(SbF<sub>6</sub>)<sub>2</sub> (3.7 mg, 5 mmol, 5 mol%), and *o*-chloranil (49 mg, 0.20 mmol, 2.0 equiv) in DCE (1 mL) was stirred at 80 °C in the screw cap glass tube. After 2 hours, the reaction mixture was cooled to room temperature, and then passed through a short pad of silica gel (eluent: CH<sub>2</sub>Cl<sub>2</sub>). After the organic solvent was removed under reduced pressure, the residue was purified by silica gel column chromatography (eluent: hexane/CH<sub>2</sub>Cl<sub>2</sub> = 7:1) to give **3ca** (17.3 mg, 51%).

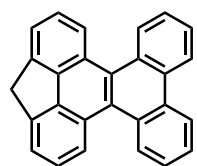

<sup>1</sup>H NMR (600 MHz, CDCl<sub>3</sub>) δ 9.10 (dd, *J* = 7.8, 1.2 Hz, 2H), 8.79 (dd, *J* = 7.8, 1.2 Hz, 2H), 8.72 (d, *J* = 7.8 Hz, 2H), 7.81–7.76 (m, 4H), 7.75–7.68 (m, 4H), 4.45 (s, 2H); <sup>13</sup>C NMR (150 MHz, CDCl<sub>3</sub>) δ 141.6, 138.4, 130.8, 130.4, 128.5, 128.2, 127.1, 126.68, 126.66, 125.7, 124.7, 123.5, 121.6, 37.4. HRMS (DART, ESI<sup>+</sup>) *m/z* calcd for C<sub>27</sub>H<sub>17</sub> [M+H]<sup>+</sup>: 341.1330, found: 341.1331.

### 3-2. 2:1 APEX reaction of **1a** with **4**.

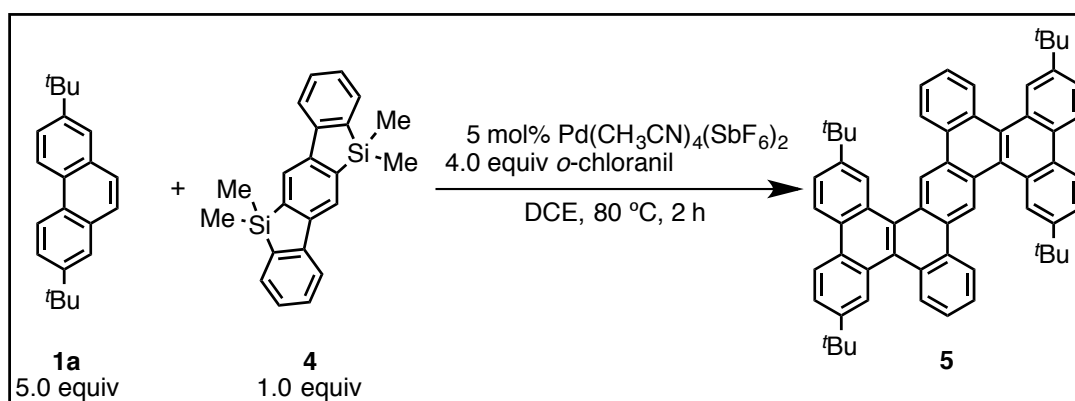

A solution of 2,7-di-*tert*-butylphenanthrene (**1a**) (145 mg, 0.5 mmol, 5.0 equiv), **4** (34.3 mg, 0.1 mmol, 1.0 equiv), Pd(CH<sub>3</sub>CN)<sub>4</sub>(SbF<sub>6</sub>)<sub>2</sub> (7.4 mg, 10 mmol, 5 mol%), and *o*-chloranil (98 mg, 0.4 mmol, 4.0 equiv) in DCE (2 mL) was stirred at 80 °C for 2 h in the screw cap glass tube. After the reaction mixture was cooled to room temperature, the mixture was passed through a short pad of silica gel (eluent: CH<sub>2</sub>Cl<sub>2</sub>). After the organic solvent was removed under reduced pressure, the residue was purified by silica gel column chromatography (eluent: hexane/CH<sub>2</sub>Cl<sub>2</sub> = 19:1) to give **5** (55.3 mg, 69% yield).

<sup>1</sup>H NMR (600 MHz, CDCl<sub>3</sub>/CS<sub>2</sub>) δ 9.90 (s, 2H), 9.07 (s, 2H), 8.85 (d, *J* = 7.8 Hz, 2H), 8.72–8.68 (m, 4H), 8.66 (d, *J* = 8.4 Hz, 2H), 8.62 (d, *J* = 9.0 Hz, 2H), 7.81 (d, *J* = 9.0 Hz, 2H), 7.71 (d, *J* = 9.0 Hz, 2H), 7.66–7.61 (m, 4H), 1.56 (s, 18H), 1.44 (s, 18H); <sup>13</sup>C NMR (150 MHz, CDCl<sub>3</sub>/CS<sub>2</sub>) δ 149.1, 148.7, 131.1, 130.0, 129.4, 129.1, 129.0, 128.8, 128.7, 128.6, 128.3, 128.2, 128.0, 126.53, 126.49, 125.1 (2C), 124.6, 124.4, 123.8, 123.7, 123.3, 123.1, 35.0, 34.9, 31.6, 31.4. HRMS (APCI) *m/z* calcd for C<sub>62</sub>H<sub>59</sub> [M+H]<sup>+</sup>: 803.4611, found: 803.4576.

### 3-3. 1:2 APEX reaction of **6** with **2a** (gram-scale synthesis of 10,21-di-*tert*-butylhexabenz[*a,c,fg,j,l,op*]tetracene (**7**))

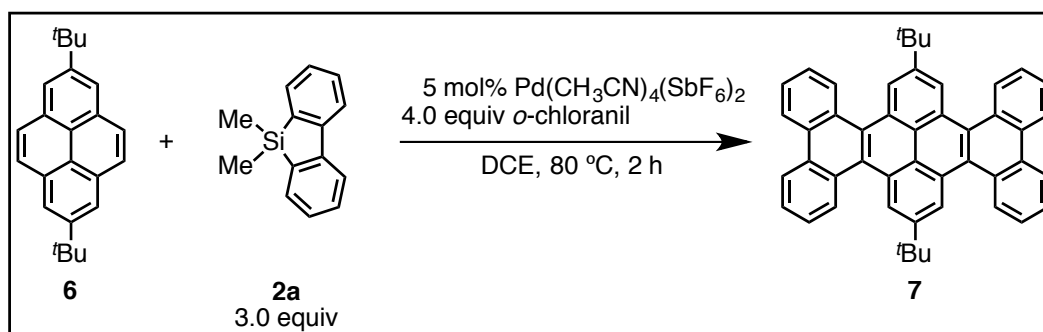

A solution of 2,7-di-*tert*-butylpyrene (**6**, 1.57 g, 5.0 mmol, 1.0 equiv), **2a** (3.15 g, 15 mmol, 3.0 equiv), Pd(CH<sub>3</sub>CN)<sub>4</sub>(SbF<sub>6</sub>)<sub>2</sub> (185.5 mg, 0.25 mmol, 5 mol%), and *o*-chloranil (4.92 g, 20 mmol, 4.0 equiv) in DCE (50 mL) was stirred at 80 °C in the screw cap glass tube. After 8 h, the reaction mixture was cooled to room temperature, and then the organic solvent was removed under reduced pressure.

The residue was purified by silica gel column chromatography (eluent: hexane/CH<sub>2</sub>Cl<sub>2</sub> = 9:1) to give 10,21-di-*tert*-butylhexabenzoc[*a,c,fgj,l,op*]tetracene (**7**) (2.6 g, 83% yield). <sup>1</sup>H NMR (CDCl<sub>3</sub>, 600 MHz) δ 9.05 (s, 4H), 8.90 (d, *J* = 8.2 Hz, 4H), 8.82 (d, *J* = 8.2 Hz, 4H), 7.76 (t, *J* = 8.2 Hz, 4H), 7.70 (t, *J* = 8.2 Hz, 4H), 1.61 (s, 18H); <sup>13</sup>C NMR (CDCl<sub>3</sub>, 100 MHz) δ 147.7, 131.0, 129.9, 128.5, 128.3, 127.9, 126.7, 126.6, 123.8, 123.4, 122.8, 35.7, 31.8. HRMS (DART, ESI<sup>+</sup>) *m/z* calcd for C<sub>48</sub>H<sub>39</sub> [M+H]<sup>+</sup>: 615.3052, found: 615.3067.

### 3-4. Preparation of 7,7'-di-*tert*-butyl-2,2'-bipyrene (**8**).

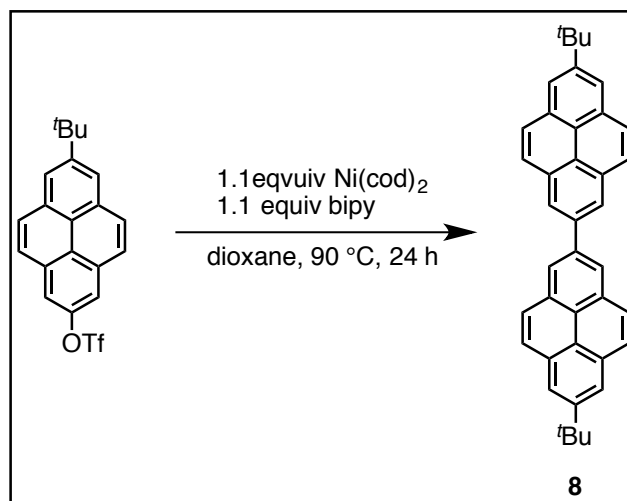

A solution of 7-(*tert*-butyl)pyren-2-yl trifluoromethanesulfonate (81 mg, 0.20 mmol, 1.0 equiv), bis(1,5-cyclooctadiene)nickel (60 mg, 0.22 mmol, 1.1 equiv), and 2,2'-bipyridyl (34 mg, 0.22 mmol) in dry 1,4-dioxane (2 mL) was stirred at 90 °C in 20-mL glass vessel tubes equipped with J. Young<sup>®</sup> O-ring tap containing a magnetic stirring bar. After 14 h, the reaction mixture was cooled to room temperature, passed through a short pad of silica gel (eluent: CH<sub>2</sub>Cl<sub>2</sub>). After cooled down to room temperature, the mixture was concentrated under reduced pressure. The mixture was extracted with CHCl<sub>3</sub>. The combined organic phase was dried over Na<sub>2</sub>SO<sub>4</sub> and concentrated under reduced pressure. The crude product was purified by silica gel column chromatography (eluent: hexane/CH<sub>2</sub>Cl<sub>2</sub> = 6:1) to give **8** (102.6 mg, 99% yield).

<sup>1</sup>H NMR (600 MHz, CDCl<sub>3</sub>) δ 8.64 (s, 4H), 8.26 (s, 4H), 8.18 (d, *J* = 9.0 Hz, 4H), 8.12 (d, *J* = 9.0 Hz, 4H), 1.61 (s, 18H); <sup>13</sup>C NMR (150 MHz, CDCl<sub>3</sub>) δ 149.2, 139.0, 131.6, 131.1, 128.1, 127.5, 124.4, 123.9, 122.9, 122.5, 35.3, 32.0. HRMS (APCI) *m/z* calcd for C<sub>40</sub>H<sub>35</sub> [M+H]<sup>+</sup>: 515.2733, found: 515.2727.

### 3-5. 1:4 APEX reaction of **8** with **2a**.

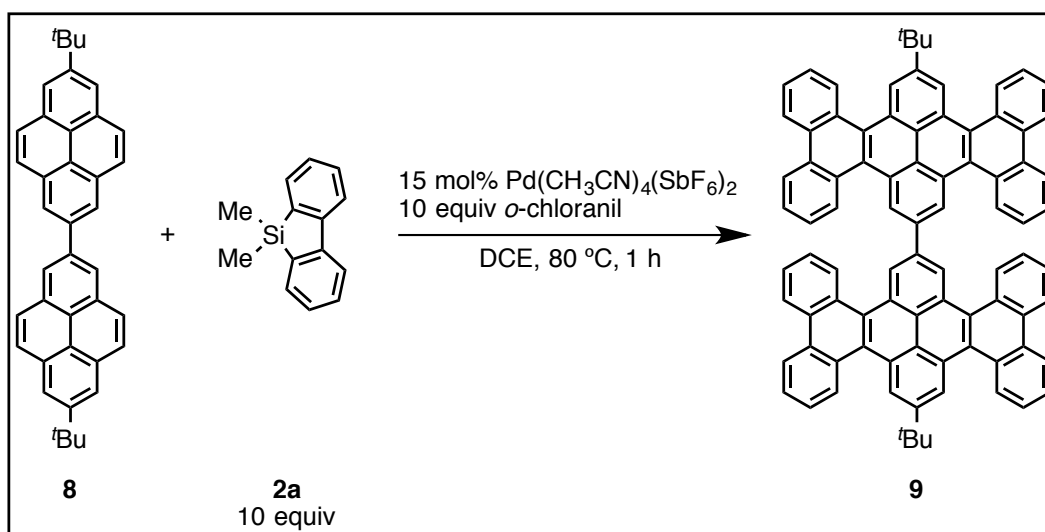

A solution of 7,7'-di-*tert*-butyl-2,2'-bipyrene (**8**) (51 mg, 0.10 mmol, 1.0 equiv), **2a** (210 mg, 1.0 mmol, 10 equiv), Pd(CH<sub>3</sub>CN)<sub>4</sub>(SbF<sub>6</sub>)<sub>2</sub> (11 mg, 0.015 mmol, 15 mol%), and *o*-chloranil (245 mg, 1.0 mmol, 10 equiv) in DCE (4 mL) was stirred at 80 °C in the screw cap glass tube. After 1 h, the reaction mixture was cooled to room temperature, and the residue was subjected to silica gel column chromatography (eluent: hexane/CH<sub>2</sub>Cl<sub>2</sub> = 4:1), and then purified by PTLC (eluent: CHCl<sub>3</sub>) to give 21,21'-di-*tert*-butyl-10,10'-bihexabenzo[*a,c,fg,j,l,op*]tetracene (**9**) (34.3 mg, 31% yield).

<sup>1</sup>H NMR (600 MHz, CDCl<sub>3</sub>) δ 9.65 (s, 4H), 9.11 (s, 4H), 9.08 (d, *J* = 8.4 Hz, 4H), 8.94 (d, *J* = 7.2 Hz, 4H), 8.85 (d, *J* = 7.2 Hz, 8H), 7.80–7.76 (m, 8H), 7.73 (t, *J* = 7.5 Hz, 4H), 7.49 (t, *J* = 7.8 Hz, 4H), 1.64 (s, 18H); <sup>13</sup>C NMR (150 MHz, CDCl<sub>3</sub>) δ 148.3, 137.9, 131.2, 131.0, 129.83, 129.76, 129.0, 128.7, 128.6, 128.4, 128.2, 127.3, 126.9, 126.74, 126.68, 125.2, 123.9, 123.7, 122.7, 35.8, 31.8. HRMS (APCI) *m/z* calcd for C<sub>88</sub>H<sub>59</sub> [M+H]<sup>+</sup>: 1115.4611, found: 1115.4556.

### 3-6. 2:1 APEX reaction of **6** with **10**.

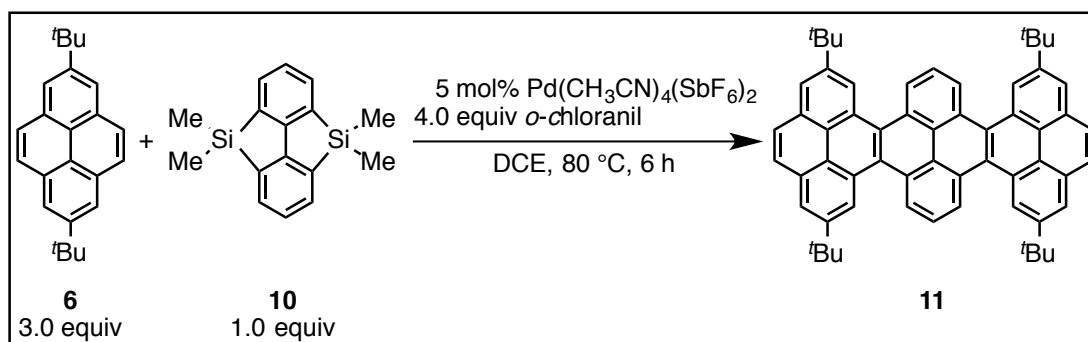

A solution of 2,7-di-*tert*-butylpyrene (**6**) (47 mg, 0.15 mmol, 3.0 equiv), 4,4,8,8-tetramethyl-4,8-dihydro-4,8-disilacyclopenta[*def*]fluorene (**10**) (13 mg, 0.05 mmol, 1.0 equiv), Pd(CH<sub>3</sub>CN)<sub>4</sub>(SbF<sub>6</sub>)<sub>2</sub> (2 mg, 2.5 mmol, 5 mol%), and *o*-chloranil (49 mg, 0.2 mmol, 4.0 equiv) in DCE (2 mL) was stirred at 80 °C in the screw cap glass tube. After 6 h, the reaction mixture was cooled to room temperature, and the residue was subjected to silica gel column chromatography (eluent:

hexane/CH<sub>2</sub>Cl<sub>2</sub> = 4:1), and then purified by preparative recycling gel permeation chromatography (CHCl<sub>3</sub>) to give 2,7,13,18-tetra-*tert*-butylhexabenzo[*de,hi,lm,qr,uv,yz*]hexacene (**11**) (20.6 mg, 53% yield).

<sup>1</sup>H NMR (600 MHz, CDCl<sub>3</sub>) δ 9.31 (d, *J* = 1.8 Hz, 4H), 9.26 (d, *J* = 8.4 Hz, 4H), 8.28 (d, *J* = 1.8 Hz, 4H), 8.18–8.14 (m, 6H), 1.64 (s, 36H); <sup>13</sup>C NMR (150 MHz, CDCl<sub>3</sub>) δ 148.2, 131.0, 129.3, 128.8, 128.4, 127.5, 125.4 (2C), 124.7, 123.9, 123.2, 122.1, 35.5, 31.9. HRMS (APCI) *m/z* calcd for C<sub>60</sub>H<sub>55</sub> [M+H]<sup>+</sup>: 775.4298, found: 775.4269.

### 3-7. 1:2 APEX reaction of **11** with **2a**.

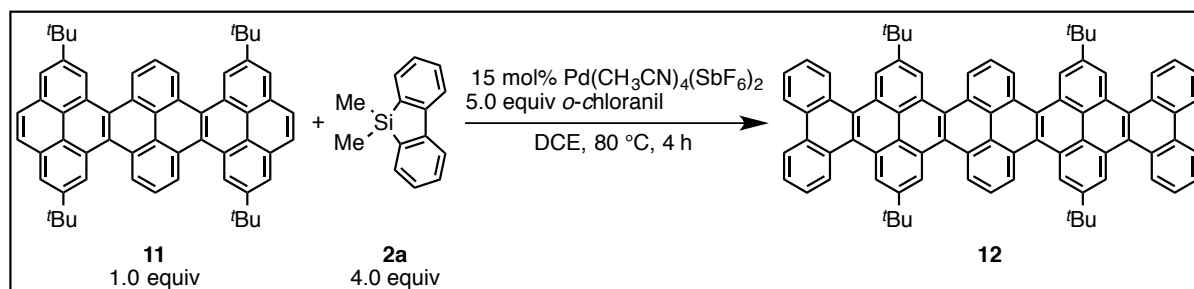

A solution of **11** (18 mg, 22.8 mmol, 1.0 equiv), **2a** (19 mg, 91.3 mmol, 4.0 equiv), Pd(CH<sub>3</sub>CN)<sub>4</sub>(SbF<sub>6</sub>)<sub>2</sub> (2.0 mg, 3.4 mmol, 15 mol%), and *o*-chloranil (28 mg, 114 mmol, 5.0 equiv) in DCE (0.5 mL) was stirred at 80 °C in the screw cap glass tube. After 4 h, the reaction mixture was cooled to room temperature, and the residue was subjected to silica gel column chromatography (eluent: hexane/CH<sub>2</sub>Cl<sub>2</sub> = 6:1), and then purified by preparative recycling gel permeation chromatography (eluent: CHCl<sub>3</sub>) to give 10,16,27,33-tetra-*tert*-butyldecabenzo[*a,a*<sub>1</sub>*b*<sub>1</sub>,*c,ef*<sub>1</sub>,*fg,jk,no,r,t,wx*]octacene (**12**) (4.1 mg, 17% yield).

<sup>1</sup>H NMR (600 MHz, CDCl<sub>3</sub>) δ 9.33 (d, *J* = 1.2 Hz, 4H), 9.28 (d, *J* = 7.8 Hz, 4H), 9.15 (d, *J* = 1.2 Hz, 4H), 8.98 (d, *J* = 7.8 Hz, 4H), 8.85 (d, *J* = 7.2 Hz, 4H), 8.22 (t, *J* = 8.1 Hz, 2H), 7.79 (td, *J* = 7.2, 1.8 Hz, 4H), 7.74 (td, *J* = 7.8, 1.2 Hz, 4H), 1.67 (s, 36H); <sup>13</sup>C NMR (150 MHz, CDCl<sub>3</sub>) δ 147.9, 131.1, 129.9, 129.2, 128.8, 128.6, 128.4 (2C), 128.0, 126.8, 126.7, 125.6, 125.5, 125.0, 123.8, 123.7, 123.25, 123.15, 35.8, 31.9. HRMS (APCI) *m/z* calcd for C<sub>84</sub>H<sub>67</sub> [M+H]<sup>+</sup>: 1075.5237, found: 1075.5209.

#### **4. Photophysical Measurement**

UV/vis absorption spectra of **6**, **11** and **12** in chloroform were recorded on a JASCO UV-570 spectrometer with a resolution of 0.5 nm. Emission spectrum of **6**, **11** and **12** in chloroform were measured with a JASCO FP-6600 spectrometer with a resolution of 0.4 nm upon excitation at 280 nm for **6**, 325 nm for **11** and 345 nm for **12**. Dilute solution in spectral grade chloroform in a 1 cm square quartz cell was used for measurements. For details, see Supplementary Figure 41.

## 5. Computational Study

### Computational methodology

All the calculations were carried out using the Gaussian 09 program package<sup>8</sup>. Geometry optimizations were performed at the density functional theory (DFT) level using the Becke's three-parameter hybrid functional<sup>9</sup>, PW91 non-local correlation functional<sup>10</sup> (B3PW91) in conjunction with following basis sets; LanL2DZ<sup>11,12</sup> with effective core potential (ECP) for Pd, 6-31+G\*<sup>13,14,15</sup> for O, C on phenanthrene and phenyl group due to the necessity of diffuse function to describe the extra electron placed far from the nuclei in the atoms, 6-31G\* for Cl and other C atoms, 6-31G\*\* for H on phenanthrene and 6-31G for other H atoms (called BS1). All structures were optimized without any symmetry assumptions and verified to be minima (no imaginary frequencies) or transition states (one imaginary frequency) on the free energy surface with analytical frequency calculations with B3PW91/BS1 level of theory. The transition states were confirmed by full intrinsic reaction coordinate<sup>16,17</sup> (IRC) calculations at the B3PW91/BS1 level. Full IRC calculations allowed displaying the direct connection between transition states and their corresponding reactants and products. For single-point energy calculations we employed the spin-component-scaled Møller-Plesset second-order perturbation theory<sup>18</sup> (SCS-MP2) to obtain more reliable energy because it usually gives results close to the experimental value. With SCS-MP2 theory we used larger basis sets; Stuttgart-Dresden basis set<sup>19</sup> (SDD) with ECP for Pd, 6-311+G\* for O, C on phenanthrene and phenyl group, 6-311G\* for Cl and other C atoms, 6-311G\*\* for H (called BS2). Zero-point energy, enthalpy, and Gibbs free energy at 353.15 K and 1 atm were estimated from the gas-phase studies. For calculation details, see Supplementary Figure 42 and Supplementary Table 1.

## Supplementary References

- (1) Tashiro, M. & Yamato, T. Studies on selective preparation of aromatic compounds. 20. Selective preparation of 2-mono- and 2,2'-disubstituted biphenyl using the *tert*-butyl group as a positional protective group. *J. Org. Chem.* **44**, 3037–3041 (1979).
- (2) Fürstner, A. & Mamane, V. Flexible synthesis of phenanthrenes by a PtCl<sub>2</sub>-catalyzed cycloisomerization reaction. *J. Org. Chem.* **67**, 6264–6267 (2002).
- (3) Neugebauer, W., Kos, A. J. & Schleyer, P. v. R. Regioselektive dimetallierung von aromaten. Bequemer zugang zu 2,2'-disubstituierten biphenylderivaten. *J. Organomet. Chem.* **228**, 107–118 (1982).
- (4) Ureshino, T., Yoshida, T., Kuninobu, Y. & Takai, K. Rhodium-catalyzed synthesis of silafluorene derivatives via cleavage of silicon–hydrogen and carbon–hydrogen bonds. *J. Am. Chem. Soc.* **132**, 14324–14326 (2010).
- (5) Shimizu, M., Tatsumi, H., Mochida, K., Oda, K. & Hiyama, T. Silicon-bridge effects on photophysical properties of silafluorenes. *Chem. Asian J.* **3**, 1238–1247 (2008).
- (6) Omachi, H., Matsuura, S., Segawa, Y. & Itami, K. A modular and size-selective synthesis of [*n*]cycloparaphenylenes: A step toward the selective synthesis of [*n,n*] single-walled carbon nanotubes. *Angew. Chem. Int. Ed.* **49**, 10202–10205 (2010).
- (7) Li, C.-W., Wang, C.-I., Liao, H.-Y., Chaudhuri, R. & Liu, R.-S. Synthesis of dibenzo[*g,p*]chrysenes from bis(biaryl)acetylenes via sequential ICl-induced cyclization and Mizoroki–Heck coupling. *J. Org. Chem.* **72**, 9203–9207 (2007).
- (8) Frisch, M. J., Trucks, G. W., Schlegel, H. B., Scuseria, G. E., Robb, M. A., Cheeseman, J. R., Montgomery, J., J. A., Vreven, T., Kudin, K. N., Burant, J. C., Millam, J. M., Iyengar, S. S., Tomasi, J., Barone, V., Mennucci, B., Cossi, M., Scalmani, G., Rega, N., Petersson, G. A., Nakatsuji, H., Hada, M., Ehara, M., Toyota, K., Fukuda, R., Hasegawa, J., Ishida, M., Nakajima, T., Honda, Y., Kitao, O., Nakai, H., Klene, M., Li, X., Knox, J. E., Hratchian, H. P., Cross, J. B., Bakken, V., Adamo, C., Jaramillo, J., Gomperts, R., Stratmann, R. E., Yazyev, O., Austin, A. J., Cammi, R., Pomelli, C., Ochterski, J. W., Ayala, P. Y., Morokuma, K., Voth, G. A., Salvador, P., Dannenberg, J. J., Zakrzewski, V. G., Dapprich, S., Daniels, A. D., Strain, M. C., Farkas, O., Malick, D. K., Rabuck, A. D., Raghavachari, K., Foresman, J. B., Ortiz, J. V., Cui, Q., Baboul, A. G., Clifford, S., Cioslowski, J., Stefanov, B. B., Liu, G., Liashenko, A., Piskorz, P., Komaromi, I., Martin, R. L., Fox, D. J., Keith, T., Al-Laham, M. A., Peng, C. Y., Nanayakkara, A., Challacombe, M., Gill, P. M. W., Johnson, B., Chen, W., Wong, M. W., Gonzalez, C. & Pople, J. A. *Gaussian09, Revision E.01* (Gaussian, Inc./Wallingford CT, 2004).
- (9) Becke, A. D. Density–functional thermochemistry. III. The role of exact exchange. *J. Chem. Phys.* **98**, 5648–5652 (1993).
- (10) Perdew, J. P. *Unified Theory of Exchange and Correlation Beyond the Local Density*



- Approximation/Electronic Structure of Solids* (Eds: Ziesche, P. & Eschrig, H.) 11–20 (Akademie Verlag/Berlin, 1991).
- (11) Dunning, T. H., Jr & Hay, P. J. *Methods of Electronic Structure Theory/Modern Theoretical Chemistry* (Ed: Schaefer, H. F., III), **3**, 1–27 (Springer, 1977).
- (12) Hay, P. J. & Wadt, W. R. *Ab initio* effective core potentials for molecular calculations. Potentials for the transition metal atoms Sc to Hg. *J. Chem. Phys.* **82**, 270–283 (1985).
- (13) Petersson, G. A., Bennett, A., Tensfeldt, T. G., Al-Laham, M. A., Shirley, W. A. & Mantzaris, J. A complete basis set model chemistry. I. The total energies of closed-shell atoms and hydrides of the first-row elements. *J. Chem. Phys.* **89**, 2193–2218 (1989).
- (14) Petersson, G. A. & Al-Laham, M. A. A complete basis set model chemistry. II. Open-shell systems and the total energies of the first-row atoms. *J. Chem. Phys.* **94**, 6081–6090 (1991).
- (15) Clark, T., Chandrasekhar, J., Spitznagel, G. W. & Schleyer, P. v. R. Efficient diffuse function-augmented basis sets for anion calculations. III. The 3-21+G basis set for first-row elements, Li–F. *J. Comp. Chem.* **4**, 294–301 (1983).
- (16) Dunning, T. H., Jr & Hay, P. J. *Methods of Electronic Structure Theory/Modern Theoretical Chemistry* (Ed: Schaefer, H. F., III), **3**, 1–27 (Springer, 1977).
- (17) Hay, P. J. & Wadt, W. R. *Ab initio* effective core potentials for molecular calculations. Potentials for the transition metal atoms Sc to Hg. *J. Chem. Phys.* **82**, 270–283 (1985).
- (18) Grimme, S. Improved second-order Møller–Plesset perturbation theory by separate scaling of parallel- and antiparallel-spin pair correlation energies. *J. Chem. Phys.* **118**, 9095–9102 (2003).
- (19) Fuentealba, P., Preuss, H., Stoll, H. & Von Szentpály, L. A proper account of core-polarization with pseudopotentials: single valence-electron alkali compounds. *Chem. Phys. Lett.* **89**, 418–422 (1982).
